# Supplementary material
Source: PubMed Central journal article supplement (PMC6071822)
Supplement: EHP3062.s001.acco.pdf [file EHP3062.s001.acco.pdf]

**Note to readers with disabilities:** *EHP* strives to ensure that all journal content is accessible to all readers. However, some figures and Supplemental Material published in *EHP* articles may not conform to [508 standards](#) due to the complexity of the information being presented. If you need assistance accessing journal content, please contact [ehp508@niehs.nih.gov](mailto:ehp508@niehs.nih.gov). Our staff will work with you to assess and meet your accessibility needs within 3 working days.

### **Supplemental Material**

#### **Modeling the Present and Future Incidence of Pediatric Hand, Foot, and Mouth Disease Associated with Ambient Temperature in Mainland China**

Qi Zhao, Shanshan Li, Wei Cao, De-Li Liu, Quan Qian, Hongyan Ren, Fan Ding, Gail Williams, Rachel Huxley, Wenyi Zhang, and Yuming Guo

#### **Table of Contents**

**Table S1.** 28 general climate models of the 5<sup>th</sup> phase of Coupled Model Intercomparison Project.

**Table S2.** Reference temperatures used for each prefecture/CJP for estimating the relative risk of HFMD in association with daily mean temperature.

**Table S3.** Results of Cochran Q test and values of  $I^2$  statistic for each estimate pooled at province level.

**Table S4.** Projected percentage change (and 95% eCIs) in HFMD incidence among children aged 0–14 years due to climate change (RCP 4.5 and 8.5 scenarios) by site and decade relative to baseline estimates for 2009–2014, holding population sizes and temperature-HFMD associations constant over time.

**Table S5.** Projected percentage change (and 95% eCIs) in HFMD incidence among children aged 0–14 years due to climate change (RCP 4.5 and 8.5 scenarios) by region and decade relative to baseline estimates for 2009–2014, accounting for projected changes in population sizes.

**Table S6.** Projected percentage change (and 95% eCIs) in HFMD incidence among children aged 0–14 years due to climate change (RCP 4.5 and 8.5 scenarios) by site and decade relative to baseline estimates for 2009–2014, accounting for projected changes in population sizes.

**Table S7.** Projected percentage change (and 95% eCIs) in HFMD incidence (national level) among children aged 0–14 years due to climate change (RCP 4.5 and 8.5 scenarios), relative to baseline estimates for 2009–2014, estimated using models including natural cubic splines (seven to nine degrees of freedom per year) to control for seasonality and long-term trend.

**Figure S1.** Distribution of the lowest daily mean temperature at which HFMD cases were diagnosed across 362 sites in China during 2009–2014. Abbreviation: HFMD, hand, foot, and mouth disease.

**Figure S2.** Daily HFMD counts and mean temperature in representative cities in nine Chinese regions during 2009–2014. Data on daily HFMD and weather for each city were extracted from the China Information System for Disease Control and Prevention (<http://www.cdpc.chinacdc.cn>) and China Meteorological Data Sharing Service System (<http://data.cma.gov.cn>), respectively. Abbreviation: HFMD, hand, foot, and mouth disease.

**Figure S3.** Pooled associations between daily mean temperature and HFMD in each province or municipality in the Northeast, Inner Mongolia, and North over a 0–14 day cumulative lag during 2009–2014. Solid lines represent province- or municipality-specific associations; shaded areas indicate 95% confidence interval bands. Grey-dashed lines indicate associations estimated for individual prefectures or CJPs. Natural cubic splines (with three degrees of freedom) were used to model temperature and lag days, respectively.  $I^2$  statistics for each pooled estimate are provided in Table S3. Patterns of associations are irregular for some prefecture- or CJP-specific associations because of small numbers of HFMD cases. Abbreviations: HFMD, hand, foot, and mouth disease; CJP, county under the jurisdiction of province; RR, relative risk.

**Figure S4.** Pooled associations between daily mean temperature and HFMD in each province or municipality in the East over a 0–14 day cumulative lag during 2009–2014. Solid lines represent province- or municipality-specific associations; shaded areas indicate 95% confidence interval bands. Grey-dashed lines indicate associations estimated for individual prefectures or CJPs. Natural cubic splines (with three degrees of freedom) were used to model temperature and lag days, respectively.  $I^2$  statistics for each pooled estimate are provided in Table S3. Patterns of associations are irregular for some prefecture- or CJP-specific associations because of small numbers of HFMD cases. Abbreviations: HFMD, hand, foot, and mouth disease; CJP, county under the jurisdiction of province; RR, relative risk.

**Figure S5.** Pooled associations between daily mean temperature and HFMD in each province or municipality in the Northwest and Central regions over a 0–14 day cumulative lag during 2009–2014. Solid lines represent province- or municipality-specific associations; shaded areas indicate 95% confidence interval bands. Grey-dashed lines indicate associations estimated for individual prefectures or CJPs. Natural cubic splines (with three degrees of freedom) were used to model temperature and lag days, respectively.  $I^2$  statistics for each pooled estimate are provided in Table S3. Patterns of associations are irregular for some prefecture- or CJP-specific associations because of small numbers of HFMD cases. Abbreviations: HFMD, hand, foot, and mouth disease; CJP, county under the jurisdiction of province; RR, relative risk.

**Figure S6.** Pooled associations between daily mean temperature and HFMD in each province or municipality in the Southwest, South and Qingzang regions over a 0–14 day cumulative lag during 2009–2014. Solid lines represent province- or municipality-specific associations; shaded areas indicate 95% confidence interval bands. Grey-dashed lines indicate associations estimated for individual prefectures or CJPs. Natural cubic splines (with three degrees of freedom) were used to model temperature and lag days, respectively.  $I^2$  statistics for each pooled estimate are provided in Table S3. Patterns of associations are irregular for some prefecture- or CJP-specific associations because of small numbers of HFMD cases. Abbreviations: HFMD, hand, foot, and mouth disease; CJP, county under the jurisdiction of province; RR, relative risk.

**Figure S7.** Pooled associations between daily mean temperature and HFMD for all locations (national level) during 2009–2014 for models with the maximum lag set at 14 days (the primary model) and 15–19 days. The grey-shaded areas indicate the 95% confidence interval bands, which are negligible due to the narrow values. Natural cubic splines (with three degrees of freedom) were used to model temperature and lag days, respectively. Abbreviations: HFMD, hand, foot, and mouth disease; RR, relative risk.

**Figure S8.** Pooled associations between daily mean temperature and HFMD for all locations (national level) during 2009–2014 based on the primary model, and with additional adjustment for daily wind velocity and daily sunshine hours, respectively. The grey-shaded areas indicate the 95% confidence interval bands, which are negligible due to the narrow values. Natural cubic splines (with three degrees of freedom) were used to model temperature and lag days, respectively. Abbreviations: HFMD, hand, foot, and mouth disease; RR, relative risk.

**Figure S9.** Pooled associations between daily mean temperature and HFMD for all locations (national level) during 2009–2014 based on the primary model (with indicator terms for year and month) and alternative models using natural cubic splines (with seven to nine degrees of freedom per year) to control for seasonality and long-term trend. The grey-shaded areas indicate the 95% confidence interval bands, which are negligible due to the narrow values. Natural cubic splines (with three degrees of freedom) were used to model temperature and lag days, respectively. Abbreviations: HFMD, hand, foot, and mouth disease; RR, relative risk.

**Table S1.** 28 general climate models of the 5<sup>th</sup> phase of Coupled Model Intercomparison Project.

| <b>Model Name</b> | <b>Abbreviation</b> | <b>Modelling Centre</b>                                                              | <b>Country</b> |
|-------------------|---------------------|--------------------------------------------------------------------------------------|----------------|
| BCC-CSM1.1        | BC1                 | Beijing Climate Centre                                                               | China          |
| BCC-CSM1.1(m)     | BC2                 | Beijing Climate Centre                                                               | China          |
| BNU-ESM           | BNU                 | CGCESS, Beijing Normal University                                                    | China          |
| CanESM2           | CaE                 | Canadian Centre for Climate Modelling and Analysis                                   | Canada         |
| CCSM4             | CCS                 | National Centre for Atmospheric Research                                             | USA            |
| CESM1(BGC)        | CE1                 | Community Earth System Model Contributors                                            | USA            |
| CMCC-CM           | CM2                 | Euro-Mediterranean Centre on Climate Change                                          | Italy          |
| CMCC-CMS          | CM3                 | Euro-Mediterranean Centre on Climate Change                                          | Italy          |
| CSIRO-Mk3.6.0     | CSI                 | CSIRO                                                                                | Australia      |
| EC-EARTH          | ECE                 | EC-EARTH consortium                                                                  | EU             |
| FIO-ESM           | FIO                 | The First Institute of Oceanography, SOA, China                                      | China          |
| GFDL-CM3          | GF2                 | NOAA Geophysical Fluid Dynamics Laboratory                                           | USA            |
| GFDL-ESM2G        | GF3                 | NOAA Geophysical Fluid Dynamics Laboratory                                           | USA            |
| GFDL-ESM2M        | GF4                 | NOAA Geophysical Fluid Dynamics Laboratory                                           | USA            |
| GISS-E2-H-CC      | GE2                 | NASA Goddard Institute for Space Studies                                             | USA            |
| GISS-E2-R         | GE3                 | NASA Goddard Institute for Space Studies                                             | USA            |
| HadGEM2-AO        | Ha5                 | National Institute of Meteorological Research/Korea<br>Meteorological Administration | South Korea    |
| INM-CM4           | INC                 | Institute for Numerical Mathematics                                                  | Russia         |
| IPSL-CM5A-MR      | IP2                 | Institute Pierre-Simon Laplace                                                       | France         |
| IPSL-CM5B-LR      | IP3                 | Institute Pierre-Simon Laplace                                                       | France         |
| MIROC5            | MI2                 | AORI, NIES, and JAMST                                                                | Japan          |
| MIROC-ESM         | MI3                 | AORI, NIES, and JAMST                                                                | Japan          |
| MIROC-ESM-CHEM    | MI4                 | AORI, NIES, and JAMST                                                                | Japan          |
| MPI-ESM-LR        | MP1                 | Max Planck Institute for Meteorology                                                 | Germany        |
| MPI-ESM-MR        | MP2                 | Max Planck Institute for Meteorology                                                 | Germany        |
| MRI-CGCM3         | MR3                 | Meteorological Research Institute                                                    | Japan          |
| NorESM1-M         | NE1                 | Norwegian Climate Centre                                                             | Norway         |
| NorESM1-ME        | NE2                 | Norwegian Climate Centre                                                             | Norway         |

**Table S2.** Reference temperatures used for each prefecture/CJP for estimating the relative risk of HFMD in association with daily mean temperature.

| Province or municipality | Prefecture/CJP | Administrative code | Reference temperature (°C) |
|--------------------------|----------------|---------------------|----------------------------|
| <b>North</b>             |                |                     |                            |
| Beijing                  | Beijing        | 110000              | -3.6                       |
| Tianjin                  | Tianjin        | 120000              | -3.6                       |
| Hebei                    | Shijiazhuang   | 130100              | -3.6                       |
| Hebei                    | Tangshan       | 130200              | -3.6                       |
| Hebei                    | Qinhuangdao    | 130300              | -3.6                       |
| Hebei                    | Handan         | 130400              | -3.6                       |
| Hebei                    | Xingtai        | 130500              | -3.6                       |
| Hebei                    | Baoding        | 130600              | -3.6                       |
| Hebei                    | Zhangjiakou    | 130700              | -3.6                       |
| Hebei                    | Chengde        | 130800              | -3.6                       |
| Hebei                    | Cangzhou       | 130900              | -3.6                       |
| Hebei                    | Langfang       | 131000              | -3.6                       |
| Hebei                    | Hengshui       | 131100              | -3.6                       |
| Shanxi                   | Taiyuan        | 140100              | -3.6                       |
| Shanxi                   | Datong         | 140200              | -3.6                       |
| Shanxi                   | Yangquan       | 140300              | -3.6                       |
| Shanxi                   | Changzhi       | 140400              | -3.6                       |
| Shanxi                   | Jincheng       | 140500              | -3.6                       |
| Shanxi                   | Shuozhou       | 140600              | -3.6                       |
| Shanxi                   | Jinzhong       | 140700              | -3.6                       |
| Shanxi                   | Yuncheng       | 140800              | -3.6                       |
| Shanxi                   | Xinzhou        | 140900              | -3.6                       |
| Shanxi                   | Linfen         | 141000              | -3.6                       |
| Shanxi                   | Lvliang        | 141100              | -3.6                       |
| <b>Inner Mongolia</b>    |                |                     |                            |
| Inner Mongolia           | Hohhot         | 150100              | -3.6                       |
| Inner Mongolia           | Baotou         | 150200              | -3.6                       |
| Inner Mongolia           | Wuhai          | 150300              | -3.6                       |
| Inner Mongolia           | Chifeng        | 150400              | -3.6                       |
| Inner Mongolia           | Tongliao       | 150500              | -3.6                       |
| Inner Mongolia           | Ordos          | 150600              | -3.6                       |
| Inner Mongolia           | Hulunber       | 150700              | -3.6                       |
| Inner Mongolia           | Bayan Nur      | 150800              | -3.6                       |
| Inner Mongolia           | Ulanqab        | 150900              | -3.6                       |
| Inner Mongolia           | Hinggan        | 152200              | -3.6                       |
| Inner Mongolia           | Xilin Gol      | 152500              | -3.6                       |
| Inner Mongolia           | Alxa           | 152900              | -3.6                       |
| <b>Northeast</b>         |                |                     |                            |
| Liaoning                 | Shenyang       | 210100              | -3.6                       |
| Liaoning                 | Dalian         | 210200              | -3.6                       |
| Liaoning                 | Anshan         | 210300              | -3.6                       |
| Liaoning                 | Fushun         | 210400              | -3.6                       |

|              |              |        |      |
|--------------|--------------|--------|------|
| Liaoning     | Benxi        | 210500 | -3.6 |
| Liaoning     | Dandong      | 210600 | -3.6 |
| Liaoning     | Jinzhou      | 210700 | -3.6 |
| Liaoning     | Yingkou      | 210800 | -3.6 |
| Liaoning     | Fuxin        | 210900 | -3.6 |
| Liaoning     | Liaoyang     | 211000 | -3.6 |
| Liaoning     | Panjin       | 211100 | -3.6 |
| Liaoning     | Tieling      | 211200 | -3.6 |
| Liaoning     | Chaoyang     | 211300 | -3.6 |
| Liaoning     | Huludao      | 211400 | -3.6 |
| Jilin        | Changchun    | 220100 | -3.6 |
| Jilin        | Jilin        | 220200 | -3.6 |
| Jilin        | Siping       | 220300 | -3.6 |
| Jilin        | Liaoyuan     | 220400 | -3.6 |
| Jilin        | Tonghua      | 220500 | -3.6 |
| Jilin        | Baishan      | 220600 | -3.6 |
| Jilin        | Songyuan     | 220700 | -3.6 |
| Jilin        | Baicheng     | 220800 | -3.6 |
| Jilin        | Yanbian      | 222400 | -3.6 |
| Heilongjiang | Harbin       | 230100 | -3.6 |
| Heilongjiang | Qiqihar      | 230200 | -3.6 |
| Heilongjiang | Jixi         | 230300 | -3.6 |
| Heilongjiang | Hegang       | 230400 | -3.6 |
| Heilongjiang | Shuangyashan | 230500 | -3.6 |
| Heilongjiang | Daqing       | 230600 | -3.6 |
| Heilongjiang | Yichun       | 230700 | -3.6 |
| Heilongjiang | Jiamusi      | 230800 | -3.6 |
| Heilongjiang | Qitaihe      | 230900 | -3.6 |
| Heilongjiang | Mudanjiang   | 231000 | -3.6 |
| Heilongjiang | Heihe        | 231100 | -3.6 |
| Heilongjiang | Suihua       | 231200 | -3.6 |
| Heilongjiang | DaXingAnLing | 232700 | -3.6 |
| <b>East</b>  |              |        |      |
| Shanghai     | Shanghai     | 310000 | -3.4 |
| Jiangsu      | Nanjing      | 320100 | -3.6 |
| Jiangsu      | Wuxi         | 320200 | -3.6 |
| Jiangsu      | Xuzhou       | 320300 | -3.6 |
| Jiangsu      | Changzhou    | 320400 | -3.6 |
| Jiangsu      | Suzhou       | 320500 | -3.4 |
| Jiangsu      | Nantong      | 320600 | -3.6 |
| Jiangsu      | Lianyungang  | 320700 | -3.6 |
| Jiangsu      | Huai'an      | 320800 | -3.6 |
| Jiangsu      | Yancheng     | 320900 | -3.6 |
| Jiangsu      | Yangzhou     | 321000 | -3.6 |
| Jiangsu      | Zhenjiang    | 321100 | -3.6 |
| Jiangsu      | Taizhou      | 321200 | -3.6 |

|          |            |        |      |
|----------|------------|--------|------|
| Jiangsu  | Suqian     | 321300 | -3.6 |
| Zhejiang | Hangzhou   | 330100 | -2.0 |
| Zhejiang | Ningbo     | 330200 | -1.6 |
| Zhejiang | Wenzhou    | 330300 | 0.7  |
| Zhejiang | Jiaxing    | 330400 | -2.7 |
| Zhejiang | Huzhou     | 330500 | -3.0 |
| Zhejiang | Shaoxing   | 330600 | -2.3 |
| Zhejiang | Jinhua     | 330700 | -1.4 |
| Zhejiang | Quzhou     | 330800 | -1.5 |
| Zhejiang | Zhoushan   | 330900 | 1.2  |
| Zhejiang | Taizhou    | 331000 | -0.4 |
| Zhejiang | Lishui     | 331100 | -0.3 |
| Anhui    | Hefei      | 340100 | -3.3 |
| Anhui    | Wuhu       | 340200 | -3.4 |
| Anhui    | Bengbu     | 340300 | -3.6 |
| Anhui    | Huainan    | 340400 | -3.6 |
| Anhui    | Ma'anshan  | 340500 | -3.6 |
| Anhui    | Huaibei    | 340600 | -3.6 |
| Anhui    | Tongling   | 340700 | -2.4 |
| Anhui    | Anqing     | 340800 | -3.3 |
| Anhui    | Huangshan  | 341000 | -2.1 |
| Anhui    | Chuzhou    | 341100 | -3.6 |
| Anhui    | Fuyang     | 341200 | -3.6 |
| Anhui    | Suzhou     | 341300 | -3.6 |
| Anhui    | Lu'an      | 341500 | -3.3 |
| Anhui    | Bozhou     | 341600 | -3.6 |
| Anhui    | Chizhou    | 341700 | -3.4 |
| Anhui    | Xuancheng  | 341800 | -3.4 |
| Fujian   | Fuzhou     | 350100 | 4.4  |
| Fujian   | Xiamen     | 350200 | 6.7  |
| Fujian   | Putian     | 350300 | 5.4  |
| Fujian   | Sanming    | 350400 | 1.4  |
| Fujian   | Quanzhou   | 350500 | 5.6  |
| Fujian   | Zhangzhou  | 350600 | 7.3  |
| Fujian   | Nanping    | 350700 | 1.8  |
| Fujian   | Longyan    | 350800 | 3.8  |
| Fujian   | Ningde     | 350900 | 3.2  |
| Jiangxi  | Nanchang   | 360100 | -2.3 |
| Jiangxi  | Jingdezhen | 360200 | -0.7 |
| Jiangxi  | Pingxiang  | 360300 | -0.6 |
| Jiangxi  | Jiujiang   | 360400 | 3.9  |
| Jiangxi  | Xinyu      | 360500 | -0.6 |
| Jiangxi  | Yingtian   | 360600 | -0.5 |
| Jiangxi  | Ganzhou    | 360700 | -0.3 |
| Jiangxi  | Ji'an      | 360800 | 0.2  |
| Jiangxi  | Yichun     | 360900 | -1.2 |

|                       |              |        |      |
|-----------------------|--------------|--------|------|
| Jiangxi               | Fuzhou       | 361000 | -0.8 |
| Jiangxi               | Shangrao     | 361100 | -1.2 |
| Shandong              | Jinan        | 370100 | -3.6 |
| Shandong              | Qingdao      | 370200 | -3.6 |
| Shandong              | Zibo         | 370300 | -3.6 |
| Shandong              | Zaozhuang    | 370400 | -3.6 |
| Shandong              | Dongying     | 370500 | -3.6 |
| Shandong              | Yantai       | 370600 | -3.6 |
| Shandong              | Weifang      | 370700 | -3.6 |
| Shandong              | Jining       | 370800 | -3.6 |
| Shandong              | Tai'an       | 370900 | -3.6 |
| Shandong              | Weihai       | 371000 | -3.6 |
| Shandong              | Rizhao       | 371100 | -3.6 |
| Shandong              | Laiwu        | 371200 | -3.6 |
| Shandong              | Linyi        | 371300 | -3.6 |
| Shandong              | Dezhou       | 371400 | -3.6 |
| Shandong              | Liaocheng    | 371500 | -3.6 |
| Shandong              | Binzhou      | 371600 | -3.6 |
| Shandong              | Heze         | 371700 | -3.6 |
| <b>Central region</b> |              |        |      |
| Henan                 | Zhengzhou    | 410100 | -3.6 |
| Henan                 | Kaifeng      | 410200 | -3.6 |
| Henan                 | Luoyang      | 410300 | -3.6 |
| Henan                 | Pingdingshan | 410400 | -3.6 |
| Henan                 | Anyang       | 410500 | -3.6 |
| Henan                 | Hebi         | 410600 | -3.6 |
| Henan                 | Xinxiang     | 410700 | -3.6 |
| Henan                 | Jiaozuo      | 410800 | -3.6 |
| Henan                 | Puyang       | 410900 | -3.6 |
| Henan                 | Xuchang      | 411000 | -3.6 |
| Henan                 | Luohe        | 411100 | -3.6 |
| Henan                 | Sanmenxia    | 411200 | -3.6 |
| Henan                 | Nanyang      | 411300 | -3.6 |
| Henan                 | Shangqiu     | 411400 | -3.6 |
| Henan                 | Xinyang      | 411500 | -3.6 |
| Henan                 | Zhoukou      | 411600 | -3.6 |
| Henan                 | Zhumadian    | 411700 | -3.6 |
| Henan                 | Jiyuan       | 419000 | -3.6 |
| Hubei                 | Wuhan        | 420100 | -2.9 |
| Hubei                 | Huangshi     | 420200 | -1.7 |
| Hubei                 | Shiyan       | 420300 | -3.6 |
| Hubei                 | Yichang      | 420500 | -1.9 |
| Hubei                 | Xiangyang    | 420600 | -2.9 |
| Hubei                 | Ezhou        | 420700 | -1.7 |
| Hubei                 | Jingmen      | 420800 | -2.2 |
| Hubei                 | Xiaogan      | 420900 | -2.4 |



|              |             |        |      |
|--------------|-------------|--------|------|
| Hubei        | Jingzhou    | 421000 | -2.1 |
| Hubei        | Huanggang   | 421100 | -1.7 |
| Hubei        | Xianning    | 421200 | -2.1 |
| Hubei        | Suizhou     | 421300 | -3.6 |
| Hubei        | Enshi       | 422800 | -1.5 |
| Hubei        | Xiantao     | 429100 | -2.2 |
| Hubei        | Qianjiang   | 429200 | -2.2 |
| Hubei        | Tianmen     | 429300 | -2.1 |
| Hubei        | Shennongjia | 429400 | -2.1 |
| Hunan        | Changsha    | 430100 | -1.9 |
| Hunan        | Zhuzhou     | 430200 | -1.7 |
| Hunan        | Xiangtan    | 430300 | -1.7 |
| Hunan        | Hengyang    | 430400 | -1.6 |
| Hunan        | Shaoyang    | 430500 | -3.1 |
| Hunan        | Yueyang     | 430600 | -3.2 |
| Hunan        | Changde     | 430700 | -2.7 |
| Hunan        | Zhangjiajie | 430800 | -2.1 |
| Hunan        | Yiyang      | 430900 | -2.2 |
| Hunan        | Chenzhou    | 431000 | -1.6 |
| Hunan        | Yongzhou    | 431100 | -3.0 |
| Hunan        | Huaihua     | 431200 | -2.4 |
| Hunan        | Loudi       | 431300 | -2.2 |
| Hunan        | Xiangxi     | 433100 | -2.2 |
| <b>South</b> |             |        |      |
| Guangdong    | Guangzhou   | 440100 | 4.8  |
| Guangdong    | Shaoguan    | 440200 | 2.0  |
| Guangdong    | Shenzhen    | 440300 | 5.4  |
| Guangdong    | Zhuhai      | 440400 | 5.7  |
| Guangdong    | Shantou     | 440500 | 7.0  |
| Guangdong    | Foshan      | 440600 | 4.8  |
| Guangdong    | Jiangmen    | 440700 | 5.3  |
| Guangdong    | Zhanjiang   | 440800 | 6.8  |
| Guangdong    | Maoming     | 440900 | 6.9  |
| Guangdong    | Zhaoqing    | 441200 | 5.4  |
| Guangdong    | Huizhou     | 441300 | 4.3  |
| Guangdong    | Meizhou     | 441400 | 4.2  |
| Guangdong    | Shanwei     | 441500 | 6.6  |
| Guangdong    | Heyuan      | 441600 | 3.8  |
| Guangdong    | Yangjiang   | 441700 | 5.0  |
| Guangdong    | Qingyuan    | 441800 | 4.0  |
| Guangdong    | Dongguan    | 441900 | 5.2  |
| Guangdong    | Zhongshan   | 442000 | 5.3  |
| Guangdong    | Chaozhou    | 445100 | 7.0  |
| Guangdong    | Jieyang     | 445200 | 7.0  |
| Guangdong    | Yunfu       | 445300 | 5.4  |
| Guangxi      | Nanning     | 450100 | 4.5  |

|                  |               |        |      |
|------------------|---------------|--------|------|
| Guangxi          | Liuzhou       | 450200 | 1.7  |
| Guangxi          | Guilin        | 450300 | 0.2  |
| Guangxi          | Wuzhou        | 450400 | 3.4  |
| Guangxi          | Beihai        | 450500 | 5.0  |
| Guangxi          | Fangchenggang | 450600 | 5.9  |
| Guangxi          | Qinzhou       | 450700 | 5.1  |
| Guangxi          | Guigang       | 450800 | 4.7  |
| Guangxi          | Yulin         | 450900 | 4.8  |
| Guangxi          | Baise         | 451000 | 6.1  |
| Guangxi          | Hezhou        | 451100 | 0.8  |
| Guangxi          | Hechi         | 451200 | 2.6  |
| Guangxi          | Laibin        | 451300 | 2.5  |
| Guangxi          | Chongzuo      | 451400 | 6.5  |
| Hainan           | Haikou        | 460100 | 9.4  |
| Hainan           | Sanya         | 460200 | 12.5 |
| Hainan           | Wuzhishan     | 461100 | 11.0 |
| Hainan           | Qionghai      | 461200 | 10.6 |
| Hainan           | Danzhou       | 461300 | 9.0  |
| Hainan           | Wenchang      | 461500 | 10.6 |
| Hainan           | Wanning       | 461600 | 10.9 |
| Hainan           | Dongfang      | 461700 | 11.2 |
| Hainan           | Ding'an       | 462100 | 9.8  |
| Hainan           | Tunchang      | 462200 | 12.0 |
| Hainan           | Chengmai      | 462300 | 9.4  |
| Hainan           | Lingao        | 462400 | 10.0 |
| Hainan           | Baisha        | 462500 | 9.4  |
| Hainan           | Changjiang    | 462600 | 11.2 |
| Hainan           | Ledong        | 462700 | 12.5 |
| Hainan           | Lingshui      | 462800 | 14.4 |
| Hainan           | Baoting       | 462900 | 15.0 |
| Hainan           | Qiongzong     | 463000 | 11.0 |
| <b>Southwest</b> |               |        |      |
| Chongqing        | Chongqing     | 500000 | 3.0  |
| Sichuan          | Chengdu       | 510100 | -0.4 |
| Sichuan          | Zigong        | 510300 | 2.5  |
| Sichuan          | Panzhihua     | 510400 | 5.9  |
| Sichuan          | Luzhou        | 510500 | 3.4  |
| Sichuan          | Deyang        | 510600 | 0.6  |
| Sichuan          | Mianyang      | 510700 | 0.6  |
| Sichuan          | Guangyuan     | 510800 | 0.8  |
| Sichuan          | Suining       | 510900 | 1.3  |
| Sichuan          | Neijiang      | 511000 | 0.9  |
| Sichuan          | Leshan        | 511100 | 1.6  |
| Sichuan          | Nanchong      | 511300 | 1.6  |
| Sichuan          | Meishan       | 511400 | 1.9  |
| Sichuan          | Yibin         | 511500 | 3.7  |

|                 |               |        |      |
|-----------------|---------------|--------|------|
| Sichuan         | Guang'an      | 511600 | 1.6  |
| Sichuan         | Dazhou        | 511700 | 2.6  |
| Sichuan         | Ya'an         | 511800 | 0.8  |
| Sichuan         | Bazhong       | 511900 | 1.1  |
| Sichuan         | Ziyang        | 512000 | 2.0  |
| Sichuan         | Aba           | 513200 | -3.6 |
| Sichuan         | Garze         | 513300 | -3.6 |
| Sichuan         | Liangshan     | 513400 | 1.0  |
| Guizhou         | Guiyang       | 520100 | -3.6 |
| Guizhou         | Liupanshui    | 520200 | -3.6 |
| Guizhou         | Zunyi         | 520300 | -2.0 |
| Guizhou         | Anshun        | 520400 | -3.2 |
| Guizhou         | Bijie         | 520500 | -3.5 |
| Guizhou         | Tongren       | 520600 | -1.3 |
| Guizhou         | Qianxinan     | 522300 | 0.3  |
| Guizhou         | Qiandongnan   | 522600 | -3.3 |
| Guizhou         | Qiannan       | 522700 | -3.6 |
| Yunnan          | Kunming       | 530100 | -0.9 |
| Yunnan          | Qujing        | 530300 | -2.9 |
| Yunnan          | Yuxi          | 530400 | 1.2  |
| Yunnan          | Baoshan       | 530500 | 5.0  |
| Yunnan          | Zhaotong      | 530600 | -3.6 |
| Yunnan          | Lijiang       | 530700 | -1.0 |
| Yunnan          | Pu'er         | 530800 | 6.6  |
| Yunnan          | Lincang       | 530900 | 5.3  |
| Yunnan          | Chuxiong      | 532300 | 1.4  |
| Yunnan          | Honghe        | 532500 | 3.6  |
| Yunnan          | Wenshan       | 532600 | 0.6  |
| Yunnan          | Xishuangbanna | 532800 | 10.2 |
| Yunnan          | Dali          | 532900 | 0.3  |
| Yunnan          | Dehong        | 533100 | 4.8  |
| Yunnan          | Nujiang       | 533300 | 5.5  |
| Yunnan          | Deqen         | 533400 | -3.6 |
| <b>Qingzang</b> |               |        |      |
| Tibet           | Lhasa         | 540100 | -3.6 |
| Tibet           | Rikaze        | 540200 | -3.6 |
| Tibet           | Qamdo         | 540300 | 6.8  |
| Tibet           | Shannan       | 542200 | -3.6 |
| Tibet           | Nagqu         | 542400 | -3.6 |
| Tibet           | Ngari         | 542500 | -3.6 |
| Tibet           | Nyingchi      | 542600 | -1.7 |
| Qinghai         | Xining        | 630100 | -3.6 |
| Qinghai         | Haidong       | 630200 | -3.6 |
| Qinghai         | Haibei        | 632200 | -3.6 |
| Qinghai         | Huangnan      | 632300 | 2.5  |
| Qinghai         | Hainan        | 632500 | -3.6 |

|                  |            |        |      |
|------------------|------------|--------|------|
| Qinghai          | Golog      | 632600 | -3.6 |
| Qinghai          | Yushu      | 632700 | -3.6 |
| Qinghai          | Haixi      | 632800 | -3.6 |
| <b>Northwest</b> |            |        |      |
| Shaanxi          | Xi'an      | 610100 | -3.6 |
| Shaanxi          | Tongchuan  | 610200 | -3.6 |
| Shaanxi          | Baoji      | 610300 | -3.6 |
| Shaanxi          | Xianyang   | 610400 | -3.6 |
| Shaanxi          | Weinan     | 610500 | -3.6 |
| Shaanxi          | Yan'an     | 610600 | -3.6 |
| Shaanxi          | Hanzhong   | 610700 | -1.3 |
| Shaanxi          | Yulin      | 610800 | -3.6 |
| Shaanxi          | Ankang     | 610900 | -1.7 |
| Shaanxi          | Shangluo   | 611000 | -3.6 |
| Shaanxi          | Xixian     | 611100 | -3.6 |
| Gansu            | Lanzhou    | 620100 | -3.6 |
| Gansu            | Jiayuguan  | 620200 | -3.6 |
| Gansu            | Jinchang   | 620300 | -3.6 |
| Gansu            | Baiyin     | 620400 | -3.6 |
| Gansu            | Tianshui   | 620500 | -3.6 |
| Gansu            | Wuwei      | 620600 | -3.6 |
| Gansu            | Zhangye    | 620700 | -3.6 |
| Gansu            | Pingliang  | 620800 | -3.6 |
| Gansu            | Jiuquan    | 620900 | -3.6 |
| Gansu            | Qingyang   | 621000 | -3.6 |
| Gansu            | Dingxi     | 621100 | -3.6 |
| Gansu            | Longnan    | 621200 | -1.0 |
| Gansu            | Linxia     | 622900 | -3.6 |
| Gansu            | Gannan     | 623000 | -3.6 |
| Ningxia          | Yinchuan   | 640100 | -3.6 |
| Ningxia          | Shizuishan | 640200 | -3.6 |
| Ningxia          | Wuzhong    | 640300 | -3.6 |
| Ningxia          | Guyuan     | 640400 | -3.6 |
| Ningxia          | Zhongwei   | 640500 | -3.6 |
| Xinjiang         | Urumqi     | 650100 | -3.6 |
| Xinjiang         | Karamay    | 650200 | -3.6 |
| Xinjiang         | Turpan     | 652100 | -3.6 |
| Xinjiang         | Hami       | 652200 | -3.6 |
| Xinjiang         | Changji    | 652300 | -3.6 |
| Xinjiang         | Bortala    | 652700 | -3.6 |
| Xinjiang         | Bayingol   | 652800 | -3.6 |
| Xinjiang         | Aksu       | 652900 | -3.6 |
| Xinjiang         | Kizilsu    | 653000 | 5.5  |
| Xinjiang         | Kashgar    | 653100 | -3.6 |
| Xinjiang         | Hotan      | 653200 | -1.9 |
| Xinjiang         | Ili        | 654000 | -3.6 |

|          |         |        |      |
|----------|---------|--------|------|
| Xinjiang | Qoqek   | 654200 | -3.6 |
| Xinjiang | Altay   | 654300 | -3.6 |
| Xinjiang | Shihezi | 659100 | -3.6 |
| Xinjiang | Aral    | 659200 | -3.6 |
| Xinjiang | Tumxuk  | 659300 | -3.6 |
| Xinjiang | Wujiaqu | 659400 | -3.6 |

---

Note: CJP, county under the jurisdiction of province; HFMD, hand, foot, and mouth disease.

**Table S3.** Results of Cochran Q test and values of  $I^2$  statistic for each estimate pooled at province level.

| <b>Province or municipality<sup>a</sup></b> | <b>Q test</b> | <b>P value of Q test</b> | <b><math>I^2</math> (%)</b> |
|---------------------------------------------|---------------|--------------------------|-----------------------------|
| <b>Northeast</b>                            |               |                          |                             |
| Heilongjiang                                | 90.78         | 0.000                    | 70.26                       |
| Jilin                                       | 48.15         | 0.002                    | 50.16                       |
| Liaoning                                    | 90.83         | 0.000                    | 57.06                       |
| <b>Inner Mongolia</b>                       |               |                          |                             |
| Inner Mongolia                              | 46.22         | 0.063                    | 28.60                       |
| <b>North</b>                                |               |                          |                             |
| Beijing <sup>b</sup>                        | —             | —                        | —                           |
| Tianjin <sup>b</sup>                        | —             | —                        | —                           |
| Hebei                                       | 56.57         | 0.000                    | 57.58                       |
| Shanxi                                      | 23.25         | 0.079                    | 35.48                       |
| <b>Northwest</b>                            |               |                          |                             |
| Xinjiang                                    | 106.70        | 0.000                    | 52.20                       |
| Ningxia                                     | 25.12         | 0.014                    | 52.24                       |
| Gansu                                       | 69.47         | 0.000                    | 61.13                       |
| Shaanxi                                     | 50.02         | 0.005                    | 46.02                       |
| <b>East</b>                                 |               |                          |                             |
| Shandong                                    | 96.41         | 0.000                    | 62.66                       |
| Jiangsu                                     | 59.10         | 0.009                    | 39.09                       |
| Anhui                                       | 87.04         | 0.000                    | 48.30                       |
| Shanghai <sup>b</sup>                       | —             | —                        | —                           |
| Zhejiang                                    | 33.91         | 0.284                    | 11.54                       |
| Jiangxi                                     | 54.73         | 0.001                    | 50.67                       |
| Fujian                                      | 49.33         | 0.002                    | 51.35                       |
| <b>Central region</b>                       |               |                          |                             |
| Henan                                       | 95.72         | 0.000                    | 46.72                       |
| Hubei                                       | 114.06        | 0.000                    | 60.55                       |
| Hunan                                       | 67.97         | 0.001                    | 47.03                       |
| <b>Qingzang</b>                             |               |                          |                             |
| Qinghai                                     | 21.12         | 0.133                    | 28.97                       |
| Tibet                                       | 32.92         | 0.017                    | 45.32                       |
| <b>Southwest</b>                            |               |                          |                             |
| Sichuan                                     | 124.06        | 0.000                    | 58.89                       |
| Chongqing <sup>b</sup>                      | —             | —                        | —                           |
| Guizhou                                     | 46.79         | 0.004                    | 48.71                       |
| Yunnan                                      | 77.58         | 0.000                    | 53.59                       |
| <b>South</b>                                |               |                          |                             |
| Guangdong                                   | 119.63        | 0.000                    | 49.85                       |
| Guangxi                                     | 84.45         | 0.000                    | 53.82                       |
| Hainan                                      | 124.24        | 0.000                    | 61.36                       |

<sup>a</sup>Provinces or municipalities are sorted by region and ordered by latitude from high to low.

<sup>b</sup>No data for municipalities are provided as they are treated as mega-cities in this study.

**Table S4.** Projected percentage change (and 95% eCIs) in HFMD incidence among children aged 0–14 years due to climate change (RCP 4.5 and 8.5 scenarios) by site and decade relative to baseline estimates for 2009–2014, holding population sizes and temperature-HFMD associations constant over time.

| Province or municipality | Prefecture/CJP | RCP 4.5 (percentage change and 95% eCI) |                   |                  | RCP 8.5 (percentage change and 95% eCI) |                   |                    |
|--------------------------|----------------|-----------------------------------------|-------------------|------------------|-----------------------------------------|-------------------|--------------------|
|                          |                | 2030s                                   | 2050s             | 2090s            | 2030s                                   | 2050s             | 2090s              |
| <b>North</b>             |                |                                         |                   |                  |                                         |                   |                    |
| Beijing                  | Beijing        | 1.8 (-1.9, 5.5)                         | 3.2 (-0.2, 6.6)   | 4.2 (0.0, 8.4)   | 2.4 (-1.0, 5.8)                         | 4.9 (1.3, 8.4)    | 9.0 (3.7, 14.3)    |
| Tianjin                  | Tianjin        | 1.1 (-1.7, 4.0)                         | 1.8 (-1.1, 4.8)   | 2.3 (-0.9, 5.5)  | 1.6 (-1.2, 4.3)                         | 2.9 (-0.3, 6.1)   | 4.6 (-0.5, 9.8)    |
| Hebei                    | Shijiazhuang   | 1.2 (-1.4, 3.9)                         | 2.4 (-0.2, 4.9)   | 3.2 (-0.5, 6.8)  | 1.9 (-0.9, 4.7)                         | 3.9 (0.6, 7.1)    | 6.3 (1.7, 11.0)    |
| Hebei                    | Tangshan       | 1.6 (-2.1, 5.3)                         | 2.9 (-0.8, 6.5)   | 3.8 (-0.1, 7.7)  | 2.5 (-1.0, 5.9)                         | 4.9 (1.5, 8.2)    | 8.9 (3.5, 14.3)    |
| Hebei                    | Qinhuangdao    | 2.5 (-1.7, 6.6)                         | 4.3 (-0.1, 8.6)   | 5.8 (1.1, 10.4)  | 3.4 (-1.0, 7.8)                         | 6.6 (2.5, 10.6)   | 12.4 (5.8, 19.0)   |
| Hebei                    | Handan         | 1.3 (-1.6, 4.3)                         | 2.3 (-0.7, 5.3)   | 3.1 (-0.7, 6.9)  | 1.9 (-0.9, 4.6)                         | 3.7 (0.5, 7.0)    | 6.3 (1.2, 11.4)    |
| Hebei                    | Xingtai        | 1.3 (-1.6, 4.3)                         | 2.3 (-0.7, 5.3)   | 3.1 (-0.7, 6.9)  | 1.9 (-0.9, 4.6)                         | 3.7 (0.5, 7.0)    | 6.3 (1.2, 11.4)    |
| Hebei                    | Baoding        | 1.6 (-1.6, 4.8)                         | 2.8 (-0.6, 6.2)   | 3.7 (-0.3, 7.6)  | 2.1 (-1.0, 5.1)                         | 4.3 (0.8, 7.8)    | 7.8 (2.3, 13.3)    |
| Hebei                    | Zhangjiakou    | 2.5 (-1.7, 6.8)                         | 4.4 (0.1, 8.8)    | 6.1 (0.2, 12.0)  | 3.5 (-0.6, 7.5)                         | 7.0 (3.0, 10.9)   | 13.3 (6.6, 19.9)   |
| Hebei                    | Chengde        | 2.1 (-1.5, 5.6)                         | 3.5 (0.0, 7.0)    | 4.8 (0.4, 9.2)   | 3.0 (-0.6, 6.6)                         | 5.9 (1.9, 9.9)    | 11.4 (5.4, 17.5)   |
| Hebei                    | Cangzhou       | 1.4 (-1.6, 4.3)                         | 2.3 (-0.6, 5.3)   | 3.1 (-0.3, 6.4)  | 1.8 (-0.9, 4.5)                         | 3.6 (0.8, 6.5)    | 6.7 (2.3, 11.0)    |
| Hebei                    | Langfang       | 1.6 (-1.9, 5.1)                         | 2.9 (-0.3, 6.2)   | 3.8 (-0.2, 7.8)  | 2.2 (-1.1, 5.6)                         | 4.4 (0.8, 8.0)    | 8.2 (2.9, 13.6)    |
| Hebei                    | Hengshui       | 1.3 (-1.3, 3.9)                         | 2.3 (-0.5, 5.1)   | 3.1 (-0.4, 6.6)  | 1.8 (-0.8, 4.4)                         | 3.7 (0.7, 6.7)    | 6.7 (1.4, 12.0)    |
| Shanxi                   | Taiyuan        | 2.9 (-1.1, 6.8)                         | 5.4 (0.9, 9.9)    | 7.7 (0.3, 15.0)  | 3.9 (0.5, 7.3)                          | 8.7 (3.1, 14.4)   | 18.2 (7.9, 28.6)   |
| Shanxi                   | Datong         | 4.0 (-1.0, 9.0)                         | 7.2 (1.9, 12.5)   | 10.3 (1.3, 19.2) | 5.0 (1.3, 8.6)                          | 11.4 (5.3, 17.5)  | 24.9 (12.3, 37.5)  |
| Shanxi                   | Yangquan       | 2.5 (-1.1, 6.1)                         | 4.7 (0.8, 8.6)    | 6.5 (0.7, 12.4)  | 3.4 (0.4, 6.3)                          | 7.4 (3.0, 11.9)   | 15.3 (6.9, 23.7)   |
| Shanxi                   | Changzhi       | 3.2 (-1.1, 7.4)                         | 5.7 (0.7, 10.8)   | 8.2 (0.1, 16.2)  | 4.1 (0.4, 7.8)                          | 9.1 (3.0, 15.3)   | 19.1 (8.0, 30.2)   |
| Shanxi                   | Jincheng       | 2.5 (-0.6, 5.7)                         | 4.8 (1.0, 8.5)    | 6.5 (0.8, 12.2)  | 3.3 (0.3, 6.3)                          | 7.2 (2.0, 12.3)   | 15.1 (6.9, 23.3)   |
| Shanxi                   | Shuozhou       | 4.6 (-0.6, 9.7)                         | 8.6 (2.2, 15.0)   | 12.2 (0.7, 23.7) | 6.1 (1.3, 11.0)                         | 14.1 (5.3, 22.8)  | 30.1 (12.5, 47.6)  |
| Shanxi                   | Jinzhong       | 2.9 (-1.1, 6.8)                         | 5.4 (0.9, 9.9)    | 7.7 (0.3, 15.0)  | 3.9 (0.5, 7.3)                          | 8.7 (3.1, 14.4)   | 18.2 (7.9, 28.6)   |
| Shanxi                   | Yuncheng       | 2.3 (-0.7, 5.3)                         | 4.5 (1.0, 7.9)    | 6.2 (1.0, 11.5)  | 3.3 (0.3, 6.3)                          | 7.1 (2.4, 11.8)   | 14.7 (7.6, 21.8)   |
| Shanxi                   | Xinzhou        | 3.4 (-0.9, 7.6)                         | 6.2 (1.3, 11.1)   | 8.8 (0.6, 17.0)  | 4.4 (0.7, 8.0)                          | 9.9 (3.6, 16.3)   | 21.1 (9.3, 32.8)   |
| Shanxi                   | Linfen         | 2.6 (-0.9, 6.2)                         | 4.9 (1.0, 8.8)    | 6.9 (0.8, 13.0)  | 3.6 (0.3, 6.9)                          | 7.8 (2.5, 13.1)   | 15.9 (7.1, 24.8)   |
| Shanxi                   | Lvliang        | 3.3 (-0.8, 7.4)                         | 6.3 (1.4, 11.2)   | 9.0 (0.9, 17.2)  | 4.4 (0.5, 8.4)                          | 10.1 (3.3, 17.0)  | 21.1 (8.7, 33.6)   |
| <b>Inner Mongolia</b>    |                |                                         |                   |                  |                                         |                   |                    |
| Inner Mongolia           | Hohhot         | 4.9 (-1.0, 10.8)                        | 8.9 (2.2, 15.7)   | 12.3 (2.3, 22.4) | 6.2 (0.9, 11.4)                         | 13.5 (7.7, 19.3)  | 28.8 (16.9, 40.6)  |
| Inner Mongolia           | Baotou         | 4.4 (-1.1, 9.8)                         | 8.4 (2.1, 14.7)   | 11.3 (1.9, 20.7) | 5.7 (1.5, 9.8)                          | 12.7 (6.3, 19.1)  | 27.0 (14.9, 39.0)  |
| Inner Mongolia           | Wuhai          | 3.7 (-0.3, 7.7)                         | 6.9 (2.4, 11.4)   | 9.5 (2.1, 16.8)  | 4.7 (1.6, 7.7)                          | 10.6 (4.7, 16.5)  | 21.8 (11.4, 32.2)  |
| Inner Mongolia           | Chifeng        | 4.4 (-1.8, 10.7)                        | 7.7 (1.1, 14.2)   | 10.6 (2.2, 19.0) | 5.9 (-0.4, 12.2)                        | 11.9 (5.9, 17.9)  | 25.4 (14.7, 36.1)  |
| Inner Mongolia           | Tongliao       | 5.2 (-2.8, 13.2)                        | 8.6 (0.8, 16.5)   | 12.4 (2.1, 22.7) | 6.5 (-0.8, 13.7)                        | 13.6 (5.6, 21.5)  | 30.2 (17.9, 42.5)  |
| Inner Mongolia           | Ordos          | 4.7 (-0.9, 10.4)                        | 9.2 (2.6, 15.8)   | 12.8 (2.9, 22.6) | 6.1 (1.7, 10.5)                         | 13.8 (6.8, 20.9)  | 29.3 (16.6, 42.1)  |
| Inner Mongolia           | Hulunber       | 14.6 (-8.0, 37.3)                       | 25.4 (-0.4, 51.3) | 33.4 (2.2, 64.6) | 19.1 (-1.1, 39.3)                       | 39.7 (15.0, 64.5) | 90.8 (55.7, 125.9) |
| Inner Mongolia           | Bayan Nur      | 4.7 (-1.3, 10.8)                        | 9.1 (2.5, 15.6)   | 12.2 (2.3, 22.1) | 6.4 (2.2, 10.5)                         | 13.8 (6.4, 21.1)  | 28.7 (15.7, 41.7)  |
| Inner Mongolia           | Ulanqab        | 6.2 (-1.1, 13.5)                        | 11.4 (3.0, 19.8)  | 16.0 (3.3, 28.8) | 7.8 (1.6, 13.9)                         | 17.7 (10.2, 25.2) | 37.6 (21.8, 53.3)  |
| Inner Mongolia           | Hinggan        | 6.8 (-3.2, 16.9)                        | 11.1 (-1.0, 23.3) | 15.5 (2.1, 28.9) | 8.5 (0.8, 16.2)                         | 17.3 (8.6, 26.0)  | 39.3 (24.0, 54.7)  |
| Inner Mongolia           | Xilin Gol      | 7.7 (-4.7, 20.1)                        | 14.9 (-0.6, 30.4) | 21.8 (1.2, 42.4) | 9.3 (-2.4, 20.9)                        | 24.2 (9.5, 39.0)  | 53.9 (30.9, 76.9)  |
| Inner Mongolia           | Alxa           | 4.5 (-0.6, 9.6)                         | 8.3 (2.6, 13.9)   | 11.3 (3.1, 19.5) | 5.5 (1.6, 9.4)                          | 12.3 (3.9, 20.6)  | 25.6 (12.9, 38.4)  |
| <b>Northeast</b>         |                |                                         |                   |                  |                                         |                   |                    |
| Liaoning                 | Shenyang       | 5.6 (-1.4, 12.6)                        | 9.7 (1.4, 17.9)   | 13.7 (2.2, 25.2) | 6.2 (1.7, 10.6)                         | 14.4 (8.2, 20.7)  | 33.2 (20.8, 45.6)  |
| Liaoning                 | Dalian         | 5.5 (-0.9, 11.9)                        | 10.5 (0.8, 20.2)  | 14.4 (1.8, 27.1) | 6.2 (0.4, 12.0)                         | 14.8 (6.5, 23.1)  | 32.6 (15.8, 49.5)  |
| Liaoning                 | Anshan         | 5.3 (-1.1, 11.7)                        | 9.5 (1.3, 17.6)   | 13.1 (2.2, 24.0) | 6.1 (1.6, 10.6)                         | 13.8 (7.4, 20.2)  | 31.3 (18.4, 44.1)  |
| Liaoning                 | Fushun         | 5.6 (-1.4, 12.6)                        | 9.7 (1.4, 17.9)   | 13.7 (2.2, 25.2) | 6.2 (1.7, 10.6)                         | 14.4 (8.2, 20.7)  | 33.2 (20.8, 45.6)  |
| Liaoning                 | Benxi          | 5.3 (-1.1, 11.6)                        | 9.5 (1.2, 17.7)   | 13.1 (2.3, 23.8) | 6.1 (1.7, 10.5)                         | 13.9 (7.6, 20.2)  | 31.6 (18.9, 44.2)  |
| Liaoning                 | Dandong        | 4.9 (-0.8, 10.5)                        | 9.1 (2.2, 16.0)   | 12.3 (3.0, 21.6) | 5.7 (1.3, 10.1)                         | 13.2 (7.6, 18.7)  | 29.7 (18.4, 41.1)  |
| Liaoning                 | Jinzhou        | 4.6 (-0.1, 9.4)                         | 8.3 (1.7, 14.9)   | 11.6 (1.9, 21.3) | 5.3 (1.1, 9.4)                          | 12.4 (6.6, 18.1)  | 27.8 (15.1, 40.4)  |
| Liaoning                 | Yingkou        | 4.4 (-0.5, 9.3)                         | 7.9 (1.4, 14.3)   | 11.1 (1.9, 20.3) | 4.9 (1.1, 8.8)                          | 11.6 (6.3, 17.0)  | 26.2 (14.0, 38.3)  |
| Liaoning                 | Fuxin          | 5.1 (-0.7, 10.9)                        | 8.4 (1.5, 15.4)   | 11.8 (1.4, 22.3) | 5.6 (1.6, 9.6)                          | 12.7 (6.8, 18.6)  | 29.0 (15.8, 42.2)  |
| Liaoning                 | Liaoyang       | 5.2 (-1.1, 11.4)                        | 9.0 (1.0, 17.0)   | 12.5 (2.1, 23.0) | 5.8 (1.6, 9.9)                          | 13.1 (6.9, 19.2)  | 29.7 (17.4, 42.1)  |
| Liaoning                 | Panjin         | 4.4 (-0.5, 9.3)                         | 7.9 (1.4, 14.3)   | 11.1 (1.9, 20.3) | 4.9 (1.1, 8.8)                          | 11.6 (6.3, 17.0)  | 26.2 (14.0, 38.3)  |
| Liaoning                 | Tieling        | 5.8 (-1.0, 12.6)                        | 9.8 (1.8, 17.7)   | 13.7 (2.4, 25.0) | 6.3 (2.2, 10.4)                         | 14.4 (8.0, 20.8)  | 33.3 (21.2, 45.5)  |
| Liaoning                 | Chaoyang       | 5.2 (-0.4, 10.8)                        | 9.2 (1.5, 16.9)   | 13.0 (1.5, 24.5) | 6.3 (1.4, 11.1)                         | 14.2 (7.7, 20.7)  | 32.1 (17.3, 46.8)  |
| Liaoning                 | Huludao        | 4.5 (-0.2, 9.3)                         | 8.1 (1.6, 14.7)   | 11.5 (1.6, 21.4) | 5.1 (1.1, 9.0)                          | 12.1 (6.5, 17.7)  | 27.0 (14.3, 39.7)  |
| Jilin                    | Changchun      | 5.7 (-1.3, 12.7)                        | 9.6 (-0.2, 19.3)  | 13.5 (0.8, 26.2) | 6.4 (1.9, 10.9)                         | 14.3 (7.1, 21.4)  | 32.9 (19.9, 45.9)  |
| Jilin                    | Jilin          | 5.5 (-1.7, 12.7)                        | 9.7 (-0.6, 19.9)  | 13.7 (0.3, 27.1) | 6.6 (2.4, 10.8)                         | 15.1 (7.2, 22.9)  | 34.9 (20.8, 49.1)  |

|              |              |                   |                    |                     |                   |                     |                      |
|--------------|--------------|-------------------|--------------------|---------------------|-------------------|---------------------|----------------------|
| Jilin        | Siping       | 5.1 (-1.1, 11.2)  | 8.2 (0.3, 16.1)    | 11.9 (1.0, 22.9)    | 5.6 (1.5, 9.7)    | 13.0 (6.0, 20.1)    | 30.7 (19.0, 42.5)    |
| Jilin        | Liaoyuan     | 5.6 (-1.1, 12.3)  | 9.6 (0.8, 18.4)    | 13.3 (1.3, 25.4)    | 6.4 (2.4, 10.4)   | 14.4 (7.3, 21.5)    | 33.0 (20.1, 45.9)    |
| Jilin        | Tonghua      | 5.3 (-1.4, 12.1)  | 9.4 (0.8, 18.0)    | 13.1 (1.9, 24.3)    | 6.3 (1.8, 10.7)   | 14.4 (7.4, 21.3)    | 32.4 (19.7, 45.0)    |
| Jilin        | Baishan      | 5.2 (-1.1, 11.6)  | 9.2 (0.8, 17.5)    | 12.7 (1.7, 23.7)    | 5.9 (1.8, 9.9)    | 13.6 (6.6, 20.5)    | 30.9 (18.1, 43.7)    |
| Jilin        | Songyuan     | 5.6 (-0.8, 11.9)  | 9.0 (0.0, 18.1)    | 12.3 (0.3, 24.2)    | 6.0 (1.6, 10.5)   | 13.5 (6.6, 20.5)    | 31.5 (17.4, 45.5)    |
| Jilin        | Baicheng     | 5.4 (-0.8, 11.5)  | 8.7 (-0.3, 17.6)   | 12.0 (-0.3, 24.3)   | 6.0 (1.1, 10.9)   | 13.4 (5.8, 20.9)    | 31.3 (16.5, 46.1)    |
| Jilin        | Yanbian      | 5.4 (-1.7, 12.5)  | 9.5 (-1.0, 20.0)   | 13.4 (0.7, 26.2)    | 6.1 (2.5, 9.7)    | 14.0 (6.3, 21.7)    | 32.4 (19.0, 45.8)    |
| Heilongjiang | Harbin       | 5.7 (-1.4, 12.7)  | 9.5 (-0.4, 19.5)   | 13.0 (0.1, 25.9)    | 6.2 (1.7, 10.8)   | 14.2 (6.6, 21.8)    | 33.2 (19.5, 46.9)    |
| Heilongjiang | Qiqihar      | 5.8 (-1.3, 12.8)  | 9.7 (-0.3, 19.7)   | 13.2 (-0.8, 27.2)   | 6.9 (1.5, 12.3)   | 14.7 (6.7, 22.6)    | 34.3 (19.1, 49.5)    |
| Heilongjiang | Jixi         | 5.7 (-0.7, 12.0)  | 9.9 (0.1, 19.7)    | 13.4 (1.5, 25.4)    | 6.5 (2.3, 10.8)   | 14.7 (7.6, 21.8)    | 33.9 (21.6, 46.3)    |
| Heilongjiang | Hegang       | 5.5 (-0.7, 11.7)  | 9.6 (-1.4, 20.6)   | 13.2 (-0.3, 26.7)   | 6.4 (1.6, 11.1)   | 14.7 (7.1, 22.3)    | 35.2 (20.5, 49.8)    |
| Heilongjiang | Shuangyashan | 5.5 (-0.7, 11.7)  | 9.6 (-1.4, 20.6)   | 13.2 (-0.3, 26.7)   | 6.4 (1.6, 11.1)   | 14.7 (7.1, 22.3)    | 35.2 (20.5, 49.8)    |
| Heilongjiang | Daqing       | 5.5 (-0.7, 11.6)  | 9.0 (-1.3, 19.2)   | 12.1 (-1.2, 25.4)   | 6.3 (1.6, 11.1)   | 13.7 (5.5, 21.8)    | 33.5 (18.7, 48.3)    |
| Heilongjiang | Yichun       | 6.3 (-0.6, 13.2)  | 11.3 (0.0, 22.6)   | 15.5 (1.7, 29.3)    | 8.0 (2.5, 13.5)   | 17.0 (9.8, 24.2)    | 39.6 (23.6, 55.5)    |
| Heilongjiang | Jiamusi      | 5.5 (-0.7, 11.7)  | 9.6 (-1.4, 20.6)   | 13.2 (-0.3, 26.7)   | 6.4 (1.6, 11.1)   | 14.7 (7.1, 22.3)    | 35.2 (20.5, 49.8)    |
| Heilongjiang | Qitaihe      | 5.7 (-0.7, 12.0)  | 9.9 (0.1, 19.7)    | 13.4 (1.5, 25.4)    | 6.5 (2.3, 10.8)   | 14.7 (7.6, 21.8)    | 33.9 (21.6, 46.3)    |
| Heilongjiang | Mudanjiang   | 5.8 (-1.3, 12.9)  | 9.9 (-0.4, 20.2)   | 13.8 (1.0, 26.5)    | 6.4 (2.4, 10.4)   | 14.8 (7.3, 22.3)    | 34.5 (21.4, 47.6)    |
| Heilongjiang | Heihe        | 6.2 (-0.5, 13.0)  | 11.6 (0.0, 23.1)   | 15.5 (1.5, 29.5)    | 8.5 (2.5, 14.6)   | 18.0 (7.9, 28.1)    | 41.9 (22.7, 61.2)    |
| Heilongjiang | Suihua       | 5.5 (-1.6, 12.6)  | 9.8 (-1.5, 21.1)   | 13.3 (-1.3, 28.0)   | 6.0 (0.7, 11.3)   | 14.5 (4.7, 24.3)    | 36.4 (21.4, 51.3)    |
| Heilongjiang | DaXingAnLing | 6.9 (-1.6, 15.4)  | 13.1 (-0.2, 26.4)  | 17.5 (1.5, 33.4)    | 9.3 (2.4, 16.2)   | 20.0 (8.3, 31.7)    | 47.0 (25.5, 68.5)    |
| <b>East</b>  |              |                   |                    |                     |                   |                     |                      |
| Shanghai     | Shanghai     | -1.0 (-3.1, 1.1)  | -2.0 (-5.2, 1.1)   | -2.9 (-7.0, 1.3)    | -1.2 (-4.6, 2.1)  | -3.1 (-7.0, 0.9)    | -8.5 (-15.8, -1.2)   |
| Jiangsu      | Nanjing      | -2.6 (-5.6, 0.4)  | -5.1 (-10.3, 0.1)  | -7.1 (-14.5, 0.3)   | -3.2 (-8.8, 2.3)  | -7.7 (-15.7, 0.2)   | -18.8 (-30.8, -6.8)  |
| Jiangsu      | Wuxi         | -2.9 (-6.4, 0.5)  | -5.6 (-11.4, 0.2)  | -7.9 (-15.3, -0.6)  | -3.5 (-9.5, 2.6)  | -8.6 (-17.3, 0.0)   | -20.8 (-35.2, -6.3)  |
| Jiangsu      | Xuzhou       | -2.0 (-5.9, 1.8)  | -4.0 (-9.2, 1.3)   | -5.9 (-13.3, 1.6)   | -2.6 (-7.5, 2.3)  | -5.9 (-12.9, 1.2)   | -15.3 (-27.7, -2.9)  |
| Jiangsu      | Changzhou    | -2.9 (-6.4, 0.5)  | -5.6 (-11.4, 0.2)  | -7.9 (-15.3, -0.6)  | -3.5 (-9.5, 2.6)  | -8.6 (-17.3, 0.0)   | -20.8 (-35.2, -6.3)  |
| Jiangsu      | Suzhou       | -3.0 (-6.9, 0.9)  | -5.8 (-11.9, 0.3)  | -8.2 (-16.8, 0.4)   | -4.1 (-10.0, 1.8) | -9.0 (-17.9, -0.2)  | -21.5 (-36.5, -6.5)  |
| Jiangsu      | Nantong      | -2.4 (-5.6, 0.9)  | -4.6 (-10.0, 0.9)  | -6.5 (-13.5, 0.5)   | -3.1 (-8.0, 1.8)  | -7.2 (-14.9, 0.6)   | -17.3 (-30.1, -4.5)  |
| Jiangsu      | Lianyungang  | -1.2 (-5.4, 3.0)  | -2.5 (-8.8, 3.8)   | -4.1 (-12.3, 4.1)   | -1.5 (-6.1, 3.1)  | -4.0 (-10.8, 2.8)   | -11.1 (-25.0, 2.8)   |
| Jiangsu      | Huai'an      | -1.9 (-5.5, 1.8)  | -3.8 (-9.4, 1.7)   | -5.5 (-12.6, 1.7)   | -2.8 (-8.3, 2.7)  | -6.1 (-13.5, 1.4)   | -15.1 (-27.0, -3.2)  |
| Jiangsu      | Yancheng     | -2.2 (-5.9, 1.6)  | -4.6 (-11.4, 2.1)  | -6.7 (-15.2, 1.8)   | -2.9 (-8.2, 2.4)  | -7.1 (-15.8, 1.6)   | -18.0 (-33.9, -2.2)  |
| Jiangsu      | Yangzhou     | -2.0 (-5.2, 1.2)  | -3.8 (-9.2, 1.6)   | -5.3 (-12.1, 1.5)   | -2.5 (-7.8, 2.8)  | -5.7 (-12.6, 1.1)   | -14.3 (-25.0, -3.5)  |
| Jiangsu      | Zhenjiang    | -2.6 (-5.6, 0.4)  | -5.1 (-10.3, 0.1)  | -7.1 (-14.5, 0.3)   | -3.2 (-8.8, 2.3)  | -7.7 (-15.7, 0.2)   | -18.8 (-30.8, -6.8)  |
| Jiangsu      | Taizhou      | -2.0 (-5.2, 1.2)  | -3.8 (-9.2, 1.6)   | -5.3 (-12.1, 1.5)   | -2.5 (-7.8, 2.8)  | -5.7 (-12.6, 1.1)   | -14.3 (-25.0, -3.5)  |
| Jiangsu      | Suqian       | -1.9 (-5.5, 1.8)  | -3.8 (-9.4, 1.7)   | -5.5 (-12.6, 1.7)   | -2.8 (-8.3, 2.7)  | -6.1 (-13.5, 1.4)   | -15.1 (-27.0, -3.2)  |
| Zhejiang     | Hangzhou     | -3.0 (-7.6, 1.6)  | -6.3 (-13.6, 1.1)  | -9.1 (-19.0, 0.8)   | -4.4 (-12.2, 3.4) | -9.9 (-20.6, 0.9)   | -25.8 (-45.4, -6.3)  |
| Zhejiang     | Ningbo       | -3.1 (-8.4, 2.2)  | -6.2 (-14.7, 2.2)  | -9.0 (-20.2, 2.2)   | -4.1 (-11.2, 3.0) | -9.4 (-19.8, 1.0)   | -26.1 (-47.0, -5.3)  |
| Zhejiang     | Wenzhou      | -1.1 (-4.5, 2.3)  | -2.9 (-8.2, 2.5)   | -4.2 (-10.4, 1.9)   | -1.9 (-7.1, 3.4)  | -4.5 (-10.9, 1.9)   | -14.3 (-26.8, -1.8)  |
| Zhejiang     | Jiaxing      | -2.6 (-6.9, 1.8)  | -5.2 (-12.8, 2.4)  | -7.4 (-17.7, 3.0)   | -3.6 (-10.2, 2.9) | -8.2 (-17.7, 1.3)   | -21.7 (-39.5, -4.0)  |
| Zhejiang     | Huzhou       | -2.9 (-7.3, 1.6)  | -6.1 (-13.9, 1.7)  | -8.9 (-19.6, 1.8)   | -4.5 (-11.0, 2.1) | -9.8 (-20.9, 1.3)   | -24.3 (-42.6, -6.1)  |
| Zhejiang     | Shaoxing     | -2.9 (-7.5, 1.6)  | -6.2 (-13.4, 1.1)  | -8.9 (-18.6, 0.8)   | -4.3 (-12.0, 3.4) | -9.7 (-20.3, 0.9)   | -25.4 (-44.6, -6.2)  |
| Zhejiang     | Jinhua       | -4.1 (-10.3, 2.0) | -8.6 (-16.9, -0.3) | -12.4 (-23.2, -1.6) | -6.0 (-14.7, 2.7) | -13.5 (-25.8, -1.2) | -33.7 (-56.2, -11.3) |
| Zhejiang     | Quzhou       | -3.4 (-8.5, 1.8)  | -7.1 (-15.5, 1.3)  | -10.5 (-21.1, 0.2)  | -5.0 (-13.0, 3.0) | -11.3 (-23.7, 1.1)  | -28.5 (-50.6, -6.3)  |
| Zhejiang     | Zhoushan     | -2.5 (-6.6, 1.6)  | -5.2 (-11.6, 1.2)  | -7.6 (-17.5, 2.2)   | -3.1 (-10.1, 3.9) | -7.8 (-17.3, 1.8)   | -22.3 (-41.4, -3.2)  |
| Zhejiang     | Taizhou      | -1.8 (-6.1, 2.5)  | -4.0 (-9.9, 2.0)   | -6.0 (-13.8, 1.9)   | -2.5 (-7.8, 2.8)  | -6.2 (-13.5, 1.0)   | -19.2 (-35.3, -3.1)  |
| Zhejiang     | Lishui       | -4.5 (-11.2, 2.1) | -9.2 (-17.8, -0.6) | -13.3 (-25.2, -1.5) | -6.0 (-14.4, 2.5) | -14.5 (-27.2, -1.9) | -37.5 (-62.2, -12.8) |
| Anhui        | Hefei        | -1.1 (-3.4, 1.2)  | -2.1 (-5.2, 1.1)   | -3.0 (-7.2, 1.2)    | -1.2 (-5.0, 2.6)  | -3.1 (-7.7, 1.5)    | -8.3 (-15.1, -1.5)   |
| Anhui        | Wuhu         | -1.0 (-3.3, 1.3)  | -2.1 (-5.4, 1.2)   | -3.1 (-7.5, 1.3)    | -1.2 (-4.7, 2.3)  | -3.2 (-7.8, 1.4)    | -8.4 (-15.2, -1.7)   |
| Anhui        | Bengbu       | -0.8 (-3.6, 2.1)  | -1.6 (-5.3, 2.2)   | -2.3 (-6.9, 2.3)    | -1.0 (-4.9, 2.9)  | -2.4 (-7.1, 2.3)    | -6.7 (-14.3, 1.0)    |
| Anhui        | Huainan      | -0.5 (-3.0, 2.1)  | -0.9 (-4.3, 2.4)   | -1.5 (-5.7, 2.7)    | -0.7 (-4.4, 3.1)  | -1.6 (-5.9, 2.8)    | -4.9 (-11.8, 2.1)    |
| Anhui        | Ma'anshan    | -0.9 (-3.0, 1.2)  | -1.8 (-4.8, 1.2)   | -2.5 (-6.5, 1.5)    | -1.0 (-4.5, 2.4)  | -2.7 (-7.1, 1.7)    | -7.4 (-13.7, -1.1)   |
| Anhui        | Huaibei      | -0.5 (-3.5, 2.5)  | -0.9 (-4.1, 2.2)   | -1.5 (-5.3, 2.2)    | -0.5 (-3.6, 2.6)  | -1.3 (-5.3, 2.8)    | -4.7 (-11.3, 2.0)    |
| Anhui        | Tongling     | -1.4 (-4.3, 1.5)  | -2.8 (-6.8, 1.1)   | -3.8 (-9.1, 1.4)    | -1.6 (-5.7, 2.5)  | -4.1 (-9.4, 1.2)    | -10.7 (-18.8, -2.6)  |
| Anhui        | Anqing       | -1.3 (-3.9, 1.4)  | -2.6 (-6.2, 1.0)   | -3.5 (-8.3, 1.3)    | -1.5 (-5.2, 2.3)  | -3.8 (-8.7, 1.1)    | -9.8 (-17.3, -2.4)   |
| Anhui        | Huangshan    | -1.2 (-4.1, 1.8)  | -2.5 (-6.9, 1.9)   | -3.7 (-8.9, 1.4)    | -1.6 (-5.7, 2.5)  | -3.9 (-9.5, 1.7)    | -10.9 (-20.2, -1.6)  |
| Anhui        | Chuzhou      | -0.8 (-3.1, 1.5)  | -1.5 (-4.6, 1.6)   | -2.2 (-6.0, 1.5)    | -1.0 (-4.5, 2.5)  | -2.3 (-6.5, 1.9)    | -6.6 (-13.0, -0.1)   |
| Anhui        | Fuyang       | -1.0 (-4.0, 2.1)  | -1.5 (-5.4, 2.4)   | -2.0 (-6.1, 2.0)    | -0.9 (-4.4, 2.6)  | -2.0 (-7.0, 2.9)    | -6.2 (-14.1, 1.8)    |
| Anhui        | Suzhou       | -0.5 (-3.5, 2.5)  | -0.9 (-4.1, 2.2)   | -1.5 (-5.3, 2.2)    | -0.5 (-3.6, 2.6)  | -1.3 (-5.3, 2.8)    | -4.7 (-11.3, 2.0)    |
| Anhui        | Lu'an        | -1.2 (-4.5, 2.0)  | -2.1 (-6.0, 1.8)   | -2.8 (-7.2, 1.6)    | -1.2 (-4.9, 2.4)  | -3.0 (-7.8, 1.8)    | -8.2 (-15.6, -0.8)   |
| Anhui        | Bozhou       | -0.7 (-3.2, 1.8)  | -1.1 (-3.9, 1.8)   | -1.6 (-5.0, 1.8)    | -0.5 (-3.4, 2.3)  | -1.5 (-5.7, 2.6)    | -5.0 (-12.4, 2.4)    |



|                       |              |                   |                   |                   |                  |                   |                     |
|-----------------------|--------------|-------------------|-------------------|-------------------|------------------|-------------------|---------------------|
| Anhui                 | Chizhou      | -1.3 (-3.9, 1.4)  | -2.6 (-6.2, 1.0)  | -3.5 (-8.3, 1.3)  | -1.5 (-5.2, 2.3) | -3.8 (-8.6, 1.1)  | -9.8 (-17.1, -2.4)  |
| Anhui                 | Xuancheng    | -1.0 (-3.3, 1.4)  | -2.0 (-5.3, 1.4)  | -2.8 (-7.0, 1.4)  | -1.0 (-5.1, 3.0) | -3.0 (-8.0, 2.1)  | -8.4 (-16.0, -0.8)  |
| Fujian                | Fuzhou       | 4.2 (-2.0, 10.5)  | 5.7 (-3.6, 15.1)  | 6.9 (-4.5, 18.3)  | 3.2 (-1.7, 8.1)  | 6.7 (-2.9, 16.3)  | 4.3 (-14.6, 23.3)   |
| Fujian                | Xiamen       | 4.1 (0.1, 8.0)    | 5.7 (-2.0, 13.4)  | 7.1 (-1.4, 15.6)  | 3.7 (-1.6, 9.0)  | 6.9 (-0.8, 14.5)  | 4.9 (-7.1, 16.9)    |
| Fujian                | Putian       | 5.7 (-0.5, 11.9)  | 9.0 (-1.4, 19.4)  | 12.0 (-0.2, 24.1) | 5.7 (0.4, 11.0)  | 11.6 (1.5, 21.6)  | 15.7 (0.6, 30.8)    |
| Fujian                | Sanming      | 7.5 (-1.4, 16.4)  | 9.9 (-4.9, 24.7)  | 13.4 (-3.7, 30.4) | 6.4 (-3.4, 16.2) | 13.3 (-4.3, 30.8) | 12.7 (-18.8, 44.3)  |
| Fujian                | Quanzhou     | 5.6 (-0.5, 11.7)  | 8.8 (-1.3, 19.0)  | 11.7 (-0.2, 23.7) | 5.6 (0.4, 10.8)  | 11.3 (1.5, 21.2)  | 15.4 (0.6, 30.2)    |
| Fujian                | Zhangzhou    | 3.3 (-0.4, 7.1)   | 4.5 (-2.9, 11.9)  | 5.6 (-2.4, 13.6)  | 3.1 (-1.3, 7.5)  | 5.6 (-1.2, 12.5)  | 2.6 (-9.5, 14.7)    |
| Fujian                | Nanping      | 6.3 (-4.1, 16.7)  | 8.5 (-5.7, 22.7)  | 11.5 (-5.9, 29.0) | 5.4 (-3.1, 14.0) | 11.4 (-4.1, 27.0) | 11.2 (-18.7, 41.1)  |
| Fujian                | Longyan      | 4.9 (0.0, 9.7)    | 7.6 (-1.1, 16.4)  | 9.9 (-0.3, 20.1)  | 5.1 (-1.2, 11.4) | 10.6 (-1.2, 22.5) | 13.0 (-6.7, 32.7)   |
| Fujian                | Ningde       | 13.1 (-1.6, 27.8) | 23.0 (4.1, 41.9)  | 32.6 (7.5, 57.8)  | 15.4 (0.3, 30.6) | 33.8 (9.7, 57.8)  | 63.7 (21.5, 106.0)  |
| Jiangxi               | Nanchang     | 0.7 (-1.6, 3.0)   | 0.8 (-1.5, 3.1)   | 0.9 (-1.5, 3.3)   | 0.5 (-1.7, 2.7)  | 1.1 (-1.9, 4.0)   | 0.5 (-3.7, 4.7)     |
| Jiangxi               | Jingdezhen   | 0.7 (-1.2, 2.5)   | 0.9 (-1.8, 3.6)   | 1.1 (-1.9, 4.0)   | 0.6 (-2.0, 3.2)  | 1.2 (-2.1, 4.5)   | 0.5 (-4.6, 5.6)     |
| Jiangxi               | Pingxiang    | 0.9 (-1.3, 3.1)   | 1.5 (-1.8, 4.8)   | 1.7 (-1.4, 4.7)   | 0.9 (-1.5, 3.2)  | 1.9 (-1.1, 5.0)   | 1.7 (-3.0, 6.3)     |
| Jiangxi               | Jiujiang     | 5.2 (-1.4, 11.9)  | 9.5 (1.8, 17.1)   | 12.7 (2.4, 22.9)  | 6.1 (0.6, 11.7)  | 13.5 (5.0, 22.0)  | 24.9 (11.9, 37.9)   |
| Jiangxi               | Xinyu        | 0.9 (-1.3, 3.1)   | 1.5 (-1.8, 4.8)   | 1.7 (-1.4, 4.7)   | 0.9 (-1.5, 3.2)  | 1.9 (-1.1, 5.0)   | 1.7 (-3.0, 6.3)     |
| Jiangxi               | Yingtian     | 0.5 (-1.1, 2.2)   | 0.6 (-2.3, 3.4)   | 0.7 (-2.1, 3.5)   | 0.2 (-2.3, 2.8)  | 0.6 (-2.9, 4.1)   | -0.6 (-6.0, 4.8)    |
| Jiangxi               | Ganzhou      | 0.4 (-1.7, 2.6)   | 0.6 (-2.0, 3.3)   | 0.7 (-1.7, 3.0)   | 0.3 (-2.0, 2.5)  | 0.7 (-2.1, 3.6)   | -0.8 (-5.1, 3.6)    |
| Jiangxi               | Ji'an        | 0.6 (-1.6, 2.8)   | 1.0 (-2.2, 4.2)   | 1.0 (-2.2, 4.1)   | 0.6 (-1.9, 3.1)  | 1.2 (-2.0, 4.5)   | 0.2 (-4.7, 5.1)     |
| Jiangxi               | Yichun       | 0.8 (-1.3, 3.0)   | 1.5 (-1.7, 4.6)   | 1.6 (-1.3, 4.5)   | 0.8 (-1.4, 3.1)  | 1.9 (-1.0, 4.8)   | 1.6 (-2.8, 6.1)     |
| Jiangxi               | Fuzhou       | 0.8 (-1.1, 2.7)   | 1.2 (-2.0, 4.5)   | 1.4 (-1.5, 4.3)   | 0.7 (-1.6, 3.1)  | 1.6 (-1.3, 4.5)   | 0.9 (-3.8, 5.7)     |
| Jiangxi               | Shangrao     | 0.5 (-1.2, 2.2)   | 0.8 (-1.9, 3.5)   | 1.0 (-1.7, 3.6)   | 0.6 (-1.8, 3.0)  | 1.1 (-1.8, 3.9)   | 0.4 (-4.3, 5.1)     |
| Shandong              | Jinan        | 1.6 (-1.5, 4.7)   | 2.7 (-0.6, 6.0)   | 3.6 (-0.3, 7.6)   | 2.2 (-0.5, 4.9)  | 4.3 (1.3, 7.3)    | 7.8 (2.9, 12.6)     |
| Shandong              | Qingdao      | 1.6 (-1.3, 4.4)   | 2.7 (-0.5, 5.9)   | 3.6 (-0.4, 7.5)   | 1.9 (-0.5, 4.4)  | 4.0 (0.9, 7.1)    | 7.3 (2.7, 11.9)     |
| Shandong              | Zibo         | 1.8 (-1.4, 5.0)   | 3.1 (-0.5, 6.7)   | 4.0 (-0.1, 8.1)   | 2.1 (-0.6, 4.8)  | 4.6 (1.0, 8.2)    | 8.5 (2.8, 14.3)     |
| Shandong              | Zaozhuang    | 1.3 (-1.4, 4.0)   | 2.2 (-0.5, 4.9)   | 2.9 (0.0, 5.8)    | 1.6 (-0.7, 3.8)  | 3.4 (0.3, 6.5)    | 6.0 (1.4, 10.6)     |
| Shandong              | Dongying     | 1.8 (-1.2, 4.8)   | 2.9 (-0.4, 6.2)   | 3.8 (-0.3, 8.0)   | 2.1 (-0.7, 4.9)  | 4.3 (1.0, 7.6)    | 7.9 (2.6, 13.2)     |
| Shandong              | Yantai       | 1.7 (-1.7, 5.1)   | 2.8 (-1.0, 6.5)   | 3.6 (-0.6, 7.8)   | 2.0 (-1.0, 5.1)  | 4.1 (0.9, 7.2)    | 7.2 (2.4, 12.0)     |
| Shandong              | Weifang      | 1.5 (-1.2, 4.2)   | 2.5 (-0.6, 5.6)   | 3.5 (-0.1, 7.1)   | 1.9 (-0.6, 4.4)  | 3.8 (0.6, 6.9)    | 6.7 (1.9, 11.5)     |
| Shandong              | Jining       | 1.3 (-1.4, 4.0)   | 2.2 (-0.5, 4.9)   | 2.9 (0.0, 5.8)    | 1.6 (-0.7, 3.8)  | 3.4 (0.3, 6.5)    | 6.0 (1.4, 10.6)     |
| Shandong              | Tai'an       | 4.5 (-1.7, 10.6)  | 8.0 (0.9, 15.0)   | 10.8 (0.8, 20.7)  | 5.6 (0.5, 10.6)  | 12.1 (4.2, 19.9)  | 24.2 (11.7, 36.7)   |
| Shandong              | Weihai       | 1.7 (-1.7, 5.1)   | 2.8 (-1.0, 6.5)   | 3.6 (-0.6, 7.8)   | 2.0 (-1.0, 5.1)  | 4.1 (0.9, 7.2)    | 7.2 (2.4, 12.0)     |
| Shandong              | Rizhao       | 1.4 (-1.7, 4.6)   | 2.6 (-0.7, 6.0)   | 3.4 (-0.9, 7.7)   | 1.9 (-0.5, 4.2)  | 3.9 (0.8, 6.9)    | 7.2 (2.9, 11.5)     |
| Shandong              | Laiwu        | 1.6 (-1.5, 4.7)   | 2.7 (-0.6, 6.0)   | 3.6 (-0.3, 7.6)   | 2.2 (-0.5, 4.9)  | 4.3 (1.3, 7.3)    | 7.8 (2.9, 12.6)     |
| Shandong              | Linyi        | 1.6 (-1.7, 4.9)   | 2.8 (-0.6, 6.1)   | 3.7 (0.0, 7.4)    | 2.0 (-0.5, 4.5)  | 4.2 (0.7, 7.8)    | 7.9 (2.5, 13.3)     |
| Shandong              | Dezhou       | 1.4 (-1.3, 4.0)   | 2.4 (-0.5, 5.3)   | 3.3 (-0.3, 6.8)   | 1.9 (-0.7, 4.5)  | 3.9 (0.8, 7.0)    | 6.9 (1.5, 12.3)     |
| Shandong              | Liaocheng    | 1.4 (-1.3, 4.1)   | 2.4 (-0.4, 5.3)   | 3.2 (-0.1, 6.4)   | 1.7 (-0.7, 4.0)  | 3.6 (0.8, 6.5)    | 6.4 (1.6, 11.1)     |
| Shandong              | Binzhou      | 1.8 (-1.2, 4.8)   | 2.9 (-0.4, 6.2)   | 3.8 (-0.3, 8.0)   | 2.1 (-0.7, 4.9)  | 4.3 (1.0, 7.6)    | 7.9 (2.6, 13.2)     |
| Shandong              | Heze         | 1.4 (-1.3, 4.1)   | 2.4 (-0.4, 5.3)   | 3.2 (-0.1, 6.4)   | 1.7 (-0.7, 4.0)  | 3.6 (0.8, 6.5)    | 6.4 (1.6, 11.1)     |
| <b>Central region</b> |              |                   |                   |                   |                  |                   |                     |
| Henan                 | Zhengzhou    | -0.9 (-4.1, 2.3)  | -1.5 (-5.4, 2.5)  | -1.6 (-6.0, 2.7)  | -1.0 (-5.1, 3.1) | -2.3 (-7.3, 2.7)  | -6.0 (-14.4, 2.4)   |
| Henan                 | Kaifeng      | -0.9 (-4.4, 2.7)  | -1.3 (-5.2, 2.6)  | -1.7 (-6.5, 3.1)  | -0.5 (-4.1, 3.2) | -1.9 (-6.5, 2.7)  | -5.4 (-13.6, 2.9)   |
| Henan                 | Luoyang      | -0.3 (-3.5, 2.9)  | -0.1 (-3.5, 3.3)  | 0.0 (-3.7, 3.6)   | 0.2 (-3.3, 3.7)  | -0.1 (-4.7, 4.5)  | -1.9 (-8.4, 4.5)    |
| Henan                 | Pingdingshan | -1.2 (-4.1, 1.7)  | -2.0 (-5.7, 1.6)  | -2.6 (-7.2, 2.0)  | -1.2 (-4.8, 2.4) | -3.2 (-7.9, 1.5)  | -8.1 (-16.1, 0.0)   |
| Henan                 | Anyang       | -0.4 (-4.5, 3.7)  | -0.8 (-4.7, 3.1)  | -1.1 (-6.2, 3.9)  | -0.1 (-4.0, 3.8) | -1.0 (-5.8, 3.8)  | -4.2 (-12.5, 4.1)   |
| Henan                 | Hebi         | -0.4 (-4.5, 3.7)  | -0.8 (-4.7, 3.1)  | -1.1 (-6.2, 3.9)  | -0.1 (-4.0, 3.8) | -1.0 (-5.8, 3.8)  | -4.2 (-12.5, 4.1)   |
| Henan                 | Xinxiang     | -0.8 (-4.0, 2.4)  | -1.3 (-5.0, 2.5)  | -1.4 (-6.1, 3.2)  | -0.4 (-4.4, 3.6) | -1.4 (-6.1, 3.3)  | -4.5 (-12.2, 3.3)   |
| Henan                 | Jiaozuo      | -0.8 (-4.0, 2.4)  | -1.3 (-5.0, 2.5)  | -1.4 (-6.1, 3.2)  | -0.4 (-4.4, 3.6) | -1.4 (-6.1, 3.3)  | -4.5 (-12.2, 3.3)   |
| Henan                 | Puyang       | 0.1 (-3.4, 3.7)   | 0.0 (-4.5, 4.5)   | -0.1 (-5.0, 4.7)  | -0.2 (-3.9, 3.5) | -0.5 (-5.3, 4.4)  | -2.6 (-10.5, 5.3)   |
| Henan                 | Xuchang      | -1.0 (-3.8, 1.8)  | -2.0 (-6.0, 2.0)  | -2.5 (-7.1, 2.1)  | -1.2 (-4.9, 2.5) | -3.0 (-8.4, 2.5)  | -7.4 (-16.2, 1.5)   |
| Henan                 | Luohe        | -0.7 (-3.9, 2.5)  | -1.5 (-5.2, 2.2)  | -2.0 (-6.7, 2.7)  | -0.9 (-4.6, 2.9) | -2.5 (-7.3, 2.3)  | -6.9 (-15.4, 1.7)   |
| Henan                 | Sanmenxia    | -0.8 (-3.7, 2.1)  | -1.5 (-5.1, 2.1)  | -1.9 (-5.8, 1.9)  | -0.9 (-4.9, 3.0) | -2.5 (-7.6, 2.7)  | -6.8 (-15.2, 1.6)   |
| Henan                 | Nanyang      | -0.9 (-4.3, 2.4)  | -2.1 (-6.1, 2.0)  | -2.7 (-8.6, 3.2)  | -1.2 (-4.9, 2.4) | -3.2 (-8.0, 1.6)  | -8.1 (-16.1, -0.2)  |
| Henan                 | Shangqiu     | -0.8 (-4.0, 2.5)  | -1.4 (-5.3, 2.5)  | -1.8 (-6.5, 2.9)  | -0.7 (-4.5, 3.1) | -1.8 (-6.9, 3.2)  | -5.8 (-13.7, 2.2)   |
| Henan                 | Xinyang      | -1.6 (-5.1, 2.0)  | -3.0 (-8.0, 2.1)  | -3.8 (-9.7, 2.1)  | -1.6 (-5.8, 2.5) | -4.2 (-10.2, 1.8) | -10.6 (-20.9, -0.2) |
| Henan                 | Zhoukou      | -0.7 (-3.9, 2.5)  | -1.5 (-5.2, 2.2)  | -2.0 (-6.7, 2.7)  | -0.9 (-4.6, 2.9) | -2.5 (-7.3, 2.3)  | -6.9 (-15.4, 1.7)   |
| Henan                 | Zhumadian    | -1.5 (-5.6, 2.6)  | -2.6 (-7.6, 2.5)  | -3.2 (-9.2, 2.9)  | -1.3 (-5.7, 3.2) | -3.5 (-9.4, 2.4)  | -8.9 (-18.9, 1.1)   |
| Henan                 | Jiyuan       | -0.3 (-3.5, 2.9)  | -0.1 (-3.5, 3.3)  | 0.0 (-3.7, 3.6)   | 0.2 (-3.3, 3.7)  | -0.1 (-4.7, 4.5)  | -1.9 (-8.4, 4.5)    |
| Hubei                 | Wuhan        | -2.3 (-7.0, 2.4)  | -4.9 (-11.0, 1.3) | -7.0 (-15.1, 1.2) | -2.8 (-8.4, 2.8) | -7.3 (-17.0, 2.3) | -18.0 (-32.1, -4.0) |
| Hubei                 | Huangshi     | -2.7 (-7.5, 2.1)  | -6.2 (-12.5, 0.1) | -8.5 (-18.0, 0.9) | -4.1 (-9.7, 1.5) | -9.5 (-19.6, 0.5) | -22.0 (-37.1, -7.0) |

|              |               |                  |                    |                    |                  |                    |                     |
|--------------|---------------|------------------|--------------------|--------------------|------------------|--------------------|---------------------|
| Hubei        | Shiyan        | -1.1 (-4.4, 2.3) | -2.4 (-6.2, 1.4)   | -3.6 (-9.9, 2.7)   | -1.5 (-5.3, 2.4) | -3.9 (-8.9, 1.0)   | -10.7 (-19.3, -2.1) |
| Hubei        | Yichang       | -2.9 (-8.0, 2.3) | -5.7 (-11.6, 0.2)  | -8.1 (-17.6, 1.3)  | -3.9 (-8.8, 1.0) | -9.0 (-16.8, -1.2) | -21.2 (-33.8, -8.6) |
| Hubei        | Xiangyang     | -2.0 (-5.9, 1.9) | -3.9 (-9.0, 1.3)   | -5.6 (-14.0, 2.9)  | -2.5 (-7.2, 2.2) | -6.2 (-13.3, 1.0)  | -14.7 (-25.9, -3.5) |
| Hubei        | Ezhou         | -2.7 (-7.5, 2.1) | -6.2 (-12.5, 0.1)  | -8.5 (-18.0, 0.9)  | -4.1 (-9.7, 1.5) | -9.5 (-19.6, 0.5)  | -22.0 (-37.1, -7.0) |
| Hubei        | Jingmen       | -2.4 (-7.0, 2.2) | -4.7 (-10.3, 0.8)  | -6.7 (-15.3, 1.8)  | -3.0 (-7.8, 1.9) | -7.3 (-14.9, 0.2)  | -17.8 (-29.0, -6.5) |
| Hubei        | Xiaogan       | -2.4 (-7.5, 2.6) | -5.2 (-11.8, 1.4)  | -7.4 (-16.1, 1.2)  | -3.0 (-9.0, 2.9) | -7.8 (-18.1, 2.4)  | -19.3 (-34.3, -4.3) |
| Hubei        | Jingzhou      | -2.1 (-7.5, 3.2) | -4.6 (-10.3, 1.2)  | -6.8 (-14.5, 1.0)  | -2.8 (-6.7, 1.2) | -6.8 (-12.9, -0.8) | -17.8 (-27.6, -8.1) |
| Hubei        | Huanggang     | -2.7 (-7.5, 2.1) | -6.2 (-12.5, 0.1)  | -8.5 (-18.0, 0.9)  | -4.1 (-9.7, 1.5) | -9.5 (-19.6, 0.5)  | -22.0 (-37.1, -7.0) |
| Hubei        | Xianning      | -2.9 (-7.8, 1.9) | -6.2 (-12.7, 0.3)  | -8.6 (-18.0, 0.8)  | -3.6 (-9.5, 2.3) | -9.1 (-19.3, 1.1)  | -21.6 (-36.4, -6.9) |
| Hubei        | Suizhou       | -1.8 (-5.3, 1.8) | -3.7 (-8.3, 0.8)   | -5.2 (-12.8, 2.4)  | -2.4 (-7.1, 2.3) | -5.7 (-12.5, 1.2)  | -13.8 (-24.2, -3.4) |
| Hubei        | Enshi         | -2.6 (-7.0, 1.7) | -5.4 (-10.5, -0.2) | -7.6 (-14.0, -1.2) | -3.7 (-7.4, 0.0) | -8.0 (-14.7, -1.3) | -19.6 (-31.5, -7.7) |
| Hubei        | Xiantao       | -2.2 (-7.3, 3.0) | -4.4 (-10.3, 1.4)  | -6.8 (-14.2, 0.6)  | -2.8 (-6.9, 1.4) | -6.7 (-12.9, -0.6) | -17.4 (-26.8, -8.0) |
| Hubei        | Qianjiang     | -2.2 (-7.3, 3.0) | -4.4 (-10.3, 1.4)  | -6.8 (-14.2, 0.6)  | -2.8 (-6.9, 1.4) | -6.7 (-12.9, -0.6) | -17.4 (-26.8, -8.0) |
| Hubei        | Tianmen       | -2.2 (-7.4, 3.0) | -4.5 (-10.5, 1.5)  | -6.9 (-14.4, 0.6)  | -2.8 (-7.0, 1.4) | -6.8 (-13.1, -0.6) | -17.7 (-27.2, -8.2) |
| Hubei        | Shennongjia   | -1.3 (-5.3, 2.7) | -2.8 (-7.4, 1.7)   | -4.3 (-11.8, 3.1)  | -1.8 (-6.4, 2.9) | -4.7 (-10.6, 1.2)  | -12.7 (-23.0, -2.5) |
| Hunan        | Changsha      | 0.3 (-3.3, 3.8)  | 0.0 (-3.7, 3.7)    | -0.5 (-4.2, 3.2)   | 0.0 (-2.3, 2.3)  | -0.4 (-3.4, 2.6)   | -3.2 (-7.5, 1.2)    |
| Hunan        | Zhuzhou       | 2.3 (-0.9, 5.4)  | 4.0 (-0.3, 8.3)    | 5.2 (1.0, 9.5)     | 2.9 (-0.4, 6.1)  | 5.9 (1.6, 10.1)    | 9.5 (2.3, 16.7)     |
| Hunan        | Xiangtan      | 2.3 (-0.9, 5.4)  | 4.0 (-0.3, 8.3)    | 5.2 (1.0, 9.5)     | 2.9 (-0.4, 6.1)  | 5.9 (1.6, 10.1)    | 9.5 (2.3, 16.7)     |
| Hunan        | Hengyang      | -0.3 (-3.5, 2.8) | -0.9 (-4.7, 2.8)   | -1.5 (-5.2, 2.2)   | -0.5 (-3.3, 2.3) | -1.6 (-5.4, 2.2)   | -5.6 (-10.8, -0.4)  |
| Hunan        | Shaoyang      | 0.0 (-2.7, 2.7)  | -0.2 (-3.5, 3.1)   | -0.7 (-3.9, 2.5)   | -0.1 (-2.5, 2.2) | -0.6 (-4.0, 2.8)   | -3.2 (-7.7, 1.4)    |
| Hunan        | Yueyang       | -0.1 (-3.4, 3.2) | -0.4 (-3.4, 2.7)   | -1.0 (-4.3, 2.4)   | -0.2 (-2.1, 1.7) | -0.7 (-3.2, 1.9)   | -3.2 (-7.0, 0.5)    |
| Hunan        | Changde       | -0.1 (-3.3, 3.2) | -0.3 (-3.5, 2.9)   | -0.8 (-4.2, 2.5)   | -0.1 (-2.2, 1.9) | -0.8 (-3.7, 2.1)   | -3.3 (-7.8, 1.2)    |
| Hunan        | Zhangjiajie   | -0.2 (-2.9, 2.5) | -0.3 (-3.0, 2.5)   | -0.8 (-3.6, 2.1)   | -0.2 (-2.4, 2.1) | -0.6 (-3.8, 2.6)   | -3.1 (-7.5, 1.2)    |
| Hunan        | Yiyang        | 0.0 (-3.3, 3.3)  | -0.2 (-3.6, 3.2)   | -0.8 (-4.2, 2.7)   | -0.1 (-2.4, 2.1) | -0.7 (-3.6, 2.3)   | -3.3 (-7.8, 1.2)    |
| Hunan        | Chenzhou      | -0.5 (-3.8, 2.7) | -1.2 (-5.0, 2.6)   | -2.1 (-6.2, 2.0)   | -0.9 (-3.6, 1.9) | -2.0 (-6.3, 2.3)   | -6.7 (-13.1, -0.3)  |
| Hunan        | Yongzhou      | -0.4 (-3.0, 2.2) | -0.9 (-3.9, 2.2)   | -1.4 (-4.7, 1.9)   | -0.6 (-3.1, 2.0) | -1.5 (-5.1, 2.1)   | -5.0 (-10.3, 0.2)   |
| Hunan        | Huaihua       | 0.1 (-2.6, 2.7)  | 0.1 (-3.5, 3.6)    | -0.4 (-3.0, 2.2)   | -0.1 (-2.4, 2.3) | -0.2 (-3.9, 3.4)   | -2.4 (-7.9, 3.0)    |
| Hunan        | Loudi         | 0.0 (-3.2, 3.1)  | -0.2 (-4.1, 3.6)   | -0.8 (-4.4, 2.7)   | -0.2 (-2.6, 2.2) | -0.6 (-4.2, 3.0)   | -3.5 (-8.3, 1.3)    |
| Hunan        | Xiangxi       | 0.0 (-2.4, 2.5)  | -0.3 (-3.1, 2.5)   | -0.6 (-3.7, 2.4)   | -0.2 (-2.6, 2.1) | -0.6 (-4.0, 2.8)   | -3.3 (-8.2, 1.6)    |
| <b>South</b> |               |                  |                    |                    |                  |                    |                     |
| Guangdong    | Guangzhou     | 3.7 (-0.6, 8.0)  | 6.1 (0.5, 11.6)    | 8.5 (1.7, 15.2)    | 4.1 (0.1, 8.1)   | 8.9 (1.8, 16.1)    | 14.5 (4.1, 24.9)    |
| Guangdong    | Shaoguan      | 3.7 (-0.5, 7.9)  | 6.2 (0.2, 12.2)    | 8.3 (1.1, 15.6)    | 4.1 (0.0, 8.2)   | 8.8 (0.9, 16.8)    | 14.9 (2.6, 27.2)    |
| Guangdong    | Shenzhen      | 3.7 (-0.1, 7.6)  | 6.1 (0.8, 11.4)    | 8.2 (1.8, 14.5)    | 4.3 (0.3, 8.3)   | 8.9 (1.9, 15.9)    | 12.9 (3.1, 22.6)    |
| Guangdong    | Zhuhai        | 3.7 (-0.1, 7.6)  | 6.1 (0.8, 11.4)    | 8.2 (1.8, 14.5)    | 4.3 (0.3, 8.3)   | 8.9 (1.9, 15.9)    | 12.9 (3.1, 22.6)    |
| Guangdong    | Shantou       | 4.9 (0.5, 9.2)   | 7.6 (1.7, 13.5)    | 10.4 (2.6, 18.1)   | 5.0 (0.2, 9.8)   | 10.7 (2.8, 18.6)   | 16.9 (5.3, 28.4)    |
| Guangdong    | Foshan        | 3.7 (-0.6, 8.0)  | 6.1 (0.5, 11.6)    | 8.5 (1.7, 15.2)    | 4.1 (0.1, 8.1)   | 8.9 (1.8, 16.1)    | 14.5 (4.1, 24.9)    |
| Guangdong    | Jiangmen      | 4.3 (-0.8, 9.4)  | 7.4 (-1.0, 15.8)   | 10.3 (0.6, 20.1)   | 5.1 (-0.2, 10.4) | 11.0 (2.0, 20.0)   | 15.9 (6.7, 25.1)    |
| Guangdong    | Zhanjiang     | 3.5 (-1.7, 8.7)  | 5.8 (-1.7, 13.3)   | 7.7 (-0.6, 16.0)   | 3.5 (-1.1, 8.1)  | 8.0 (0.3, 15.7)    | 11.1 (2.8, 19.4)    |
| Guangdong    | Maoming       | 3.7 (-0.7, 8.0)  | 6.3 (-0.6, 13.2)   | 8.5 (0.4, 16.7)    | 3.9 (-0.7, 8.5)  | 8.8 (1.0, 16.6)    | 13.4 (4.5, 22.3)    |
| Guangdong    | Zhaoqing      | 3.5 (-0.7, 7.6)  | 5.9 (0.0, 11.7)    | 7.9 (1.2, 14.6)    | 4.1 (0.4, 7.7)   | 8.6 (1.5, 15.8)    | 14.0 (3.9, 24.2)    |
| Guangdong    | Huizhou       | 3.9 (-0.2, 8.0)  | 6.5 (0.9, 12.1)    | 8.9 (2.0, 15.7)    | 4.4 (0.1, 8.8)   | 9.5 (1.6, 17.4)    | 14.7 (3.9, 25.4)    |
| Guangdong    | Meizhou       | 4.0 (0.3, 7.6)   | 6.4 (0.9, 12.0)    | 8.9 (2.1, 15.6)    | 4.2 (-0.5, 9.0)  | 9.4 (0.9, 18.0)    | 14.6 (2.5, 26.8)    |
| Guangdong    | Shanwei       | 4.2 (-0.1, 8.4)  | 6.7 (1.2, 12.2)    | 9.2 (2.3, 16.1)    | 4.7 (0.3, 9.1)   | 9.8 (2.6, 16.9)    | 15.4 (5.2, 25.7)    |
| Guangdong    | Heyuan        | 4.1 (0.1, 8.1)   | 6.7 (1.3, 12.2)    | 9.1 (2.1, 16.0)    | 4.5 (-0.1, 9.0)  | 9.5 (1.5, 17.6)    | 15.0 (3.4, 26.5)    |
| Guangdong    | Yangjiang     | 4.2 (-0.8, 9.3)  | 7.4 (-1.2, 15.9)   | 10.0 (0.3, 19.6)   | 4.8 (-0.2, 9.8)  | 10.6 (1.8, 19.4)   | 15.4 (6.9, 24.0)    |
| Guangdong    | Qingyuan      | 4.2 (0.0, 8.4)   | 7.1 (1.3, 12.8)    | 9.8 (2.7, 16.8)    | 4.6 (0.4, 8.8)   | 10.3 (2.5, 18.2)   | 17.5 (5.7, 29.3)    |
| Guangdong    | Dongguan      | 4.1 (-0.3, 8.5)  | 6.8 (1.0, 12.6)    | 9.3 (2.3, 16.2)    | 4.5 (0.5, 8.6)   | 9.9 (2.4, 17.5)    | 16.2 (5.8, 26.6)    |
| Guangdong    | Zhongshan     | 4.3 (-0.8, 9.4)  | 7.4 (-1.0, 15.8)   | 10.3 (0.6, 20.1)   | 5.1 (-0.2, 10.4) | 11.0 (2.0, 20.0)   | 15.9 (6.7, 25.1)    |
| Guangdong    | Chaozhou      | 4.9 (0.5, 9.2)   | 7.6 (1.7, 13.5)    | 10.4 (2.6, 18.1)   | 5.0 (0.2, 9.8)   | 10.7 (2.8, 18.6)   | 16.9 (5.3, 28.4)    |
| Guangdong    | Jieyang       | 4.9 (0.5, 9.2)   | 7.6 (1.7, 13.5)    | 10.4 (2.6, 18.1)   | 5.0 (0.2, 9.8)   | 10.7 (2.8, 18.6)   | 16.9 (5.3, 28.4)    |
| Guangdong    | Yunfu         | 3.5 (-0.7, 7.6)  | 5.9 (0.0, 11.7)    | 7.9 (1.2, 14.6)    | 4.1 (0.4, 7.7)   | 8.6 (1.5, 15.8)    | 14.0 (3.9, 24.2)    |
| Guangxi      | Nanning       | 1.5 (-2.1, 5.2)  | 2.8 (-2.5, 8.2)    | 3.5 (-1.1, 8.2)    | 1.6 (-1.5, 4.7)  | 3.4 (-2.4, 9.1)    | 3.6 (-5.7, 12.8)    |
| Guangxi      | Liuzhou       | 1.4 (-1.2, 3.9)  | 2.3 (-1.5, 6.2)    | 3.2 (-1.3, 7.7)    | 1.4 (-2.0, 4.8)  | 3.0 (-3.0, 9.1)    | 2.8 (-8.2, 13.7)    |
| Guangxi      | Guilin        | 1.8 (-0.9, 4.4)  | 3.2 (-2.0, 8.4)    | 4.0 (-0.1, 8.1)    | 2.3 (-0.7, 5.4)  | 4.4 (-1.5, 10.4)   | 5.5 (-5.4, 16.3)    |
| Guangxi      | Wuzhou        | 2.1 (-1.7, 5.9)  | 3.3 (-2.5, 9.2)    | 4.3 (-1.0, 9.5)    | 2.4 (-1.2, 5.9)  | 4.7 (-2.3, 11.7)   | 5.2 (-5.7, 16.0)    |
| Guangxi      | Beihai        | 1.7 (-2.5, 6.0)  | 3.0 (-3.1, 9.1)    | 3.6 (-2.3, 9.5)    | 1.9 (-1.8, 5.6)  | 3.8 (-1.8, 9.4)    | 1.9 (-7.5, 11.3)    |
| Guangxi      | Fangchenggang | 1.8 (-2.0, 5.6)  | 3.4 (-2.2, 8.9)    | 4.4 (-1.1, 9.9)    | 1.8 (-1.4, 5.0)  | 4.4 (-0.8, 9.5)    | 4.5 (-5.7, 14.7)    |
| Guangxi      | Qinzhou       | 2.1 (-2.2, 6.3)  | 3.5 (-2.7, 9.7)    | 4.6 (-1.3, 10.5)   | 2.2 (-1.5, 6.0)  | 4.6 (-1.6, 10.8)   | 4.2 (-4.3, 12.6)    |
| Guangxi      | Guigang       | 1.6 (-1.3, 4.5)  | 2.6 (-2.3, 7.6)    | 3.7 (-1.2, 8.6)    | 1.6 (-1.3, 4.6)  | 3.7 (-2.3, 9.7)    | 4.4 (-6.5, 15.3)    |
| Guangxi      | Yulin         | 2.0 (-1.3, 5.3)  | 3.4 (-1.5, 8.2)    | 4.6 (-0.6, 9.7)    | 2.1 (-1.3, 5.6)  | 4.7 (-1.2, 10.6)   | 5.9 (-3.8, 15.7)    |

|                  |             |                    |                     |                     |                    |                     |                      |
|------------------|-------------|--------------------|---------------------|---------------------|--------------------|---------------------|----------------------|
| Guangxi          | Baise       | 0.9 (-2.6, 4.4)    | 1.7 (-3.3, 6.7)     | 1.9 (-2.8, 6.5)     | 1.0 (-1.9, 3.9)    | 2.0 (-3.3, 7.2)     | 0.3 (-9.5, 10.0)     |
| Guangxi          | Hezhou      | 1.9 (-1.8, 5.5)    | 3.1 (-2.5, 8.7)     | 4.0 (-1.1, 9.2)     | 2.2 (-1.4, 5.9)    | 4.3 (-2.6, 11.3)    | 5.1 (-6.1, 16.2)     |
| Guangxi          | Hechi       | 1.8 (-1.8, 5.4)    | 3.0 (-2.0, 8.0)     | 3.6 (-1.2, 8.4)     | 1.8 (-1.3, 4.9)    | 3.3 (-2.4, 9.0)     | 3.4 (-7.0, 13.9)     |
| Guangxi          | Laibin      | 1.8 (-1.1, 4.7)    | 3.2 (-1.6, 7.9)     | 4.1 (-0.7, 9.0)     | 1.9 (-1.5, 5.3)    | 4.1 (-1.9, 10.1)    | 4.9 (-6.6, 16.3)     |
| Guangxi          | Chongzuo    | 1.7 (-1.6, 5.0)    | 3.1 (-2.4, 8.6)     | 3.8 (-1.5, 9.1)     | 1.5 (-1.1, 4.1)    | 3.5 (-1.5, 8.4)     | 3.8 (-4.1, 11.7)     |
| Hainan           | Haikou      | -0.7 (-4.6, 3.1)   | -3.1 (-10.5, 4.2)   | -5.1 (-16.0, 5.8)   | -2.3 (-5.8, 1.3)   | -6.1 (-14.4, 2.2)   | -20.1 (-38.9, -1.3)  |
| Hainan           | Sanya       | -2.2 (-5.9, 1.5)   | -5.1 (-11.5, 1.4)   | -7.9 (-18.7, 2.8)   | -2.9 (-6.5, 0.6)   | -8.4 (-18.2, 1.3)   | -24.7 (-50.1, 0.6)   |
| Hainan           | Wuzhishan   | 1.0 (-2.7, 4.7)    | 0.4 (-4.7, 5.5)     | -0.5 (-8.5, 7.5)    | 0.5 (-2.9, 4.0)    | -0.9 (-7.5, 5.8)    | -12.6 (-34.8, 9.6)   |
| Hainan           | Qionghai    | -1.2 (-4.8, 2.4)   | -3.6 (-9.3, 2.1)    | -5.7 (-15.5, 4.0)   | -2.2 (-5.6, 1.3)   | -6.4 (-14.2, 1.4)   | -21.5 (-43.8, 0.8)   |
| Hainan           | Danzhou     | -0.9 (-4.8, 3.1)   | -2.9 (-9.1, 3.3)    | -4.8 (-15.3, 5.8)   | -1.6 (-4.6, 1.5)   | -5.1 (-13.7, 3.5)   | -18.6 (-43.2, 6.0)   |
| Hainan           | Wenchang    | -1.2 (-4.8, 2.4)   | -3.6 (-9.3, 2.1)    | -5.7 (-15.5, 4.0)   | -2.2 (-5.6, 1.3)   | -6.4 (-14.2, 1.4)   | -21.5 (-43.8, 0.8)   |
| Hainan           | Wanning     | -1.2 (-4.9, 2.5)   | -3.7 (-9.5, 2.1)    | -5.8 (-15.8, 4.1)   | -2.2 (-5.7, 1.3)   | -6.5 (-14.5, 1.5)   | -21.9 (-44.6, 0.8)   |
| Hainan           | Dongfang    | -1.1 (-5.6, 3.3)   | -3.7 (-10.7, 3.2)   | -5.9 (-17.6, 5.8)   | -2.2 (-5.1, 0.6)   | -6.7 (-16.3, 2.9)   | -21.8 (-49.5, 6.0)   |
| Hainan           | Ding'an     | -0.8 (-4.7, 3.2)   | -3.2 (-10.7, 4.3)   | -5.2 (-16.3, 5.9)   | -2.3 (-6.0, 1.3)   | -6.3 (-14.7, 2.2)   | -20.5 (-39.7, -1.3)  |
| Hainan           | Tunchang    | -1.3 (-5.3, 2.6)   | -3.9 (-10.2, 2.3)   | -6.3 (-16.9, 4.4)   | -2.4 (-6.2, 1.4)   | -7.0 (-15.6, 1.6)   | -23.6 (-48.0, 0.8)   |
| Hainan           | Chengmai    | -0.7 (-4.6, 3.1)   | -3.1 (-10.5, 4.2)   | -5.1 (-16.0, 5.8)   | -2.3 (-5.8, 1.3)   | -6.1 (-14.4, 2.2)   | -20.1 (-38.9, -1.3)  |
| Hainan           | Lingao      | -0.9 (-5.1, 3.2)   | -3.0 (-9.6, 3.5)    | -5.0 (-16.1, 6.1)   | -1.7 (-4.9, 1.5)   | -5.4 (-14.5, 3.7)   | -19.6 (-45.6, 6.3)   |
| Hainan           | Baisha      | -0.9 (-4.9, 3.1)   | -2.9 (-9.3, 3.4)    | -4.9 (-15.6, 5.9)   | -1.6 (-4.7, 1.5)   | -5.2 (-14.0, 3.6)   | -19.0 (-44.1, 6.1)   |
| Hainan           | Changjiang  | -1.1 (-5.6, 3.3)   | -3.7 (-10.7, 3.2)   | -5.9 (-17.6, 5.8)   | -2.2 (-5.1, 0.6)   | -6.7 (-16.3, 2.9)   | -21.8 (-49.5, 6.0)   |
| Hainan           | Ledong      | -2.2 (-5.9, 1.5)   | -5.1 (-11.5, 1.4)   | -7.9 (-18.7, 2.8)   | -2.9 (-6.5, 0.6)   | -8.4 (-18.2, 1.3)   | -24.7 (-50.1, 0.6)   |
| Hainan           | Lingshui    | -1.6 (-5.5, 2.2)   | -3.9 (-10.3, 2.4)   | -6.6 (-16.2, 2.9)   | -2.1 (-5.8, 1.5)   | -6.8 (-15.7, 2.1)   | -24.8 (-50.3, 0.7)   |
| Hainan           | Baoting     | -1.7 (-5.8, 2.4)   | -4.2 (-10.9, 2.5)   | -7.0 (-17.2, 3.1)   | -2.3 (-6.2, 1.6)   | -7.2 (-16.6, 2.2)   | -26.2 (-53.2, 0.8)   |
| Hainan           | Qiongzong   | 1.0 (-2.7, 4.7)    | 0.4 (-4.7, 5.5)     | -0.5 (-8.5, 7.5)    | 0.5 (-2.9, 4.0)    | -0.9 (-7.5, 5.8)    | -12.6 (-34.8, 9.6)   |
| <b>Southwest</b> |             |                    |                     |                     |                    |                     |                      |
| Chongqing        | Chongqing   | 0.3 (-2.6, 3.1)    | 0.4 (-2.6, 3.3)     | 0.1 (-2.9, 3.2)     | 0.3 (-1.5, 2.2)    | 0.4 (-2.4, 3.2)     | -1.5 (-5.8, 2.7)     |
| Sichuan          | Chengdu     | 0.0 (-2.6, 2.7)    | 0.5 (-2.4, 3.3)     | -0.1 (-3.4, 3.3)    | 0.3 (-2.3, 2.8)    | 0.3 (-2.9, 3.4)     | -2.3 (-8.5, 3.9)     |
| Sichuan          | Zigong      | -1.0 (-5.4, 3.3)   | -1.9 (-7.0, 3.1)    | -3.5 (-9.3, 2.3)    | -1.4 (-4.8, 2.1)   | -3.3 (-8.8, 2.1)    | -10.9 (-21.4, -0.4)  |
| Sichuan          | Panzhihua   | -6.3 (-12.4, -0.3) | -11.2 (-18.1, -4.4) | -16.9 (-27.8, -6.0) | -7.8 (-12.5, -3.0) | -17.9 (-27.3, -8.5) | -42.4 (-63.2, -21.5) |
| Sichuan          | Luzhou      | -1.7 (-6.6, 3.3)   | -3.5 (-9.4, 2.4)    | -5.1 (-11.4, 1.3)   | -2.4 (-7.0, 2.3)   | -5.4 (-11.7, 0.8)   | -15.2 (-28.1, -2.2)  |
| Sichuan          | Deyang      | -0.6 (-3.9, 2.8)   | -0.6 (-4.4, 3.2)    | -1.4 (-5.8, 2.9)    | -0.3 (-2.8, 2.2)   | -1.2 (-4.7, 2.3)    | -5.3 (-12.0, 1.3)    |
| Sichuan          | Mianyang    | -0.6 (-3.9, 2.8)   | -0.6 (-4.4, 3.2)    | -1.4 (-5.8, 2.9)    | -0.3 (-2.8, 2.2)   | -1.2 (-4.7, 2.3)    | -5.3 (-12.0, 1.3)    |
| Sichuan          | Guangyuan   | -0.1 (-3.2, 2.9)   | -0.4 (-3.7, 2.9)    | -0.9 (-5.1, 3.3)    | -0.3 (-3.4, 2.8)   | -1.0 (-5.4, 3.4)    | -5.4 (-12.7, 2.0)    |
| Sichuan          | Suining     | -0.6 (-4.4, 3.1)   | -1.3 (-5.9, 3.3)    | -2.6 (-8.7, 3.4)    | -1.1 (-4.4, 2.1)   | -2.7 (-7.6, 2.1)    | -8.6 (-17.1, -0.2)   |
| Sichuan          | Neijiang    | -0.9 (-4.6, 2.9)   | -1.7 (-6.0, 2.7)    | -3.0 (-8.0, 2.0)    | -1.2 (-4.1, 1.8)   | -2.9 (-7.5, 1.8)    | -9.4 (-18.4, -0.4)   |
| Sichuan          | Leshan      | -0.7 (-3.5, 2.1)   | -1.1 (-4.4, 2.1)    | -2.2 (-6.3, 1.8)    | -0.9 (-4.2, 2.3)   | -2.1 (-6.5, 2.3)    | -7.9 (-16.6, 0.8)    |
| Sichuan          | Nanchong    | -1.0 (-5.2, 3.3)   | -1.9 (-7.1, 3.3)    | -3.3 (-9.4, 2.9)    | -1.4 (-4.9, 2.0)   | -3.5 (-8.4, 1.4)    | -9.9 (-18.4, -1.4)   |
| Sichuan          | Meishan     | -0.7 (-3.6, 2.1)   | -1.2 (-4.5, 2.2)    | -2.3 (-6.4, 1.8)    | -1.0 (-4.3, 2.3)   | -2.2 (-6.7, 2.4)    | -8.2 (-17.1, 0.8)    |
| Sichuan          | Yibin       | -1.2 (-6.2, 3.9)   | -2.2 (-8.0, 3.6)    | -4.0 (-10.7, 2.7)   | -1.6 (-5.5, 2.4)   | -3.9 (-10.1, 2.4)   | -12.6 (-24.7, -0.5)  |
| Sichuan          | Guang'an    | -1.0 (-5.2, 3.3)   | -1.9 (-7.1, 3.3)    | -3.3 (-9.4, 2.9)    | -1.4 (-4.9, 2.0)   | -3.5 (-8.4, 1.4)    | -9.9 (-18.4, -1.4)   |
| Sichuan          | Dazhou      | -0.9 (-4.5, 2.6)   | -1.7 (-6.4, 2.9)    | -3.2 (-8.7, 2.3)    | -1.4 (-4.9, 2.1)   | -3.4 (-8.3, 1.5)    | -10.3 (-18.7, -1.9)  |
| Sichuan          | Ya'an       | -0.2 (-3.2, 2.7)   | -0.4 (-3.4, 2.7)    | -1.1 (-4.7, 2.5)    | -0.4 (-3.2, 2.3)   | -0.9 (-4.3, 2.5)    | -4.9 (-11.6, 1.8)    |
| Sichuan          | Bazhong     | -0.7 (-3.7, 2.4)   | -1.3 (-5.2, 2.6)    | -2.2 (-6.9, 2.4)    | -1.0 (-3.8, 1.8)   | -2.4 (-6.7, 1.9)    | -7.8 (-15.4, -0.2)   |
| Sichuan          | Ziyang      | -0.7 (-4.7, 3.4)   | -1.4 (-6.3, 3.5)    | -2.8 (-9.3, 3.7)    | -1.2 (-4.7, 2.3)   | -2.9 (-8.1, 2.3)    | -9.3 (-18.3, -0.2)   |
| Sichuan          | Aba         | 2.5 (-0.6, 5.5)    | 3.9 (0.4, 7.5)      | 4.9 (1.0, 8.8)      | 3.1 (0.2, 6.0)     | 5.8 (2.2, 9.4)      | 9.3 (3.8, 14.9)      |
| Sichuan          | Garze       | 4.3 (0.1, 8.6)     | 7.3 (2.2, 12.4)     | 9.6 (3.0, 16.2)     | 5.3 (1.4, 9.3)     | 10.8 (5.6, 16.1)    | 20.5 (12.9, 28.1)    |
| Sichuan          | Liangshan   | -1.4 (-3.6, 0.8)   | -2.6 (-5.0, -0.2)   | -4.1 (-7.3, -0.8)   | -1.6 (-3.6, 0.4)   | -4.0 (-7.1, -0.9)   | -13.0 (-21.5, -4.4)  |
| Guizhou          | Guiyang     | -1.3 (-5.2, 2.6)   | -3.3 (-7.5, 1.0)    | -5.1 (-10.1, 0.0)   | -2.2 (-5.5, 1.1)   | -5.4 (-11.2, 0.4)   | -14.3 (-25.7, -3.0)  |
| Guizhou          | Liupanshui  | 0.5 (-2.1, 3.2)    | 0.7 (-2.5, 3.8)     | 0.6 (-3.1, 4.3)     | 0.4 (-1.6, 2.5)    | 0.9 (-1.6, 3.4)     | -1.8 (-6.9, 3.3)     |
| Guizhou          | Zunyi       | -1.6 (-6.4, 3.3)   | -3.8 (-9.2, 1.6)    | -5.8 (-12.0, 0.3)   | -2.4 (-6.7, 1.8)   | -5.9 (-12.3, 0.6)   | -15.7 (-28.9, -2.4)  |
| Guizhou          | Anshun      | -1.0 (-3.6, 1.6)   | -2.1 (-5.7, 1.4)    | -3.4 (-7.6, 0.8)    | -1.5 (-4.7, 1.7)   | -3.5 (-8.4, 1.3)    | -10.5 (-20.3, -0.7)  |
| Guizhou          | Bijie       | -0.5 (-4.1, 3.0)   | -1.1 (-5.4, 3.2)    | -2.0 (-5.9, 1.9)    | -0.7 (-3.8, 2.4)   | -2.1 (-6.2, 2.1)    | -7.5 (-15.9, 0.9)    |
| Guizhou          | Tongren     | -2.7 (-9.5, 4.2)   | -6.3 (-13.8, 1.2)   | -9.5 (-18.6, -0.3)  | -4.2 (-9.6, 1.2)   | -9.9 (-18.7, -1.0)  | -24.1 (-38.3, -9.9)  |
| Guizhou          | Qianxinan   | -3.0 (-7.1, 1.1)   | -5.3 (-10.7, 0.0)   | -7.9 (-14.6, -1.2)  | -3.7 (-8.2, 0.8)   | -8.2 (-15.6, -0.8)  | -22.1 (-39.5, -4.7)  |
| Guizhou          | Qiandongnan | -2.1 (-6.2, 1.9)   | -4.2 (-8.1, -0.2)   | -6.5 (-11.6, -1.4)  | -2.7 (-6.3, 0.8)   | -6.5 (-12.8, -0.2)  | -16.3 (-27.5, -5.1)  |
| Guizhou          | Qiannan     | -1.4 (-4.7, 1.9)   | -2.9 (-6.7, 0.9)    | -4.4 (-8.9, 0.1)    | -1.9 (-5.1, 1.4)   | -4.6 (-9.8, 0.7)    | -12.5 (-22.5, -2.4)  |
| Yunnan           | Kunming     | 4.0 (-0.1, 8.1)    | 6.6 (1.2, 12.0)     | 9.1 (2.3, 15.8)     | 4.6 (0.7, 8.6)     | 9.6 (4.1, 15.1)     | 17.2 (8.0, 26.4)     |
| Yunnan           | Qujing      | 2.8 (-1.4, 7.1)    | 4.9 (-0.6, 10.3)    | 6.5 (-0.1, 13.1)    | 3.1 (0.2, 6.0)     | 6.6 (1.8, 11.5)     | 12.1 (4.6, 19.5)     |
| Yunnan           | Yuxi        | 2.9 (-1.0, 6.7)    | 4.8 (-0.1, 9.8)     | 6.5 (0.2, 12.8)     | 3.3 (-0.3, 6.8)    | 7.0 (2.3, 11.6)     | 11.9 (4.8, 19.0)     |
| Yunnan           | Baoshan     | 3.7 (-0.8, 8.1)    | 6.2 (0.1, 12.3)     | 8.5 (0.6, 16.4)     | 4.5 (0.4, 8.7)     | 9.3 (3.2, 15.4)     | 17.2 (6.1, 28.3)     |
| Yunnan           | Zhaotong    | 4.5 (-0.8, 9.7)    | 7.7 (1.8, 13.5)     | 10.4 (2.7, 18.1)    | 5.2 (1.5, 8.9)     | 11.1 (4.5, 17.6)    | 21.1 (9.5, 32.8)     |

|                  |               |                    |                    |                    |                    |                    |                    |
|------------------|---------------|--------------------|--------------------|--------------------|--------------------|--------------------|--------------------|
| Yunnan           | Lijiang       | 5.0 (0.9, 9.1)     | 8.3 (2.9, 13.6)    | 11.9 (4.0, 19.8)   | 6.1 (3.0, 9.2)     | 12.9 (7.3, 18.4)   | 25.1 (14.8, 35.4)  |
| Yunnan           | Pu'er         | 1.6 (-2.1, 5.2)    | 2.7 (-2.1, 7.5)    | 3.7 (-1.6, 8.9)    | 2.1 (-1.3, 5.5)    | 4.2 (0.4, 8.0)     | 5.8 (1.5, 10.1)    |
| Yunnan           | Lincang       | 2.0 (-1.2, 5.3)    | 3.3 (-1.0, 7.6)    | 4.5 (-0.5, 9.5)    | 2.4 (-0.9, 5.8)    | 5.0 (0.9, 9.1)     | 8.2 (2.1, 14.3)    |
| Yunnan           | Chuxiong      | 3.4 (-0.5, 7.3)    | 5.5 (0.1, 11.0)    | 7.6 (0.6, 14.5)    | 4.0 (-1.1, 9.2)    | 8.3 (2.0, 14.6)    | 14.5 (4.4, 24.6)   |
| Yunnan           | Honghe        | 1.2 (-1.9, 4.4)    | 2.1 (-2.2, 6.4)    | 2.6 (-1.7, 6.9)    | 1.3 (-1.2, 3.9)    | 3.0 (-0.4, 6.4)    | 3.6 (-0.5, 7.8)    |
| Yunnan           | Wenshan       | 2.8 (-1.5, 7.0)    | 4.8 (-1.2, 10.8)   | 6.3 (-0.4, 13.1)   | 3.0 (-0.2, 6.3)    | 6.5 (1.5, 11.6)    | 11.4 (4.4, 18.5)   |
| Yunnan           | Xishuangbanna | -1.3 (-3.0, 0.5)   | -2.1 (-4.5, 0.3)   | -3.1 (-6.5, 0.4)   | -1.3 (-3.2, 0.7)   | -3.1 (-6.4, 0.2)   | -9.1 (-16.4, -1.9) |
| Yunnan           | Dali          | 3.5 (0.3, 6.8)     | 6.0 (1.1, 11.0)    | 8.2 (1.6, 14.8)    | 4.2 (1.3, 7.1)     | 8.8 (3.9, 13.8)    | 16.8 (7.6, 26.0)   |
| Yunnan           | Dehong        | 4.1 (-0.2, 8.4)    | 7.1 (1.1, 13.1)    | 10.2 (1.6, 18.9)   | 5.2 (1.2, 9.2)     | 11.1 (4.3, 17.9)   | 21.1 (8.6, 33.6)   |
| Yunnan           | Nujiang       | 3.7 (-0.8, 8.3)    | 6.3 (0.2, 12.5)    | 8.7 (0.6, 16.7)    | 4.6 (0.4, 8.8)     | 9.4 (3.2, 15.7)    | 17.5 (6.2, 28.8)   |
| Yunnan           | Deqen         | 10.1 (3.1, 17.1)   | 17.7 (6.4, 28.9)   | 26.1 (8.3, 43.8)   | 12.9 (6.1, 19.6)   | 28.8 (15.5, 42.0)  | 63.4 (36.3, 90.6)  |
| <b>Qingzang</b>  |               |                    |                    |                    |                    |                    |                    |
| Tibet            | Lhasa         | 0.9 (-3.0, 4.8)    | 1.2 (-3.3, 5.7)    | 1.7 (-3.3, 6.6)    | 1.5 (-4.2, 7.3)    | 2.8 (-4.2, 9.8)    | 2.4 (-9.1, 13.8)   |
| Tibet            | Rikaze        | 1.3 (-2.7, 5.4)    | 1.8 (-3.5, 7.1)    | 2.5 (-3.8, 8.9)    | 1.7 (-4.1, 7.5)    | 3.3 (-4.0, 10.5)   | 3.9 (-9.0, 16.8)   |
| Tibet            | Qamdo         | -2.8 (-20.0, 14.5) | -3.4 (-26.2, 19.5) | -2.4 (-26.5, 21.6) | -2.3 (-19.1, 14.4) | -6.1 (-23.8, 11.7) | -2.9 (-31.5, 25.6) |
| Tibet            | Shannan       | 0.3 (-3.2, 3.7)    | 0.0 (-4.4, 4.4)    | -0.2 (-4.8, 4.5)   | 0.9 (-4.0, 5.9)    | 0.6 (-5.5, 6.7)    | -2.1 (-12.7, 8.6)  |
| Tibet            | Nagqu         | 7.3 (-2.1, 16.7)   | 13.1 (2.4, 23.9)   | 17.5 (3.7, 31.4)   | 8.4 (1.4, 15.3)    | 19.2 (4.4, 34.1)   | 39.8 (12.9, 66.7)  |
| Tibet            | Ngari         | -0.4 (-6.0, 5.3)   | -0.1 (-6.1, 5.9)   | -0.3 (-8.2, 7.6)   | 0.4 (-5.7, 6.5)    | -0.3 (-8.3, 7.8)   | 0.0 (-8.7, 8.7)    |
| Tibet            | Nyingchi      | 0.3 (-3.0, 3.6)    | 0.5 (-3.4, 4.4)    | 0.4 (-4.0, 4.8)    | 0.9 (-3.5, 5.2)    | 1.3 (-3.9, 6.5)    | -1.1 (-8.8, 6.7)   |
| Qinghai          | Xining        | 2.0 (-2.6, 6.6)    | 3.6 (-1.2, 8.5)    | 4.8 (-0.1, 9.6)    | 3.0 (-2.0, 7.9)    | 6.0 (-0.4, 12.3)   | 9.6 (1.0, 18.2)    |
| Qinghai          | Haidong       | 2.0 (-2.6, 6.6)    | 3.6 (-1.2, 8.5)    | 4.8 (-0.1, 9.6)    | 3.0 (-2.0, 7.9)    | 6.0 (-0.4, 12.3)   | 9.6 (1.0, 18.2)    |
| Qinghai          | Haibei        | 6.0 (0.8, 11.1)    | 10.0 (2.4, 17.5)   | 13.6 (4.0, 23.2)   | 7.4 (1.5, 13.2)    | 15.1 (5.6, 24.5)   | 28.9 (15.1, 42.6)  |
| Qinghai          | Huangnan      | 6.0 (-8.6, 20.6)   | 9.3 (-6.9, 25.5)   | 10.7 (-4.5, 25.9)  | 7.8 (-7.8, 23.4)   | 13.4 (-4.7, 31.6)  | 18.0 (-12.1, 48.0) |
| Qinghai          | Hainan        | 3.3 (-1.6, 8.2)    | 5.3 (-0.1, 10.6)   | 6.7 (1.1, 12.3)    | 4.6 (-0.2, 9.3)    | 8.6 (2.3, 14.9)    | 14.5 (3.1, 26.0)   |
| Qinghai          | Golog         | 10.5 (-0.8, 21.8)  | 17.1 (4.0, 30.3)   | 23.5 (7.0, 40.0)   | 12.2 (1.6, 22.7)   | 25.6 (9.8, 41.4)   | 52.6 (26.1, 79.2)  |
| Qinghai          | Yushu         | 6.0 (-5.0, 17.0)   | 9.1 (-1.6, 19.7)   | 11.8 (-0.2, 23.8)  | 6.6 (-3.1, 16.3)   | 13.2 (2.3, 24.1)   | 23.2 (10.1, 36.3)  |
| Qinghai          | Haixi         | 4.0 (-1.7, 9.6)    | 6.5 (0.5, 12.4)    | 8.3 (1.2, 15.4)    | 5.0 (-0.6, 10.7)   | 10.1 (3.6, 16.6)   | 19.2 (8.5, 29.9)   |
| <b>Northwest</b> |               |                    |                    |                    |                    |                    |                    |
| Shaanxi          | Xi'an         | 0.4 (-2.2, 3.0)    | 0.9 (-1.7, 3.6)    | 1.1 (-2.1, 4.3)    | 0.8 (-2.0, 3.6)    | 1.3 (-2.0, 4.6)    | 1.1 (-2.3, 4.4)    |
| Shaanxi          | Tongchuan     | 0.4 (-2.2, 3.0)    | 0.9 (-1.7, 3.6)    | 1.1 (-2.1, 4.3)    | 0.8 (-2.0, 3.6)    | 1.3 (-2.0, 4.6)    | 1.1 (-2.3, 4.4)    |
| Shaanxi          | Baoji         | 0.4 (-2.2, 3.0)    | 0.9 (-1.7, 3.6)    | 1.1 (-2.1, 4.3)    | 0.8 (-2.0, 3.6)    | 1.3 (-2.0, 4.6)    | 1.1 (-2.3, 4.4)    |
| Shaanxi          | Xianyang      | 0.4 (-2.2, 3.0)    | 0.9 (-1.7, 3.6)    | 1.1 (-2.1, 4.3)    | 0.8 (-2.0, 3.6)    | 1.3 (-2.0, 4.6)    | 1.1 (-2.3, 4.4)    |
| Shaanxi          | Weinan        | 2.9 (-0.7, 6.6)    | 5.8 (1.1, 10.5)    | 8.1 (1.2, 14.9)    | 4.4 (0.3, 8.6)     | 9.7 (3.2, 16.1)    | 17.9 (8.6, 27.2)   |
| Shaanxi          | Yan'an        | 1.0 (-1.6, 3.7)    | 2.3 (-0.4, 4.9)    | 3.1 (-1.3, 7.4)    | 2.0 (-1.1, 5.1)    | 3.9 (0.0, 7.8)     | 5.9 (1.6, 10.2)    |
| Shaanxi          | Hanzhong      | 0.4 (-2.1, 2.8)    | 0.8 (-2.0, 3.6)    | 0.8 (-2.1, 3.7)    | 0.6 (-1.9, 3.2)    | 1.0 (-2.4, 4.4)    | -0.1 (-5.0, 4.7)   |
| Shaanxi          | Yulin         | 1.2 (-2.0, 4.5)    | 3.0 (-0.5, 6.5)    | 4.2 (-1.1, 9.4)    | 2.4 (-1.5, 6.3)    | 5.2 (1.0, 9.4)     | 9.2 (3.2, 15.1)    |
| Shaanxi          | Ankang        | -0.2 (-2.6, 2.1)   | -0.5 (-3.0, 2.0)   | -1.0 (-4.7, 2.7)   | -0.3 (-2.7, 2.0)   | -1.0 (-3.8, 1.9)   | -4.0 (-8.3, 0.4)   |
| Shaanxi          | Shangluo      | 0.5 (-1.5, 2.4)    | 1.1 (-1.0, 3.2)    | 1.5 (-1.2, 4.3)    | 0.9 (-1.6, 3.3)    | 1.5 (-1.3, 4.3)    | 1.5 (-2.2, 5.2)    |
| Shaanxi          | Xixian        | 0.4 (-2.2, 3.0)    | 0.9 (-1.7, 3.6)    | 1.1 (-2.1, 4.3)    | 0.8 (-2.0, 3.6)    | 1.3 (-2.0, 4.6)    | 1.1 (-2.3, 4.4)    |
| Gansu            | Lanzhou       | 3.5 (0.1, 6.8)     | 6.4 (1.8, 10.9)    | 8.5 (3.2, 13.9)    | 4.6 (0.4, 8.8)     | 9.7 (3.9, 15.5)    | 19.7 (10.8, 28.6)  |
| Gansu            | Jiayuguan     | 3.3 (0.3, 6.3)     | 5.8 (1.8, 9.8)     | 8.3 (2.3, 14.3)    | 4.2 (1.1, 7.3)     | 9.1 (2.8, 15.4)    | 19.5 (8.9, 30.1)   |
| Gansu            | Jinchang      | 4.3 (-0.2, 8.7)    | 7.8 (1.8, 13.8)    | 10.6 (2.5, 18.7)   | 5.6 (1.4, 9.7)     | 11.9 (4.1, 19.7)   | 25.0 (11.7, 38.2)  |
| Gansu            | Baiyin        | 2.4 (-1.2, 6.1)    | 4.3 (-0.3, 8.9)    | 5.8 (0.6, 11.0)    | 3.1 (0.4, 5.9)     | 6.5 (1.3, 11.7)    | 12.9 (4.8, 20.9)   |
| Gansu            | Tianshui      | 5.7 (0.7, 10.7)    | 10.6 (3.2, 17.9)   | 14.1 (4.9, 23.3)   | 7.4 (1.7, 13.2)    | 16.1 (6.9, 25.4)   | 33.7 (19.0, 48.4)  |
| Gansu            | Wuwei         | 3.1 (-1.7, 7.8)    | 5.4 (-0.2, 11.1)   | 7.4 (0.9, 14.0)    | 4.1 (0.7, 7.5)     | 8.6 (1.8, 15.5)    | 17.5 (6.4, 28.5)   |
| Gansu            | Zhangye       | 3.1 (-0.3, 6.6)    | 5.7 (1.2, 10.2)    | 7.7 (1.6, 13.8)    | 4.2 (1.1, 7.3)     | 8.9 (2.9, 14.8)    | 18.2 (7.9, 28.5)   |
| Gansu            | Pingliang     | 2.8 (-0.1, 5.6)    | 5.3 (1.6, 9.1)     | 7.0 (1.7, 12.2)    | 3.8 (0.2, 7.4)     | 7.8 (2.5, 13.2)    | 15.4 (7.3, 23.6)   |
| Gansu            | Jiuquan       | 3.3 (0.3, 6.3)     | 5.8 (1.8, 9.8)     | 8.3 (2.3, 14.3)    | 4.2 (1.1, 7.3)     | 9.1 (2.8, 15.4)    | 19.5 (8.9, 30.1)   |
| Gansu            | Qingyang      | 2.8 (-0.6, 6.1)    | 5.6 (1.1, 10.0)    | 7.3 (1.2, 13.5)    | 4.1 (0.1, 8.0)     | 8.3 (2.5, 14.1)    | 16.8 (7.7, 25.8)   |
| Gansu            | Dingxi        | 5.7 (0.7, 10.7)    | 10.6 (3.2, 17.9)   | 14.1 (4.9, 23.3)   | 7.4 (1.7, 13.2)    | 16.1 (6.9, 25.4)   | 33.7 (19.0, 48.4)  |
| Gansu            | Longnan       | 1.3 (-1.2, 3.8)    | 2.6 (-0.4, 5.6)    | 3.2 (-0.3, 6.7)    | 2.0 (-0.2, 4.2)    | 3.9 (0.9, 7.0)     | 7.0 (3.0, 11.0)    |
| Gansu            | Linxia        | 3.7 (0.4, 6.9)     | 6.5 (1.9, 11.0)    | 8.7 (3.3, 14.2)    | 4.8 (0.3, 9.2)     | 9.8 (3.6, 16.0)    | 19.6 (10.4, 28.8)  |
| Gansu            | Gannan        | 6.9 (1.9, 11.8)    | 11.8 (3.9, 19.7)   | 16.0 (6.1, 25.9)   | 8.3 (0.8, 15.8)    | 18.0 (7.9, 28.1)   | 37.2 (20.0, 54.3)  |
| Ningxia          | Yinchuan      | 3.5 (-0.1, 7.0)    | 6.5 (2.2, 10.7)    | 8.9 (2.3, 15.5)    | 4.4 (1.4, 7.5)     | 10.0 (3.6, 16.5)   | 21.6 (10.6, 32.5)  |
| Ningxia          | Shizuishan    | 3.9 (0.2, 7.6)     | 7.1 (2.3, 11.9)    | 9.8 (2.4, 17.1)    | 4.7 (1.3, 8.1)     | 10.8 (3.7, 17.9)   | 23.2 (11.0, 35.4)  |
| Ningxia          | Wuzhong       | 3.5 (-0.1, 7.0)    | 6.5 (2.2, 10.7)    | 8.9 (2.3, 15.5)    | 4.4 (1.4, 7.5)     | 10.0 (3.6, 16.5)   | 21.6 (10.6, 32.5)  |
| Ningxia          | Guyuan        | 4.6 (0.4, 8.9)     | 8.8 (2.7, 14.8)    | 11.6 (3.2, 20.1)   | 6.2 (1.4, 11.1)    | 13.2 (4.7, 21.8)   | 27.7 (13.2, 42.1)  |
| Ningxia          | Zhongwei      | 3.2 (0.0, 6.5)     | 6.1 (1.9, 10.3)    | 8.4 (2.0, 14.9)    | 4.3 (1.6, 6.9)     | 9.5 (3.3, 15.6)    | 20.1 (9.7, 30.6)   |
| Xinjiang         | Urumqi        | 0.7 (-5.7, 7.1)    | 2.6 (-3.0, 8.3)    | 2.7 (-3.8, 9.1)    | 1.8 (-4.7, 8.4)    | 3.0 (-7.5, 13.4)   | 2.5 (-9.9, 14.8)   |

|          |          |                   |                   |                   |                  |                   |                    |
|----------|----------|-------------------|-------------------|-------------------|------------------|-------------------|--------------------|
| Xinjiang | Karamay  | 0.5 (-8.0, 9.1)   | 3.0 (-5.3, 11.3)  | 3.2 (-7.1, 13.5)  | 2.3 (-4.9, 9.4)  | 4.0 (-4.8, 12.8)  | 5.8 (-4.2, 15.9)   |
| Xinjiang | Turpan   | -0.1 (-7.1, 6.9)  | 0.7 (-5.6, 7.1)   | 0.5 (-6.0, 7.0)   | 0.7 (-3.9, 5.3)  | 1.0 (-5.9, 7.9)   | -0.1 (-8.2, 8.0)   |
| Xinjiang | Hami     | 0.9 (-4.0, 5.7)   | 2.3 (-1.9, 6.5)   | 2.6 (-2.3, 7.5)   | 1.6 (-2.2, 5.4)  | 3.1 (-3.2, 9.3)   | 4.1 (-3.0, 11.1)   |
| Xinjiang | Changji  | 2.2 (-5.0, 9.3)   | 5.5 (-1.8, 12.9)  | 5.6 (-2.4, 13.7)  | 3.7 (-2.5, 9.9)  | 6.9 (-1.8, 15.6)  | 10.8 (-0.2, 21.7)  |
| Xinjiang | Bortala  | 0.0 (-6.4, 6.4)   | 1.7 (-6.8, 10.2)  | 1.9 (-9.1, 12.9)  | 1.5 (-5.3, 8.4)  | 2.7 (-4.4, 9.8)   | 5.5 (-3.8, 14.8)   |
| Xinjiang | Bayingol | 0.2 (-3.9, 4.3)   | 1.1 (-3.7, 5.8)   | 1.1 (-3.4, 5.7)   | 1.1 (-1.9, 4.1)  | 1.5 (-3.1, 6.0)   | 0.6 (-5.2, 6.5)    |
| Xinjiang | Aksu     | 0.8 (-2.8, 4.3)   | 2.2 (-1.5, 5.8)   | 2.6 (-1.2, 6.4)   | 1.8 (-1.0, 4.6)  | 3.1 (-1.0, 7.2)   | 5.0 (0.2, 9.7)     |
| Xinjiang | Kizilsu  | 2.7 (-14.9, 20.4) | 8.2 (-14.3, 30.6) | 9.4 (-13.5, 32.4) | 6.0 (-9.6, 21.6) | 12.4 (-7.6, 32.4) | 17.0 (-11.7, 45.7) |
| Xinjiang | Kashgar  | 0.6 (-3.3, 4.4)   | 1.8 (-3.1, 6.7)   | 2.1 (-3.0, 7.2)   | 1.3 (-2.4, 5.0)  | 2.8 (-1.8, 7.4)   | 3.9 (-2.8, 10.6)   |
| Xinjiang | Hotan    | 0.5 (-4.4, 5.3)   | 1.2 (-4.5, 6.8)   | 1.5 (-4.4, 7.3)   | 1.1 (-3.3, 5.5)  | 1.7 (-4.3, 7.7)   | 2.0 (-5.1, 9.1)    |
| Xinjiang | Ili      | 1.5 (-3.7, 6.7)   | 4.4 (-0.5, 9.2)   | 5.3 (-0.9, 11.4)  | 4.0 (-1.0, 9.0)  | 6.9 (0.8, 13.0)   | 12.3 (5.2, 19.5)   |
| Xinjiang | Qoqek    | 2.7 (-5.7, 11.2)  | 6.2 (-2.0, 14.3)  | 7.1 (-3.1, 17.3)  | 4.3 (-1.6, 10.2) | 7.9 (1.4, 14.4)   | 14.7 (5.6, 23.9)   |
| Xinjiang | Altay    | 3.8 (-5.1, 12.6)  | 7.1 (-2.5, 16.7)  | 9.2 (-1.6, 19.9)  | 5.7 (-1.2, 12.7) | 10.8 (2.4, 19.2)  | 20.7 (10.7, 30.7)  |
| Xinjiang | Shihezi  | 0.4 (-6.3, 7.2)   | 3.0 (-4.0, 10.0)  | 3.4 (-4.6, 11.4)  | 3.0 (-3.0, 9.0)  | 4.3 (-3.4, 12.1)  | 6.6 (-3.7, 17.0)   |
| Xinjiang | Aral     | 0.3 (-3.5, 4.1)   | 1.5 (-2.5, 5.4)   | 1.7 (-2.5, 5.9)   | 1.3 (-1.5, 4.2)  | 2.1 (-1.8, 6.0)   | 2.7 (-2.8, 8.1)    |
| Xinjiang | Tumxuk   | 0.0 (-3.9, 3.9)   | 0.7 (-3.3, 4.7)   | 0.7 (-3.1, 4.6)   | 0.3 (-3.3, 3.9)  | 0.7 (-3.3, 4.7)   | 0.2 (-3.9, 4.3)    |
| Xinjiang | Wujiaqu  | 2.2 (-5.0, 9.3)   | 5.5 (-1.8, 12.9)  | 5.6 (-2.4, 13.7)  | 3.7 (-2.5, 9.9)  | 6.9 (-1.8, 15.6)  | 10.8 (-0.2, 21.7)  |

Note: eCI, empirical confidence interval; HFMD, hand, foot, and mouth disease; RCP, Representative Concentration Pathway; CJP, county under the jurisdiction of province. Pooled province level temperature-HFMD associations were used for projecting, with controlling for long-term trend and seasonality, relative humidity, day of the week, holidays (public holidays, and summer and winter school holidays), and autocorrelations in the residuals.

**Table S5.** Projected percentage change (and 95% eCIs) in HFMD incidence among children aged 0–14 years due to climate change (RCP 4.5 and 8.5 scenarios) by region and decade relative to baseline estimates for 2009–2014, accounting for projected changes in population sizes.

| Region         | RCP 4.5 (percentage change and 95% eCI) |                      |                      | RCP 8.5 (percentage change and 95% eCI) |                      |                      |
|----------------|-----------------------------------------|----------------------|----------------------|-----------------------------------------|----------------------|----------------------|
|                | 2030s                                   | 2050s                | 2090s                | 2030s                                   | 2050s                | 2090s                |
| Northeast      | -1.8 (-7.7, 4.2)                        | -9.4 (-17.1, -1.7)   | -26.2 (-34.1, -18.3) | -1.0 (-5.5, 3.5)                        | -5.5 (-11.9, 1.0)    | -13.2 (-23.5, -2.9)  |
| Inner Mongolia | -1.2 (-11.4, 8.9)                       | -8.3 (-20.2, 3.6)    | -25.0 (-37.3, -12.8) | 0.3 (-9.9, 10.5)                        | -3.4 (-18.6, 11.9)   | -10.9 (-36.7, 14.9)  |
| North          | -4.7 (-8.4, -0.9)                       | -13.8 (-18.1, -9.4)  | -30.9 (-36.0, -25.9) | -3.9 (-7.7, -0.1)                       | -11.7 (-17.7, -5.7)  | -26.0 (-36.1, -15.9) |
| Northwest      | -4.9 (-10.7, 0.8)                       | -13.7 (-20.7, -6.7)  | -31.2 (-38.2, -24.2) | -3.9 (-9.7, 2.0)                        | -12.0 (-21.3, -2.6)  | -27.0 (-41.5, -12.4) |
| East           | -6.6 (-13.2, 0.0)                       | -17.3 (-27.0, -7.6)  | -34.9 (-45.3, -24.6) | -6.8 (-14.6, 0.9)                       | -17.5 (-31.2, -3.9)  | -37.4 (-58.7, -16.1) |
| Central Region | -7.8 (-11.8, -3.7)                      | -19.0 (-24.3, -13.6) | -36.7 (-42.4, -31.1) | -8.0 (-12.6, -3.4)                      | -19.9 (-27.4, -12.4) | -40.6 (-52.0, -29.1) |
| Qingzang       | -3.9 (-13.8, 6.0)                       | -13.0 (-24.9, -1.0)  | -30.3 (-41.8, -18.7) | -3.0 (-13.3, 7.2)                       | -10.7 (-26.4, 5.0)   | -25.4 (-48.4, -2.3)  |
| Southwest      | -6.3 (-12.5, -0.1)                      | -16.6 (-25.4, -7.7)  | -34.3 (-44.2, -24.3) | -6.3 (-13.4, 0.8)                       | -16.4 (-29.6, -3.3)  | -35.3 (-57.9, -12.6) |
| South          | -5.2 (-10.7, 0.2)                       | -15.3 (-23.9, -6.7)  | -32.9 (-42.6, -23.3) | -5.3 (-11.5, 0.9)                       | -14.9 (-27.6, -2.3)  | -34.8 (-57.5, -12.2) |
| Overall        | -5.4 (-12.4, 1.7)                       | -15.2 (-25.3, -5.0)  | -32.6 (-43.6, -21.7) | -5.1 (-13.0, 2.8)                       | -14.3 (-28.7, 0.2)   | -31.3 (-56.5, -6.0)  |

Note: eCI, empirical confidence interval; HFMD, hand, foot, and mouth disease; RCP, Representative Concentration Pathway. Pooled province level temperature-HFMD associations were used for projecting, with controlling for long-term trend and seasonality, relative humidity, day of the week, holidays (public holidays, and summer and winter school holidays), and autocorrelations in the residuals. Data on population projections aged 0–14 years by 2100 were downloaded from the Population Division, United Nations (<https://esa.un.org/unpd/wpp/Download/Probabilistic/Population/>).

**Table S6.** Projected percentage change (and 95% eCIs) in HFMD incidence among children aged 0–14 years due to climate change (RCP 4.5 and 8.5 scenarios) by site and decade relative to baseline estimates for 2009–2014, accounting for projected changes in population sizes.

| Province or municipality | Prefecture/CJP | RCP 4.5 (percentage change and 95% eCI) |                      |                      | RCP 8.5 (percentage change and 95% eCI) |                      |                      |
|--------------------------|----------------|-----------------------------------------|----------------------|----------------------|-----------------------------------------|----------------------|----------------------|
|                          |                | 2030s                                   | 2050s                | 2090s                | 2030s                                   | 2050s                | 2090s                |
| <b>North</b>             |                |                                         |                      |                      |                                         |                      |                      |
| Beijing                  | Beijing        | -5.2 (-8.6, -1.7)                       | -14.6 (-17.4, -11.8) | -32.0 (-34.7, -29.2) | -4.6 (-7.7, -1.4)                       | -13.2 (-16.2, -10.3) | -28.9 (-32.3, -25.4) |
| Tianjin                  | Tianjin        | -5.8 (-8.4, -3.1)                       | -15.7 (-18.2, -13.3) | -33.2 (-35.3, -31.1) | -5.4 (-7.9, -2.8)                       | -14.9 (-17.5, -12.2) | -31.7 (-35.1, -28.3) |
| Hebei                    | Shijiazhuang   | -5.7 (-8.2, -3.2)                       | -15.3 (-17.4, -13.2) | -32.7 (-35.1, -30.3) | -5.1 (-7.6, -2.5)                       | -14.1 (-16.8, -11.4) | -30.6 (-33.7, -27.6) |
| Hebei                    | Tangshan       | -5.3 (-8.8, -1.9)                       | -14.9 (-17.9, -11.8) | -32.3 (-34.8, -29.7) | -4.5 (-7.7, -1.3)                       | -13.2 (-16.0, -10.5) | -28.9 (-32.5, -25.4) |
| Hebei                    | Qinhuangdao    | -4.5 (-8.4, -0.7)                       | -13.7 (-17.4, -10.1) | -31.0 (-34.0, -27.9) | -3.6 (-7.8, 0.5)                        | -11.8 (-15.2, -8.5)  | -26.7 (-30.9, -22.4) |
| Hebei                    | Handan         | -5.6 (-8.3, -2.8)                       | -15.3 (-17.8, -12.9) | -32.7 (-35.2, -30.2) | -5.1 (-7.7, -2.5)                       | -14.1 (-16.8, -11.5) | -30.6 (-33.9, -27.3) |
| Hebei                    | Xingtai        | -5.6 (-8.3, -2.8)                       | -15.3 (-17.8, -12.9) | -32.7 (-35.2, -30.2) | -5.1 (-7.7, -2.5)                       | -14.1 (-16.8, -11.5) | -30.6 (-33.9, -27.3) |
| Hebei                    | Baoding        | -5.4 (-8.4, -2.4)                       | -14.9 (-17.8, -12.1) | -32.4 (-34.9, -29.8) | -4.9 (-7.7, -2.0)                       | -13.7 (-16.6, -10.8) | -29.6 (-33.2, -26.1) |
| Hebei                    | Zhangjiakou    | -4.5 (-8.4, -0.5)                       | -13.6 (-17.2, -10.0) | -30.7 (-34.6, -26.9) | -3.6 (-7.4, 0.2)                        | -11.5 (-14.7, -8.2)  | -26.1 (-30.5, -21.7) |
| Hebei                    | Chengde        | -4.9 (-8.2, -1.6)                       | -14.3 (-17.2, -11.4) | -31.6 (-34.5, -28.7) | -4.0 (-7.4, -0.7)                       | -12.4 (-15.7, -9.0)  | -27.3 (-31.2, -23.3) |
| Hebei                    | Cangzhou       | -5.6 (-8.3, -2.8)                       | -15.3 (-17.7, -12.9) | -32.7 (-35.0, -30.5) | -5.1 (-7.7, -2.6)                       | -14.3 (-16.6, -11.9) | -30.4 (-33.3, -27.5) |
| Hebei                    | Langfang       | -5.3 (-8.6, -2.1)                       | -14.8 (-17.5, -12.1) | -32.3 (-34.9, -29.7) | -4.7 (-7.9, -1.6)                       | -13.6 (-16.6, -10.6) | -29.4 (-32.9, -25.9) |
| Hebei                    | Hengshui       | -5.6 (-8.0, -3.2)                       | -15.3 (-17.7, -13.0) | -32.7 (-35.0, -30.4) | -5.2 (-7.6, -2.8)                       | -14.2 (-16.6, -11.7) | -30.4 (-33.9, -26.9) |
| Shanxi                   | Taiyuan        | -4.2 (-7.9, -0.5)                       | -12.8 (-16.5, -9.0)  | -29.7 (-34.5, -25.0) | -3.2 (-6.4, -0.1)                       | -10.0 (-14.7, -5.3)  | -22.8 (-29.6, -16.1) |
| Shanxi                   | Datong         | -3.1 (-7.7, 1.6)                        | -11.3 (-15.7, -6.9)  | -28.1 (-33.9, -22.2) | -2.2 (-5.6, 1.2)                        | -7.8 (-12.9, -2.8)   | -18.5 (-26.7, -10.3) |
| Shanxi                   | Yangquan       | -4.5 (-7.9, -1.1)                       | -13.4 (-16.6, -10.1) | -30.5 (-34.3, -26.7) | -3.7 (-6.5, -0.9)                       | -11.1 (-14.8, -7.4)  | -24.8 (-30.2, -19.3) |
| Shanxi                   | Changzhi       | -3.9 (-7.9, 0.1)                        | -12.5 (-16.6, -8.3)  | -29.4 (-34.7, -24.2) | -3.0 (-6.5, 0.5)                        | -9.7 (-14.8, -4.6)   | -22.3 (-29.5, -15.0) |
| Shanxi                   | Jincheng       | -4.5 (-7.4, -1.6)                       | -13.3 (-16.4, -10.2) | -30.5 (-34.2, -26.8) | -3.8 (-6.6, -1.0)                       | -11.3 (-15.6, -7.0)  | -24.9 (-30.2, -19.5) |
| Shanxi                   | Shuozhou       | -2.6 (-7.4, 2.2)                        | -10.1 (-15.4, -4.8)  | -26.8 (-34.3, -19.3) | -1.1 (-5.6, 3.4)                        | -5.6 (-12.9, 1.6)    | -15.1 (-26.6, -3.7)  |
| Shanxi                   | Jinzhong       | -4.2 (-7.9, -0.5)                       | -12.8 (-16.5, -9.0)  | -29.7 (-34.5, -25.0) | -3.2 (-6.4, -0.1)                       | -10.0 (-14.7, -5.3)  | -22.8 (-29.6, -16.1) |
| Shanxi                   | Yuncheng       | -4.7 (-7.5, -1.9)                       | -13.6 (-16.4, -10.7) | -30.7 (-34.1, -27.3) | -3.7 (-6.5, -0.9)                       | -11.4 (-15.2, -7.5)  | -25.2 (-29.8, -20.5) |
| Shanxi                   | Xinzhou        | -3.7 (-7.7, 0.3)                        | -12.1 (-16.2, -8.0)  | -29.0 (-34.3, -23.7) | -2.8 (-6.2, 0.7)                        | -9.0 (-14.3, -3.8)   | -21.0 (-28.7, -13.3) |
| Shanxi                   | Linfen         | -4.4 (-7.7, -1.1)                       | -13.2 (-16.4, -10.0) | -30.2 (-34.2, -26.2) | -3.5 (-6.6, -0.4)                       | -10.8 (-15.2, -6.4)  | -24.3 (-30.1, -18.6) |
| Shanxi                   | Lvliang        | -3.8 (-7.6, 0.1)                        | -12.0 (-16.1, -8.0)  | -28.9 (-34.2, -23.5) | -2.7 (-6.4, 1.0)                        | -8.9 (-14.5, -3.2)   | -20.9 (-29.1, -12.8) |
| <b>Inner Mongolia</b>    |                |                                         |                      |                      |                                         |                      |                      |
| Inner Mongolia           | Hohhot         | -2.3 (-7.8, 3.2)                        | -9.9 (-15.4, -4.3)   | -26.7 (-33.3, -20.1) | -1.1 (-6.0, 3.8)                        | -6.1 (-10.9, -1.3)   | -16.0 (-23.7, -8.2)  |
| Inner Mongolia           | Baotou         | -2.8 (-7.9, 2.3)                        | -10.3 (-15.5, -5.1)  | -27.4 (-33.5, -21.2) | -1.5 (-5.4, 2.3)                        | -6.8 (-12.0, -1.5)   | -17.2 (-25.0, -9.3)  |
| Inner Mongolia           | Wuhai          | -3.4 (-7.1, 0.4)                        | -11.6 (-15.3, -7.8)  | -28.6 (-33.3, -23.8) | -2.5 (-5.3, 0.4)                        | -8.5 (-13.4, -3.6)   | -20.5 (-27.3, -13.7) |
| Inner Mongolia           | Chifeng        | -2.7 (-8.5, 3.1)                        | -10.9 (-16.3, -5.5)  | -27.8 (-33.3, -22.4) | -1.4 (-7.2, 4.5)                        | -7.4 (-12.3, -2.5)   | -18.1 (-25.1, -11.2) |
| Inner Mongolia           | Tongliao       | -2.0 (-9.5, 5.5)                        | -10.1 (-16.6, -3.6)  | -26.7 (-33.4, -20.0) | -0.8 (-7.6, 6.0)                        | -6.0 (-12.6, 0.6)    | -15.0 (-23.1, -7.0)  |
| Inner Mongolia           | Ordos          | -2.4 (-7.7, 2.8)                        | -9.6 (-15.1, -4.2)   | -26.4 (-32.8, -20.0) | -1.1 (-5.3, 3.0)                        | -5.8 (-11.6, 0.0)    | -15.6 (-23.9, -7.3)  |
| Inner Mongolia           | Hulunber       | 6.8 (-14.3, 28.0)                       | 3.8 (-17.6, 25.2)    | -13.0 (-33.3, 7.4)   | 11.0 (-7.9, 29.8)                       | 15.6 (-4.9, 36.1)    | 24.5 (1.6, 47.4)     |
| Inner Mongolia           | Bayan Nur      | -2.4 (-8.1, 3.3)                        | -9.7 (-15.2, -4.3)   | -26.8 (-33.2, -20.3) | -0.9 (-4.8, 3.0)                        | -5.9 (-11.9, 0.2)    | -16.0 (-24.5, -7.6)  |
| Inner Mongolia           | Ulanqab        | -1.0 (-7.9, 5.8)                        | -7.8 (-14.8, -0.9)   | -24.3 (-32.6, -15.9) | 0.4 (-5.3, 6.1)                         | -2.6 (-8.8, 3.6)     | -10.2 (-20.5, 0.0)   |
| Inner Mongolia           | Hinggan        | -0.4 (-9.8, 8.9)                        | -8.0 (-18.1, 2.0)    | -24.6 (-33.4, -15.9) | 1.1 (-6.1, 8.3)                         | -2.9 (-10.1, 4.3)    | -9.1 (-19.1, 0.9)    |
| Inner Mongolia           | Xilin Gol      | 0.3 (-11.2, 11.9)                       | -4.9 (-17.7, 7.9)    | -20.5 (-34.0, -7.1)  | 1.8 (-9.0, 12.7)                        | 2.8 (-9.4, 15.0)     | 0.4 (-14.6, 15.5)    |
| Inner Mongolia           | Alxa           | -2.6 (-7.4, 2.1)                        | -10.4 (-15.1, -5.7)  | -27.4 (-32.7, -22.0) | -1.7 (-5.3, 1.9)                        | -7.1 (-14.0, -0.2)   | -18.0 (-26.3, -9.7)  |
| <b>Northeast</b>         |                |                                         |                      |                      |                                         |                      |                      |
| Liaoning                 | Shenyang       | -1.6 (-8.1, 4.9)                        | -9.2 (-16.1, -2.4)   | -25.8 (-33.3, -18.3) | -1.1 (-5.2, 3.1)                        | -5.3 (-10.5, -0.1)   | -13.1 (-21.1, -5.0)  |
| Liaoning                 | Dalian         | -1.7 (-7.7, 4.3)                        | -8.6 (-16.6, -0.5)   | -25.3 (-33.6, -17.1) | -1.0 (-6.4, 4.3)                        | -5.0 (-11.9, 1.9)    | -13.5 (-24.5, -2.5)  |
| Liaoning                 | Anshan         | -1.9 (-7.9, 4.1)                        | -9.4 (-16.1, -2.6)   | -26.2 (-33.3, -19.1) | -1.2 (-5.4, 3.0)                        | -5.8 (-11.1, -0.5)   | -14.3 (-22.8, -5.9)  |
| Liaoning                 | Fushun         | -1.6 (-8.1, 4.9)                        | -9.2 (-16.1, -2.4)   | -25.8 (-33.3, -18.3) | -1.1 (-5.2, 3.1)                        | -5.3 (-10.5, -0.1)   | -13.1 (-21.1, -5.0)  |
| Liaoning                 | Benxi          | -1.9 (-7.8, 4.0)                        | -9.4 (-16.2, -2.6)   | -26.2 (-33.2, -19.2) | -1.2 (-5.2, 2.9)                        | -5.8 (-11.0, -0.6)   | -14.1 (-22.4, -5.9)  |
| Liaoning                 | Dandong        | -2.3 (-7.5, 3.0)                        | -9.7 (-15.4, -4.0)   | -26.7 (-32.8, -20.6) | -1.5 (-5.6, 2.6)                        | -6.3 (-11.0, -1.7)   | -15.3 (-22.7, -7.9)  |
| Liaoning                 | Jinzhou        | -2.5 (-6.9, 1.9)                        | -10.4 (-15.8, -4.9)  | -27.2 (-33.5, -20.9) | -1.9 (-5.8, 2.0)                        | -7.0 (-11.7, -2.3)   | -16.6 (-24.9, -8.4)  |
| Liaoning                 | Yingkou        | -2.7 (-7.3, 1.9)                        | -10.7 (-16.1, -5.4)  | -27.5 (-33.5, -21.5) | -2.2 (-5.8, 1.3)                        | -7.6 (-12.0, -3.2)   | -17.7 (-25.6, -9.7)  |
| Liaoning                 | Fuxin          | -2.1 (-7.4, 3.3)                        | -10.3 (-16.0, -4.5)  | -27.0 (-33.8, -20.2) | -1.6 (-5.4, 2.1)                        | -6.7 (-11.6, -1.8)   | -15.8 (-24.4, -7.2)  |
| Liaoning                 | Liaoyang       | -2.0 (-7.8, 3.8)                        | -9.8 (-16.5, -3.2)   | -26.6 (-33.4, -19.8) | -1.5 (-5.3, 2.4)                        | -6.4 (-11.5, -1.3)   | -15.3 (-23.4, -7.3)  |
| Liaoning                 | Panjin         | -2.7 (-7.3, 1.9)                        | -10.7 (-16.1, -5.4)  | -27.5 (-33.5, -21.5) | -2.2 (-5.8, 1.3)                        | -7.6 (-12.0, -3.2)   | -17.7 (-25.6, -9.7)  |
| Liaoning                 | Tieling        | -1.4 (-7.8, 4.9)                        | -9.2 (-15.7, -2.6)   | -25.8 (-33.2, -18.4) | -1.0 (-4.8, 2.9)                        | -5.3 (-10.6, 0.0)    | -13.0 (-20.9, -5.1)  |
| Liaoning                 | Chaoyang       | -2.0 (-7.2, 3.2)                        | -9.6 (-16.0, -3.3)   | -26.3 (-33.8, -18.8) | -1.0 (-5.5, 3.5)                        | -5.5 (-10.9, -0.1)   | -13.8 (-23.5, -4.2)  |
| Liaoning                 | Huludao        | -2.6 (-7.0, 1.8)                        | -10.5 (-15.9, -5.1)  | -27.2 (-33.7, -20.8) | -2.1 (-5.8, 1.6)                        | -7.2 (-11.8, -2.6)   | -17.1 (-25.4, -8.8)  |
| Jilin                    | Changchun      | -1.5 (-8.0, 5.0)                        | -9.3 (-17.4, -1.3)   | -25.9 (-34.2, -17.7) | -0.8 (-5.0, 3.4)                        | -5.4 (-11.4, 0.5)    | -13.3 (-21.8, -4.8)  |
| Jilin                    | Jilin          | -1.7 (-8.4, 5.0)                        | -9.2 (-17.7, -0.8)   | -25.8 (-34.5, -17.0) | -0.7 (-4.6, 3.2)                        | -4.8 (-11.3, 1.7)    | -11.9 (-21.2, -2.7)  |
| Jilin                    | Siping         | -2.1 (-7.8, 3.6)                        | -10.5 (-17.0, -3.9)  | -27.0 (-34.1, -19.8) | -1.6 (-5.4, 2.2)                        | -6.5 (-12.3, -0.6)   | -14.7 (-22.4, -7.0)  |

|              |              |                     |                      |                      |                     |                      |                      |
|--------------|--------------|---------------------|----------------------|----------------------|---------------------|----------------------|----------------------|
| Jilin        | Liaoyuan     | -1.6 (-7.9, 4.7)    | -9.3 (-16.6, -2.0)   | -26.1 (-33.9, -18.2) | -0.9 (-4.6, 2.9)    | -5.3 (-11.2, 0.6)    | -13.2 (-21.6, -4.8)  |
| Jilin        | Tonghua      | -1.9 (-8.2, 4.4)    | -9.5 (-16.6, -2.4)   | -26.2 (-33.5, -18.9) | -1.0 (-5.2, 3.2)    | -5.4 (-11.1, 0.4)    | -13.6 (-21.9, -5.4)  |
| Jilin        | Baishan      | -1.9 (-7.9, 4.0)    | -9.6 (-16.6, -2.7)   | -26.5 (-33.6, -19.3) | -1.4 (-5.1, 2.4)    | -6.0 (-11.8, -0.3)   | -14.6 (-22.9, -6.2)  |
| Jilin        | Songyuan     | -1.6 (-7.5, 4.3)    | -9.8 (-17.2, -2.3)   | -26.7 (-34.5, -19.0) | -1.2 (-5.4, 3.0)    | -6.1 (-11.8, -0.3)   | -14.2 (-23.4, -5.0)  |
| Jilin        | Baicheng     | -1.8 (-7.6, 3.9)    | -10.1 (-17.5, -2.7)  | -26.9 (-34.9, -18.9) | -1.3 (-5.8, 3.3)    | -6.2 (-12.4, 0.0)    | -14.3 (-24.0, -4.7)  |
| Jilin        | Yanbian      | -1.8 (-8.4, 4.8)    | -9.4 (-18.1, -0.7)   | -26.0 (-34.3, -17.7) | -1.1 (-4.5, 2.2)    | -5.7 (-12.0, 0.7)    | -13.6 (-22.3, -4.9)  |
| Heilongjiang | Harbin       | -1.6 (-8.1, 5.0)    | -9.4 (-17.6, -1.2)   | -26.3 (-34.7, -17.9) | -1.0 (-5.3, 3.2)    | -5.5 (-11.8, 0.8)    | -13.1 (-22.1, -4.1)  |
| Heilongjiang | Qiqihar      | -1.5 (-8.0, 5.1)    | -9.2 (-17.5, -0.9)   | -26.1 (-35.2, -17.0) | -0.4 (-5.4, 4.6)    | -5.1 (-11.7, 1.5)    | -12.4 (-22.3, -2.4)  |
| Heilongjiang | Jixi         | -1.5 (-7.5, 4.4)    | -9.0 (-17.2, -0.9)   | -26.0 (-33.8, -18.2) | -0.7 (-4.7, 3.3)    | -5.1 (-11.0, 0.8)    | -12.6 (-20.7, -4.5)  |
| Heilongjiang | Hegang       | -1.7 (-7.5, 4.1)    | -9.3 (-18.4, -0.2)   | -26.1 (-35.0, -17.3) | -0.9 (-5.3, 3.6)    | -5.1 (-11.4, 1.2)    | -11.8 (-21.3, -2.2)  |
| Heilongjiang | Shuangyashan | -1.7 (-7.5, 4.1)    | -9.3 (-18.4, -0.2)   | -26.1 (-35.0, -17.3) | -0.9 (-5.3, 3.6)    | -5.1 (-11.4, 1.2)    | -11.8 (-21.3, -2.2)  |
| Heilongjiang | Daqing       | -1.7 (-7.5, 4.0)    | -9.8 (-18.3, -1.3)   | -26.8 (-35.5, -18.2) | -0.9 (-5.4, 3.6)    | -5.9 (-12.7, 0.8)    | -12.9 (-22.6, -3.2)  |
| Heilongjiang | Yichun       | -0.9 (-7.4, 5.5)    | -7.9 (-17.2, 1.4)    | -24.6 (-33.6, -15.6) | 0.6 (-4.5, 5.7)     | -3.2 (-9.2, 2.8)     | -8.9 (-19.3, 1.5)    |
| Heilongjiang | Jiamusi      | -1.7 (-7.5, 4.1)    | -9.3 (-18.4, -0.2)   | -26.1 (-35.0, -17.3) | -0.9 (-5.3, 3.6)    | -5.1 (-11.4, 1.2)    | -11.8 (-21.3, -2.2)  |
| Heilongjiang | Qitaihe      | -1.5 (-7.5, 4.4)    | -9.0 (-17.2, -0.9)   | -26.0 (-33.8, -18.2) | -0.7 (-4.7, 3.3)    | -5.1 (-11.0, 0.8)    | -12.6 (-20.7, -4.5)  |
| Heilongjiang | Mudanjiang   | -1.4 (-8.0, 5.2)    | -9.1 (-17.6, -0.6)   | -25.8 (-34.1, -17.4) | -0.9 (-4.6, 2.8)    | -5.0 (-11.2, 1.2)    | -12.2 (-20.8, -3.7)  |
| Heilongjiang | Heihe        | -1.0 (-7.3, 5.3)    | -7.7 (-17.2, 1.9)    | -24.6 (-33.8, -15.5) | 1.1 (-4.5, 6.8)     | -2.4 (-10.7, 6.0)    | -7.4 (-20.0, 5.2)    |
| Heilongjiang | Suihua       | -1.7 (-8.3, 4.9)    | -9.2 (-18.5, 0.2)    | -26.0 (-35.6, -16.5) | -1.3 (-6.2, 3.7)    | -5.2 (-13.3, 2.8)    | -11.0 (-20.8, -1.2)  |
| Heilongjiang | DaXingAnLing | -0.4 (-8.3, 7.5)    | -6.4 (-17.4, 4.6)    | -23.3 (-33.8, -12.9) | 1.9 (-4.6, 8.3)     | -0.7 (-10.4, 9.0)    | -4.1 (-18.1, 9.9)    |
| <b>East</b>  |              |                     |                      |                      |                     |                      |                      |
| Shanghai     | Shanghai     | -7.8 (-9.7, -5.8)   | -18.9 (-21.5, -16.3) | -36.6 (-39.3, -33.9) | -8.0 (-11.1, -4.9)  | -19.8 (-23.0, -16.5) | -40.3 (-45.1, -35.5) |
| Jiangsu      | Nanjing      | -9.2 (-12.0, -6.4)  | -21.5 (-25.8, -17.2) | -39.4 (-44.2, -34.6) | -9.8 (-15.0, -4.7)  | -23.7 (-30.2, -17.1) | -47.0 (-54.8, -39.2) |
| Jiangsu      | Wuxi         | -9.6 (-12.7, -6.4)  | -21.9 (-26.7, -17.1) | -39.9 (-44.7, -35.1) | -10.0 (-15.7, -4.4) | -24.4 (-31.5, -17.2) | -48.3 (-57.7, -38.9) |
| Jiangsu      | Xuzhou       | -8.7 (-12.3, -5.1)  | -20.5 (-24.8, -16.2) | -38.6 (-43.4, -33.7) | -9.2 (-13.8, -4.6)  | -22.1 (-27.9, -16.3) | -44.7 (-52.8, -36.6) |
| Jiangsu      | Changzhou    | -9.6 (-12.7, -6.4)  | -21.9 (-26.7, -17.1) | -39.9 (-44.7, -35.1) | -10.0 (-15.7, -4.4) | -24.4 (-31.5, -17.2) | -48.3 (-57.7, -38.9) |
| Jiangsu      | Suzhou       | -9.6 (-13.2, -6.0)  | -22.0 (-27.1, -17.0) | -40.1 (-45.7, -34.5) | -10.6 (-16.1, -5.1) | -24.7 (-32.1, -17.4) | -48.8 (-58.6, -39.0) |
| Jiangsu      | Nantong      | -9.0 (-12.1, -6.0)  | -21.0 (-25.5, -16.5) | -39.0 (-43.6, -34.4) | -9.7 (-14.3, -5.2)  | -23.2 (-29.6, -16.8) | -46.0 (-54.4, -37.7) |
| Jiangsu      | Lianyungang  | -8.0 (-11.9, -4.1)  | -19.3 (-24.5, -14.1) | -37.4 (-42.8, -32.1) | -8.2 (-12.5, -3.9)  | -20.6 (-26.2, -15.0) | -42.0 (-51.0, -32.9) |
| Jiangsu      | Huai'an      | -8.6 (-12.0, -5.2)  | -20.4 (-25.0, -15.8) | -38.3 (-43.0, -33.6) | -9.4 (-14.6, -4.3)  | -22.3 (-28.4, -16.1) | -44.6 (-52.4, -36.8) |
| Jiangsu      | Yancheng     | -8.9 (-12.4, -5.4)  | -21.1 (-26.7, -15.5) | -39.1 (-44.7, -33.6) | -9.6 (-14.5, -4.6)  | -23.1 (-30.3, -15.9) | -46.5 (-56.9, -36.2) |
| Jiangsu      | Yangzhou     | -8.7 (-11.7, -5.7)  | -20.4 (-24.8, -15.9) | -38.2 (-42.6, -33.8) | -9.2 (-14.1, -4.2)  | -22.0 (-27.7, -16.3) | -44.1 (-51.1, -37.1) |
| Jiangsu      | Zhenjiang    | -9.2 (-12.0, -6.4)  | -21.5 (-25.8, -17.2) | -39.4 (-44.2, -34.6) | -9.8 (-15.0, -4.7)  | -23.7 (-30.2, -17.1) | -47.0 (-54.8, -39.2) |
| Jiangsu      | Taizhou      | -8.7 (-11.7, -5.7)  | -20.4 (-24.8, -15.9) | -38.2 (-42.6, -33.8) | -9.2 (-14.1, -4.2)  | -22.0 (-27.7, -16.3) | -44.1 (-51.1, -37.1) |
| Jiangsu      | Suqian       | -8.6 (-12.0, -5.2)  | -20.4 (-25.0, -15.8) | -38.3 (-43.0, -33.6) | -9.4 (-14.6, -4.3)  | -22.3 (-28.4, -16.1) | -44.6 (-52.4, -36.8) |
| Zhejiang     | Hangzhou     | -9.6 (-13.9, -5.3)  | -22.4 (-28.5, -16.4) | -40.7 (-47.1, -34.2) | -10.9 (-18.2, -3.6) | -25.4 (-34.3, -16.5) | -51.6 (-64.4, -38.8) |
| Zhejiang     | Ningbo       | -9.7 (-14.7, -4.8)  | -22.4 (-29.4, -15.5) | -40.6 (-47.9, -33.3) | -10.6 (-17.2, -4.0) | -25.0 (-33.6, -16.4) | -51.8 (-65.4, -38.2) |
| Zhejiang     | Wenzhou      | -7.8 (-11.0, -4.7)  | -19.6 (-24.1, -15.2) | -37.5 (-41.5, -33.5) | -8.6 (-13.5, -3.7)  | -21.0 (-26.3, -15.6) | -44.1 (-52.2, -35.9) |
| Zhejiang     | Jiaxing      | -9.2 (-13.3, -5.2)  | -21.6 (-27.8, -15.3) | -39.6 (-46.3, -32.8) | -10.2 (-16.3, -4.1) | -24.0 (-31.9, -16.1) | -48.9 (-60.5, -37.3) |
| Zhejiang     | Huzhou       | -9.5 (-13.7, -5.4)  | -22.3 (-28.7, -15.8) | -40.6 (-47.5, -33.6) | -11.0 (-17.1, -4.9) | -25.4 (-34.6, -16.2) | -50.6 (-62.5, -38.7) |
| Zhejiang     | Shaoxing     | -9.6 (-13.8, -5.3)  | -22.3 (-28.3, -16.4) | -40.6 (-46.9, -34.2) | -10.8 (-18.0, -3.7) | -25.3 (-34.0, -16.5) | -51.3 (-63.8, -38.8) |
| Zhejiang     | Jinhua       | -10.7 (-16.4, -4.9) | -24.4 (-31.2, -17.5) | -42.9 (-49.9, -35.8) | -12.4 (-20.5, -4.3) | -28.4 (-38.6, -18.2) | -56.8 (-71.4, -42.1) |
| Zhejiang     | Quzhou       | -10.0 (-14.8, -5.2) | -23.1 (-30.1, -16.1) | -41.6 (-48.5, -34.6) | -11.5 (-18.9, -4.0) | -26.6 (-36.9, -16.3) | -53.3 (-67.7, -38.9) |
| Zhejiang     | Zhoushan     | -9.1 (-13.0, -5.3)  | -21.6 (-26.9, -16.3) | -39.7 (-46.2, -33.3) | -9.7 (-16.3, -3.2)  | -23.7 (-31.5, -15.8) | -49.3 (-61.8, -36.9) |
| Zhejiang     | Taizhou      | -8.5 (-12.6, -4.5)  | -20.5 (-25.5, -15.6) | -38.6 (-43.8, -33.5) | -9.2 (-14.1, -4.2)  | -22.4 (-28.4, -16.4) | -47.3 (-57.8, -36.8) |
| Zhejiang     | Lishui       | -11.1 (-17.3, -4.8) | -24.9 (-32.0, -17.7) | -43.5 (-51.2, -35.7) | -12.4 (-20.3, -4.5) | -29.3 (-39.7, -18.9) | -59.2 (-75.4, -43.1) |
| Anhui        | Hefei        | -7.9 (-10.0, -5.7)  | -19.0 (-21.6, -16.4) | -36.7 (-39.4, -34.0) | -8.0 (-11.5, -4.4)  | -19.8 (-23.6, -16.0) | -40.2 (-44.6, -35.7) |
| Anhui        | Wuhu         | -7.8 (-9.9, -5.6)   | -19.0 (-21.7, -16.3) | -36.8 (-39.7, -33.9) | -8.0 (-11.2, -4.7)  | -19.9 (-23.7, -16.1) | -40.3 (-44.7, -35.8) |
| Anhui        | Bengbu       | -7.6 (-10.2, -4.9)  | -18.5 (-21.7, -15.4) | -36.2 (-39.2, -33.2) | -7.8 (-11.4, -4.1)  | -19.2 (-23.1, -15.3) | -39.1 (-44.1, -34.1) |
| Anhui        | Huainan      | -7.3 (-9.6, -4.9)   | -18.0 (-20.8, -15.3) | -35.7 (-38.5, -33.0) | -7.4 (-10.9, -3.9)  | -18.5 (-22.1, -15.0) | -37.9 (-42.5, -33.4) |
| Anhui        | Ma'anshan    | -7.7 (-9.6, -5.7)   | -18.7 (-21.2, -16.3) | -36.4 (-39.0, -33.8) | -7.8 (-11.0, -4.6)  | -19.5 (-23.1, -15.8) | -39.6 (-43.7, -35.5) |
| Anhui        | HuaiBei      | -7.3 (-10.0, -4.5)  | -18.0 (-20.6, -15.4) | -35.7 (-38.2, -33.3) | -7.3 (-10.2, -4.4)  | -18.3 (-21.7, -14.9) | -37.8 (-42.1, -33.5) |
| Anhui        | Tongling     | -8.1 (-10.8, -5.4)  | -19.6 (-22.9, -16.3) | -37.3 (-40.7, -33.8) | -8.3 (-12.1, -4.5)  | -20.7 (-25.1, -16.3) | -41.7 (-47.0, -36.4) |
| Anhui        | Anqing       | -8.0 (-10.5, -5.5)  | -19.4 (-22.4, -16.4) | -37.0 (-40.2, -33.9) | -8.2 (-11.7, -4.7)  | -20.4 (-24.4, -16.4) | -41.2 (-46.0, -36.3) |
| Anhui        | Huangshan    | -7.9 (-10.6, -5.2)  | -19.3 (-22.9, -15.7) | -37.2 (-40.5, -33.8) | -8.3 (-12.1, -4.5)  | -20.5 (-25.1, -15.8) | -41.8 (-47.9, -35.8) |
| Anhui        | Chuzhou      | -7.6 (-9.7, -5.5)   | -18.5 (-21.1, -15.9) | -36.2 (-38.7, -33.7) | -7.8 (-11.0, -4.5)  | -19.1 (-22.6, -15.7) | -39.0 (-43.2, -34.8) |
| Anhui        | Fuyang       | -7.7 (-10.5, -4.9)  | -18.5 (-21.7, -15.3) | -36.1 (-38.7, -33.4) | -7.7 (-10.9, -4.4)  | -18.9 (-23.0, -14.8) | -38.8 (-44.0, -33.6) |
| Anhui        | Suzhou       | -7.3 (-10.0, -4.5)  | -18.0 (-20.6, -15.4) | -35.7 (-38.2, -33.3) | -7.3 (-10.2, -4.4)  | -18.3 (-21.7, -14.9) | -37.8 (-42.1, -33.5) |
| Anhui        | Lu'an        | -8.0 (-11.0, -5.0)  | -19.0 (-22.2, -15.8) | -36.6 (-39.4, -33.7) | -8.0 (-11.4, -4.6)  | -19.7 (-23.7, -15.7) | -40.1 (-44.9, -35.3) |
| Anhui        | Bozhou       | -7.5 (-9.8, -5.2)   | -18.1 (-20.4, -15.8) | -35.8 (-38.0, -33.6) | -7.3 (-10.0, -4.6)  | -18.5 (-22.0, -15.1) | -38.0 (-42.9, -33.2) |
| Anhui        | Chizhou      | -8.0 (-10.4, -5.6)  | -19.4 (-22.4, -16.4) | -37.0 (-40.1, -33.9) | -8.2 (-11.7, -4.7)  | -20.4 (-24.4, -16.4) | -41.1 (-45.9, -36.3) |



|                       |              |                    |                      |                      |                     |                      |                      |
|-----------------------|--------------|--------------------|----------------------|----------------------|---------------------|----------------------|----------------------|
| Anhui                 | Xuancheng    | -7.7 (-9.9, -5.5)  | -18.9 (-21.7, -16.1) | -36.6 (-39.3, -33.8) | -7.8 (-11.6, -4.0)  | -19.7 (-23.9, -15.5) | -40.2 (-45.2, -35.3) |
| Fujian                | Fuzhou       | -2.9 (-8.7, 2.9)   | -12.5 (-20.3, -4.7)  | -30.2 (-37.7, -22.8) | -3.8 (-8.4, 0.7)    | -11.7 (-19.6, -3.7)  | -31.9 (-44.3, -19.6) |
| Fujian                | Xiamen       | -3.0 (-6.7, 0.7)   | -12.6 (-18.9, -6.2)  | -30.1 (-35.7, -24.6) | -3.4 (-8.3, 1.6)    | -11.6 (-17.9, -5.3)  | -31.5 (-39.4, -23.7) |
| Fujian                | Putian       | -1.5 (-7.3, 4.3)   | -9.8 (-18.4, -1.2)   | -26.9 (-34.9, -19.0) | -1.5 (-6.5, 3.4)    | -7.7 (-16.0, 0.6)    | -24.5 (-34.4, -14.7) |
| Fujian                | Sanming      | 0.2 (-8.1, 8.5)    | -9.0 (-21.3, 3.2)    | -26.0 (-37.1, -14.9) | -0.9 (-10.0, 8.2)   | -6.3 (-20.8, 8.3)    | -26.4 (-47.0, -5.9)  |
| Fujian                | Quanzhou     | -1.6 (-7.2, 4.1)   | -9.9 (-18.4, -1.5)   | -27.1 (-34.9, -19.3) | -1.6 (-6.5, 3.2)    | -7.9 (-16.0, 0.3)    | -24.7 (-34.4, -15.0) |
| Fujian                | Zhangzhou    | -3.7 (-7.2, -0.2)  | -13.5 (-19.6, -7.4)  | -31.1 (-36.3, -25.9) | -3.9 (-8.0, 0.2)    | -12.6 (-18.3, -6.9)  | -33.1 (-41.0, -25.2) |
| Fujian                | Nanping      | -1.0 (-10.6, 8.7)  | -10.2 (-22.0, 1.5)   | -27.2 (-38.6, -15.8) | -1.8 (-9.7, 6.2)    | -7.8 (-20.7, 5.1)    | -27.4 (-46.9, -7.9)  |
| Fujian                | Longyan      | -2.3 (-6.8, 2.2)   | -10.9 (-18.2, -3.7)  | -28.3 (-34.9, -21.6) | -2.1 (-8.0, 3.8)    | -8.4 (-18.2, 1.4)    | -26.3 (-39.1, -13.4) |
| Fujian                | Ningde       | 5.4 (-8.3, 19.1)   | 1.8 (-13.9, 17.4)    | -13.5 (-29.9, 2.9)   | 7.6 (-6.5, 21.7)    | 10.7 (-9.2, 30.6)    | 6.8 (-20.7, 34.4)    |
| Jiangxi               | Nanchang     | -6.2 (-8.3, -4.1)  | -16.6 (-18.5, -14.7) | -34.2 (-35.7, -32.6) | -6.4 (-8.5, -4.3)   | -16.4 (-18.8, -13.9) | -34.4 (-37.2, -31.7) |
| Jiangxi               | Jingdezhen   | -6.2 (-7.9, -4.5)  | -16.5 (-18.7, -14.3) | -34.1 (-36.0, -32.1) | -6.3 (-8.7, -3.8)   | -16.3 (-19.0, -13.6) | -34.4 (-37.7, -31.1) |
| Jiangxi               | Pingxiang    | -6.0 (-8.1, -4.0)  | -16.0 (-18.7, -13.3) | -33.7 (-35.6, -31.7) | -6.0 (-8.2, -3.8)   | -15.6 (-18.1, -13.1) | -33.7 (-36.7, -30.6) |
| Jiangxi               | Jiujiang     | -1.9 (-8.1, 4.2)   | -9.4 (-15.7, -3.1)   | -26.5 (-33.2, -19.8) | -1.1 (-6.3, 4.1)    | -6.1 (-13.1, 1.0)    | -18.5 (-27.0, -10.0) |
| Jiangxi               | Xinyu        | -6.0 (-8.1, -4.0)  | -16.0 (-18.7, -13.3) | -33.7 (-35.6, -31.7) | -6.0 (-8.2, -3.8)   | -15.6 (-18.1, -13.1) | -33.7 (-36.7, -30.6) |
| Jiangxi               | Yingtan      | -6.3 (-7.9, -4.8)  | -16.8 (-19.1, -14.4) | -34.3 (-36.1, -32.5) | -6.6 (-9.0, -4.2)   | -16.7 (-19.6, -13.8) | -35.2 (-38.7, -31.6) |
| Jiangxi               | Ganzhou      | -6.4 (-8.4, -4.4)  | -16.7 (-18.9, -14.5) | -34.3 (-35.8, -32.8) | -6.6 (-8.7, -4.5)   | -16.6 (-19.0, -14.3) | -35.3 (-38.1, -32.4) |
| Jiangxi               | Ji'an        | -6.2 (-8.3, -4.2)  | -16.4 (-19.1, -13.8) | -34.1 (-36.2, -32.1) | -6.3 (-8.6, -4.0)   | -16.2 (-18.9, -13.5) | -34.6 (-37.8, -31.4) |
| Jiangxi               | Yichun       | -6.0 (-8.0, -4.1)  | -16.0 (-18.7, -13.4) | -33.7 (-35.6, -31.8) | -6.0 (-8.1, -3.9)   | -15.7 (-18.1, -13.3) | -33.7 (-36.6, -30.8) |
| Jiangxi               | Fuzhou       | -6.1 (-7.9, -4.3)  | -16.2 (-18.9, -13.6) | -33.8 (-35.7, -31.9) | -6.2 (-8.4, -4.0)   | -15.9 (-18.3, -13.5) | -34.1 (-37.2, -31.0) |
| Jiangxi               | Shangrao     | -6.3 (-7.9, -4.7)  | -16.6 (-18.9, -14.4) | -34.1 (-35.9, -32.4) | -6.3 (-8.5, -4.0)   | -16.4 (-18.8, -14.0) | -34.5 (-37.5, -31.4) |
| Shandong              | Jinan        | -5.4 (-8.3, -2.4)  | -15.0 (-17.7, -12.3) | -32.4 (-34.9, -29.8) | -4.8 (-7.3, -2.3)   | -13.7 (-16.1, -11.2) | -29.7 (-32.8, -26.5) |
| Shandong              | Qingdao      | -5.4 (-8.0, -2.7)  | -15.0 (-17.6, -12.4) | -32.4 (-35.0, -29.9) | -5.0 (-7.3, -2.8)   | -13.9 (-16.5, -11.3) | -30.0 (-33.0, -27.0) |
| Shandong              | Zibo         | -5.1 (-8.1, -2.1)  | -14.7 (-17.7, -11.7) | -32.1 (-34.8, -29.4) | -4.8 (-7.4, -2.3)   | -13.4 (-16.4, -10.4) | -29.2 (-33.0, -25.4) |
| Shandong              | Zaozhuang    | -5.6 (-8.2, -3.1)  | -15.4 (-17.7, -13.2) | -32.9 (-34.8, -31.0) | -5.4 (-7.5, -3.3)   | -14.4 (-17.0, -11.9) | -30.8 (-33.8, -27.8) |
| Shandong              | Dongying     | -5.2 (-8.0, -2.4)  | -14.9 (-17.6, -12.1) | -32.2 (-34.9, -29.5) | -4.9 (-7.5, -2.3)   | -13.7 (-16.4, -11.0) | -29.6 (-33.1, -26.1) |
| Shandong              | Yantai       | -5.2 (-8.4, -2.1)  | -15.0 (-18.1, -11.9) | -32.4 (-35.1, -29.6) | -4.9 (-7.8, -2.1)   | -13.9 (-16.5, -11.3) | -30.0 (-33.2, -26.9) |
| Shandong              | Weifang      | -5.4 (-8.0, -2.9)  | -15.2 (-17.7, -12.6) | -32.5 (-34.8, -30.1) | -5.1 (-7.4, -2.7)   | -14.1 (-16.7, -11.6) | -30.4 (-33.5, -27.2) |
| Shandong              | Jining       | -5.6 (-8.2, -3.1)  | -15.4 (-17.7, -13.2) | -32.9 (-34.8, -31.0) | -5.4 (-7.5, -3.3)   | -14.4 (-17.0, -11.9) | -30.8 (-33.8, -27.8) |
| Shandong              | Tai'an       | -2.7 (-8.4, 3.0)   | -10.6 (-16.5, -4.8)  | -27.7 (-34.2, -21.3) | -1.6 (-6.4, 3.1)    | -7.3 (-13.8, -0.8)   | -19.0 (-27.1, -10.8) |
| Shandong              | Weihai       | -5.2 (-8.4, -2.1)  | -15.0 (-18.1, -11.9) | -32.4 (-35.1, -29.6) | -4.9 (-7.8, -2.1)   | -13.9 (-16.5, -11.3) | -30.0 (-33.2, -26.9) |
| Shandong              | Rizhao       | -5.5 (-8.5, -2.6)  | -15.1 (-17.9, -12.3) | -32.5 (-35.3, -29.7) | -5.1 (-7.3, -2.9)   | -14.1 (-16.6, -11.5) | -30.1 (-32.8, -27.3) |
| Shandong              | Laiwu        | -5.4 (-8.3, -2.4)  | -15.0 (-17.7, -12.3) | -32.4 (-34.9, -29.8) | -4.8 (-7.3, -2.3)   | -13.7 (-16.1, -11.2) | -29.7 (-32.8, -26.5) |
| Shandong              | Linyi        | -5.4 (-8.5, -2.3)  | -14.9 (-17.7, -12.2) | -32.3 (-34.8, -29.9) | -5.0 (-7.3, -2.6)   | -13.7 (-16.6, -10.8) | -29.6 (-33.1, -26.1) |
| Shandong              | Dezhou       | -5.5 (-8.0, -3.1)  | -15.2 (-17.6, -12.9) | -32.6 (-34.9, -30.3) | -5.1 (-7.5, -2.7)   | -14.0 (-16.6, -11.5) | -30.2 (-33.8, -26.7) |
| Shandong              | Liaocheng    | -5.5 (-8.1, -3.0)  | -15.2 (-17.6, -12.9) | -32.7 (-34.8, -30.6) | -5.3 (-7.4, -3.1)   | -14.2 (-16.6, -11.8) | -30.6 (-33.7, -27.5) |
| Shandong              | Binzhou      | -5.2 (-8.0, -2.4)  | -14.9 (-17.6, -12.1) | -32.2 (-34.9, -29.5) | -4.9 (-7.5, -2.3)   | -13.7 (-16.4, -11.0) | -29.6 (-33.1, -26.1) |
| Shandong              | Heze         | -5.5 (-8.1, -3.0)  | -15.2 (-17.6, -12.9) | -32.7 (-34.8, -30.6) | -5.3 (-7.4, -3.1)   | -14.2 (-16.6, -11.8) | -30.6 (-33.7, -27.5) |
| <b>Central region</b> |              |                    |                      |                      |                     |                      |                      |
| Henan                 | Zhengzhou    | -7.7 (-10.7, -4.7) | -18.5 (-21.7, -15.2) | -35.8 (-38.6, -33.0) | -7.8 (-11.6, -4.0)  | -19.2 (-23.3, -15.0) | -38.7 (-44.2, -33.2) |
| Henan                 | Kaifeng      | -7.6 (-11.0, -4.3) | -18.3 (-21.5, -15.1) | -35.9 (-39.0, -32.7) | -7.3 (-10.7, -3.9)  | -18.8 (-22.7, -15.0) | -38.2 (-43.6, -32.9) |
| Henan                 | Luoyang      | -7.1 (-10.0, -4.1) | -17.3 (-20.1, -14.5) | -34.8 (-37.2, -32.4) | -6.6 (-9.9, -3.4)   | -17.3 (-21.1, -13.5) | -36.0 (-40.2, -31.8) |
| Henan                 | Pingdingshan | -7.9 (-10.7, -5.2) | -18.9 (-22.0, -15.9) | -36.5 (-39.4, -33.5) | -7.9 (-11.3, -4.6)  | -19.9 (-23.7, -16.0) | -40.0 (-45.3, -34.8) |
| Henan                 | Anyang       | -7.2 (-11.0, -3.4) | -17.9 (-21.2, -14.7) | -35.5 (-38.8, -32.2) | -6.9 (-10.6, -3.3)  | -18.1 (-22.1, -14.1) | -37.5 (-42.9, -32.1) |
| Henan                 | Hebi         | -7.2 (-11.0, -3.4) | -17.9 (-21.2, -14.7) | -35.5 (-38.8, -32.2) | -6.9 (-10.6, -3.3)  | -18.1 (-22.1, -14.1) | -37.5 (-42.9, -32.1) |
| Henan                 | Xinxiang     | -7.6 (-10.6, -4.6) | -18.3 (-21.4, -15.1) | -35.7 (-38.7, -32.7) | -7.2 (-10.9, -3.4)  | -18.4 (-22.3, -14.5) | -37.7 (-42.7, -32.6) |
| Henan                 | Jiaozuo      | -7.6 (-10.6, -4.6) | -18.3 (-21.4, -15.1) | -35.7 (-38.7, -32.7) | -7.2 (-10.9, -3.4)  | -18.4 (-22.3, -14.5) | -37.7 (-42.7, -32.6) |
| Henan                 | Puyang       | -6.7 (-10.0, -3.4) | -17.3 (-21.0, -13.5) | -34.8 (-38.0, -31.7) | -7.0 (-10.4, -3.6)  | -17.7 (-21.7, -13.6) | -36.4 (-41.6, -31.3) |
| Henan                 | Xuchang      | -7.8 (-10.4, -5.2) | -18.9 (-22.2, -15.6) | -36.4 (-39.4, -33.4) | -8.0 (-11.4, -4.5)  | -19.7 (-24.2, -15.2) | -39.5 (-45.3, -33.8) |
| Henan                 | Luohe        | -7.5 (-10.4, -4.5) | -18.5 (-21.5, -15.4) | -36.0 (-39.1, -33.0) | -7.6 (-11.1, -4.2)  | -19.3 (-23.3, -15.3) | -39.2 (-44.8, -33.6) |
| Henan                 | Sanmenxia    | -7.6 (-10.3, -4.9) | -18.5 (-21.5, -15.5) | -36.0 (-38.5, -33.5) | -7.7 (-11.4, -4.0)  | -19.3 (-23.5, -15.0) | -39.2 (-44.7, -33.7) |
| Henan                 | Nanyang      | -7.7 (-10.8, -4.6) | -19.0 (-22.3, -15.6) | -36.5 (-40.4, -32.7) | -8.0 (-11.3, -4.6)  | -19.9 (-23.9, -15.9) | -40.1 (-45.2, -34.9) |
| Henan                 | Shangqiu     | -7.6 (-10.6, -4.5) | -18.4 (-21.7, -15.2) | -35.9 (-39.0, -32.8) | -7.5 (-11.0, -4.0)  | -18.8 (-23.0, -14.6) | -38.5 (-43.7, -33.3) |
| Henan                 | Xinyang      | -8.3 (-11.6, -5.0) | -19.7 (-23.9, -15.5) | -37.2 (-41.1, -33.4) | -8.4 (-12.2, -4.5)  | -20.7 (-25.7, -15.8) | -41.6 (-48.4, -34.9) |
| Henan                 | Zhoukou      | -7.5 (-10.4, -4.5) | -18.5 (-21.5, -15.4) | -36.0 (-39.1, -33.0) | -7.6 (-11.1, -4.2)  | -19.3 (-23.3, -15.3) | -39.2 (-44.8, -33.6) |
| Henan                 | Zhumadian    | -8.2 (-12.0, -4.4) | -19.4 (-23.6, -15.2) | -36.8 (-40.8, -32.8) | -8.0 (-12.2, -3.9)  | -20.1 (-25.0, -15.2) | -40.6 (-47.1, -34.0) |
| Henan                 | Jiyuan       | -7.1 (-10.0, -4.1) | -17.3 (-20.1, -14.5) | -34.8 (-37.2, -32.4) | -6.6 (-9.9, -3.4)   | -17.3 (-21.1, -13.5) | -36.0 (-40.2, -31.8) |
| Hubei                 | Wuhan        | -8.9 (-13.3, -4.6) | -21.3 (-26.4, -16.2) | -39.3 (-44.6, -34.0) | -9.5 (-14.6, -4.3)  | -23.3 (-31.3, -15.4) | -46.5 (-55.7, -37.4) |
| Hubei                 | Huangshi     | -9.3 (-13.8, -4.9) | -22.4 (-27.6, -17.2) | -40.3 (-46.5, -34.2) | -10.7 (-15.9, -5.5) | -25.1 (-33.4, -16.9) | -49.1 (-58.9, -39.3) |
| Hubei                 | Shiyan       | -7.8 (-10.9, -4.7) | -19.2 (-22.4, -16.1) | -37.1 (-41.2, -33.0) | -8.2 (-11.8, -4.6)  | -20.5 (-24.6, -16.4) | -41.7 (-47.3, -36.1) |

|              |               |                    |                      |                      |                     |                      |                      |
|--------------|---------------|--------------------|----------------------|----------------------|---------------------|----------------------|----------------------|
| Hubei        | Yichang       | -9.5 (-14.3, -4.7) | -21.9 (-26.8, -17.1) | -40.0 (-46.2, -33.9) | -10.4 (-15.0, -5.9) | -24.7 (-31.1, -18.3) | -48.6 (-56.8, -40.4) |
| Hubei        | Xiangyang     | -8.7 (-12.4, -5.0) | -20.4 (-24.7, -16.2) | -38.4 (-43.9, -32.9) | -9.2 (-13.6, -4.8)  | -22.4 (-28.3, -16.5) | -44.3 (-51.6, -37.0) |
| Hubei        | Ezhou         | -9.3 (-13.8, -4.9) | -22.4 (-27.6, -17.2) | -40.3 (-46.5, -34.2) | -10.7 (-15.9, -5.5) | -25.1 (-33.4, -16.9) | -49.1 (-58.9, -39.3) |
| Hubei        | Jingmen       | -9.1 (-13.4, -4.7) | -21.2 (-25.7, -16.6) | -39.1 (-44.8, -33.5) | -9.6 (-14.1, -5.1)  | -23.3 (-29.6, -17.1) | -46.3 (-53.7, -39.0) |
| Hubei        | Xiaogan       | -9.1 (-13.8, -4.4) | -21.6 (-27.0, -16.1) | -39.6 (-45.3, -33.9) | -9.6 (-15.2, -4.1)  | -23.7 (-32.2, -15.2) | -47.3 (-57.1, -37.6) |
| Hubei        | Jingzhou      | -8.8 (-13.8, -3.8) | -21.0 (-25.8, -16.3) | -39.2 (-44.2, -34.1) | -9.4 (-13.1, -5.7)  | -22.9 (-27.9, -17.9) | -46.4 (-52.8, -40.0) |
| Hubei        | Huanggang     | -9.3 (-13.8, -4.9) | -22.4 (-27.6, -17.2) | -40.3 (-46.5, -34.2) | -10.7 (-15.9, -5.5) | -25.1 (-33.4, -16.9) | -49.1 (-58.9, -39.3) |
| Hubei        | Xianning      | -9.5 (-14.1, -5.0) | -22.4 (-27.8, -17.0) | -40.4 (-46.5, -34.2) | -10.2 (-15.7, -4.7) | -24.8 (-33.2, -16.4) | -48.9 (-58.5, -39.2) |
| Hubei        | Suizhou       | -8.5 (-11.8, -5.2) | -20.3 (-24.1, -16.6) | -38.1 (-43.1, -33.2) | -9.1 (-13.5, -4.6)  | -22.0 (-27.6, -16.3) | -43.8 (-50.6, -37.0) |
| Hubei        | Enshi         | -9.3 (-13.3, -5.3) | -21.7 (-26.0, -17.4) | -39.7 (-43.9, -35.5) | -10.3 (-13.7, -6.8) | -23.9 (-29.4, -18.3) | -47.5 (-55.3, -39.8) |
| Hubei        | Xiantao       | -8.9 (-13.6, -4.1) | -20.9 (-25.8, -16.1) | -39.2 (-44.0, -34.4) | -9.4 (-13.3, -5.5)  | -22.8 (-27.9, -17.7) | -46.1 (-52.2, -40.0) |
| Hubei        | Qianjiang     | -8.9 (-13.6, -4.1) | -20.9 (-25.8, -16.1) | -39.2 (-44.0, -34.4) | -9.4 (-13.3, -5.5)  | -22.8 (-27.9, -17.7) | -46.1 (-52.2, -40.0) |
| Hubei        | Tianmen       | -8.9 (-13.7, -4.0) | -21.0 (-25.9, -16.0) | -39.3 (-44.2, -34.4) | -9.4 (-13.4, -5.5)  | -22.9 (-28.1, -17.7) | -46.3 (-52.5, -40.1) |
| Hubei        | Shennongjia   | -8.0 (-11.7, -4.3) | -19.6 (-23.3, -15.9) | -37.6 (-42.4, -32.7) | -8.5 (-12.8, -4.2)  | -21.1 (-26.0, -16.3) | -43.1 (-49.7, -36.4) |
| Hunan        | Zhangsha      | -6.6 (-9.9, -3.3)  | -17.2 (-20.3, -14.2) | -35.1 (-37.5, -32.6) | -6.8 (-8.9, -4.7)   | -17.6 (-20.0, -15.1) | -36.8 (-39.6, -34.0) |
| Hunan        | Chuzhou       | -4.7 (-7.7, -1.8)  | -13.9 (-17.5, -10.3) | -31.3 (-34.1, -28.6) | -4.2 (-7.2, -1.1)   | -12.4 (-15.9, -8.9)  | -28.5 (-33.2, -23.8) |
| Hunan        | Xiangtan      | -4.7 (-7.7, -1.8)  | -13.9 (-17.5, -10.3) | -31.3 (-34.1, -28.6) | -4.2 (-7.2, -1.1)   | -12.4 (-15.9, -8.9)  | -28.5 (-33.2, -23.8) |
| Hunan        | Hengyang      | -7.1 (-10.0, -4.2) | -18.0 (-21.1, -14.9) | -35.7 (-38.2, -33.3) | -7.3 (-9.9, -4.7)   | -18.6 (-21.7, -15.5) | -38.4 (-41.8, -35.0) |
| Hunan        | Shaoyang      | -6.8 (-9.3, -4.3)  | -17.4 (-20.1, -14.7) | -35.2 (-37.3, -33.1) | -7.0 (-9.2, -4.8)   | -17.7 (-20.6, -14.9) | -36.8 (-39.8, -33.8) |
| Hunan        | Yueyang       | -6.9 (-10.0, -3.8) | -17.5 (-20.1, -15.0) | -35.4 (-37.5, -33.2) | -7.0 (-8.8, -5.3)   | -17.8 (-19.9, -15.7) | -36.9 (-39.3, -34.4) |
| Hunan        | Changde       | -6.9 (-9.9, -3.8)  | -17.5 (-20.2, -14.8) | -35.3 (-37.5, -33.1) | -6.9 (-8.9, -5.0)   | -17.9 (-20.3, -15.5) | -36.9 (-39.8, -34.0) |
| Hunan        | Zhangjiajie   | -7.0 (-9.5, -4.5)  | -17.5 (-19.8, -15.2) | -35.2 (-37.1, -33.4) | -7.0 (-9.1, -4.9)   | -17.8 (-20.4, -15.1) | -36.8 (-39.7, -33.9) |
| Hunan        | Yiyang        | -6.8 (-9.9, -3.8)  | -17.4 (-20.2, -14.6) | -35.2 (-37.5, -33.0) | -7.0 (-9.0, -4.9)   | -17.8 (-20.2, -15.4) | -36.9 (-39.8, -34.0) |
| Hunan        | Chenzhou      | -7.3 (-10.3, -4.3) | -18.2 (-21.3, -15.1) | -36.1 (-38.8, -33.4) | -7.7 (-10.2, -5.1)  | -18.9 (-22.4, -15.4) | -39.1 (-43.3, -34.9) |
| Hunan        | Yongzhou      | -7.2 (-9.6, -4.8)  | -18.0 (-20.5, -15.4) | -35.7 (-37.8, -33.5) | -7.4 (-9.7, -5.0)   | -18.5 (-21.5, -15.5) | -38.0 (-41.4, -34.6) |
| Hunan        | Huaihua       | -6.8 (-9.2, -4.3)  | -17.2 (-20.1, -14.2) | -35.0 (-36.7, -33.3) | -6.9 (-9.1, -4.7)   | -17.5 (-20.5, -14.4) | -36.3 (-39.9, -32.8) |
| Hunan        | Loudi         | -6.9 (-9.8, -4.0)  | -17.4 (-20.6, -14.3) | -35.3 (-37.6, -33.0) | -7.0 (-9.2, -4.8)   | -17.7 (-20.7, -14.8) | -37.0 (-40.2, -33.9) |
| Hunan        | Xiangxi       | -6.8 (-9.1, -4.5)  | -17.5 (-19.8, -15.2) | -35.2 (-37.1, -33.2) | -7.0 (-9.2, -4.9)   | -17.8 (-20.6, -15.0) | -36.9 (-40.1, -33.7) |
| <b>South</b> |               |                    |                      |                      |                     |                      |                      |
| Guangdong    | Guangzhou     | -3.4 (-7.4, 0.6)   | -12.2 (-16.8, -7.6)  | -29.2 (-33.6, -24.8) | -3.0 (-6.7, 0.7)    | -9.8 (-15.8, -3.9)   | -25.3 (-32.1, -18.5) |
| Guangdong    | Shaoguan      | -3.4 (-7.3, 0.5)   | -12.1 (-17.1, -7.2)  | -29.3 (-34.0, -24.6) | -3.0 (-6.8, 0.8)    | -9.9 (-16.5, -3.3)   | -25.0 (-33.1, -17.0) |
| Guangdong    | Shenzhen      | -3.3 (-6.9, 0.2)   | -12.2 (-16.6, -7.8)  | -29.4 (-33.5, -25.3) | -2.8 (-6.5, 0.9)    | -9.9 (-15.7, -4.1)   | -26.3 (-32.7, -20.0) |
| Guangdong    | Zhuhai        | -3.3 (-6.9, 0.2)   | -12.2 (-16.6, -7.8)  | -29.4 (-33.5, -25.3) | -2.8 (-6.5, 0.9)    | -9.9 (-15.7, -4.1)   | -26.3 (-32.7, -20.0) |
| Guangdong    | Shantou       | -2.3 (-6.3, 1.8)   | -10.9 (-15.8, -6.1)  | -28.0 (-33.0, -22.9) | -2.2 (-6.6, 2.3)    | -8.4 (-15.0, -1.9)   | -23.8 (-31.3, -16.2) |
| Guangdong    | Foshan        | -3.4 (-7.4, 0.6)   | -12.2 (-16.8, -7.6)  | -29.2 (-33.6, -24.8) | -3.0 (-6.7, 0.7)    | -9.8 (-15.8, -3.9)   | -25.3 (-32.1, -18.5) |
| Guangdong    | Jiangmen      | -2.8 (-7.5, 2.0)   | -11.1 (-18.0, -4.1)  | -28.0 (-34.4, -21.6) | -2.1 (-7.0, 2.8)    | -8.2 (-15.6, -0.7)   | -24.4 (-30.4, -18.4) |
| Guangdong    | Zhanjiang     | -3.6 (-8.4, 1.3)   | -12.5 (-18.6, -6.3)  | -29.7 (-35.2, -24.3) | -3.5 (-7.8, 0.8)    | -10.6 (-17.0, -4.3)  | -27.5 (-32.9, -22.1) |
| Guangdong    | Maoming       | -3.4 (-7.5, 0.7)   | -12.0 (-17.7, -6.3)  | -29.2 (-34.5, -23.9) | -3.2 (-7.5, 1.1)    | -10.0 (-16.4, -3.5)  | -26.0 (-31.8, -20.2) |
| Guangdong    | Zhaoqing      | -3.6 (-7.5, 0.3)   | -12.4 (-17.3, -7.5)  | -29.6 (-33.9, -25.2) | -3.0 (-6.4, 0.4)    | -10.1 (-16.0, -4.2)  | -25.6 (-32.2, -19.0) |
| Guangdong    | Huizhou       | -3.2 (-7.0, 0.7)   | -11.9 (-16.5, -7.3)  | -29.0 (-33.5, -24.5) | -2.7 (-6.7, 1.4)    | -9.4 (-15.9, -2.8)   | -25.2 (-32.2, -18.1) |
| Guangdong    | Meizhou       | -3.1 (-6.5, 0.3)   | -11.9 (-16.5, -7.3)  | -29.0 (-33.4, -24.6) | -2.9 (-7.3, 1.5)    | -9.4 (-16.5, -2.4)   | -25.2 (-33.1, -17.2) |
| Guangdong    | Shanwei       | -3.0 (-6.9, 1.0)   | -11.7 (-16.2, -7.1)  | -28.8 (-33.3, -24.2) | -2.5 (-6.6, 1.6)    | -9.2 (-15.1, -3.3)   | -24.7 (-31.4, -18.0) |
| Guangdong    | Heyuan        | -3.0 (-6.8, 0.8)   | -11.7 (-16.2, -7.2)  | -28.8 (-33.4, -24.3) | -2.7 (-6.9, 1.6)    | -9.4 (-16.0, -2.7)   | -25.0 (-32.5, -17.4) |
| Guangdong    | Yangjiang     | -2.9 (-7.6, 1.8)   | -11.1 (-18.2, -4.1)  | -28.2 (-34.5, -22.0) | -2.4 (-7.0, 2.3)    | -8.5 (-15.8, -1.2)   | -24.7 (-30.3, -19.1) |
| Guangdong    | Qingyuan      | -2.9 (-6.9, 1.0)   | -11.4 (-16.1, -6.7)  | -28.4 (-33.0, -23.8) | -2.5 (-6.5, 1.4)    | -8.7 (-15.2, -2.2)   | -23.3 (-31.0, -15.6) |
| Guangdong    | Dongguan      | -3.0 (-7.1, 1.1)   | -11.6 (-16.4, -6.8)  | -28.7 (-33.2, -24.1) | -2.6 (-6.4, 1.2)    | -9.0 (-15.3, -2.8)   | -24.2 (-31.0, -17.4) |
| Guangdong    | Zhongshan     | -2.8 (-7.5, 2.0)   | -11.1 (-18.0, -4.1)  | -28.0 (-34.4, -21.6) | -2.1 (-7.0, 2.8)    | -8.2 (-15.6, -0.7)   | -24.4 (-30.4, -18.4) |
| Guangdong    | Chaozhou      | -2.3 (-6.3, 1.8)   | -10.9 (-15.8, -6.1)  | -28.0 (-33.0, -22.9) | -2.2 (-6.6, 2.3)    | -8.4 (-15.0, -1.9)   | -23.8 (-31.3, -16.2) |
| Guangdong    | Jieyang       | -2.3 (-6.3, 1.8)   | -10.9 (-15.8, -6.1)  | -28.0 (-33.0, -22.9) | -2.2 (-6.6, 2.3)    | -8.4 (-15.0, -1.9)   | -23.8 (-31.3, -16.2) |
| Guangdong    | Yunfu         | -3.6 (-7.5, 0.3)   | -12.4 (-17.3, -7.5)  | -29.6 (-33.9, -25.2) | -3.0 (-6.4, 0.4)    | -10.1 (-16.0, -4.2)  | -25.6 (-32.2, -19.0) |
| Guangxi      | Nanning       | -5.4 (-8.8, -2.0)  | -14.9 (-19.4, -10.5) | -32.4 (-35.5, -29.4) | -5.3 (-8.2, -2.5)   | -14.5 (-19.2, -9.7)  | -32.4 (-38.5, -26.4) |
| Guangxi      | Liuzhou       | -5.5 (-7.9, -3.2)  | -15.3 (-18.5, -12.1) | -32.7 (-35.6, -29.7) | -5.5 (-8.7, -2.4)   | -14.7 (-19.7, -9.7)  | -32.9 (-40.1, -25.8) |
| Guangxi      | Guilin        | -5.2 (-7.7, -2.7)  | -14.6 (-18.9, -10.3) | -32.1 (-34.8, -29.5) | -4.7 (-7.5, -1.8)   | -13.6 (-18.5, -8.7)  | -31.2 (-38.3, -24.1) |
| Guangxi      | Wuzhou        | -4.9 (-8.4, -1.3)  | -14.5 (-19.3, -9.6)  | -31.9 (-35.4, -28.5) | -4.6 (-7.9, -1.3)   | -13.4 (-19.1, -7.6)  | -31.4 (-38.4, -24.3) |
| Guangxi      | Beihai        | -5.2 (-9.1, -1.3)  | -14.8 (-19.8, -9.8)  | -32.4 (-36.3, -28.5) | -5.1 (-8.5, -1.6)   | -14.1 (-18.7, -9.5)  | -33.5 (-39.6, -27.4) |
| Guangxi      | Fangchenggang | -5.1 (-8.7, -1.6)  | -14.5 (-19.1, -9.9)  | -31.9 (-35.5, -28.3) | -5.2 (-8.1, -2.2)   | -13.6 (-17.9, -9.4)  | -31.8 (-38.4, -25.1) |
| Guangxi      | Qinzhou       | -4.9 (-8.8, -1.0)  | -14.3 (-19.5, -9.2)  | -31.7 (-35.6, -27.9) | -4.7 (-8.2, -1.3)   | -13.4 (-18.5, -8.3)  | -32.0 (-37.5, -26.5) |
| Guangxi      | Guigang       | -5.4 (-8.1, -2.7)  | -15.1 (-19.1, -11.0) | -32.3 (-35.5, -29.1) | -5.3 (-8.0, -2.6)   | -14.2 (-19.2, -9.3)  | -31.9 (-39.0, -24.8) |
| Guangxi      | Yulin         | -5.0 (-8.1, -1.9)  | -14.5 (-18.5, -10.5) | -31.8 (-35.2, -28.4) | -4.8 (-8.0, -1.6)   | -13.4 (-18.3, -8.5)  | -30.9 (-37.2, -24.5) |
| Guangxi      | Baise         | -6.0 (-9.2, -2.7)  | -15.8 (-20.0, -11.7) | -33.5 (-36.6, -30.5) | -5.9 (-8.6, -3.2)   | -15.6 (-19.9, -11.3) | -34.6 (-41.0, -28.2) |

|                  |             |                     |                      |                      |                     |                      |                      |
|------------------|-------------|---------------------|----------------------|----------------------|---------------------|----------------------|----------------------|
| Guangxi          | Hezhou      | -5.1 (-8.5, -1.7)   | -14.7 (-19.4, -10.1) | -32.1 (-35.5, -28.8) | -4.7 (-8.2, -1.3)   | -13.7 (-19.4, -7.9)  | -31.4 (-38.7, -24.1) |
| Guangxi          | Hechi       | -5.2 (-8.5, -1.8)   | -14.8 (-18.9, -10.7) | -32.4 (-35.5, -29.3) | -5.2 (-8.1, -2.3)   | -14.5 (-19.2, -9.8)  | -32.5 (-39.3, -25.7) |
| Guangxi          | Laibin      | -5.2 (-7.9, -2.5)   | -14.6 (-18.6, -10.7) | -32.0 (-35.2, -28.9) | -5.1 (-8.3, -1.9)   | -13.8 (-18.8, -8.9)  | -31.6 (-39.0, -24.1) |
| Guangxi          | Chongzuo    | -5.3 (-8.3, -2.2)   | -14.7 (-19.2, -10.1) | -32.3 (-35.7, -28.8) | -5.4 (-7.9, -3.0)   | -14.4 (-18.5, -10.3) | -32.3 (-37.4, -27.1) |
| Hainan           | Haikou      | -7.5 (-11.1, -4.0)  | -19.8 (-25.9, -13.7) | -38.1 (-45.2, -31.0) | -8.9 (-12.3, -5.6)  | -22.3 (-29.2, -15.5) | -47.8 (-60.1, -35.6) |
| Hainan           | Sanya       | -8.9 (-12.3, -5.4)  | -21.4 (-26.8, -16.1) | -39.9 (-47.0, -32.9) | -9.5 (-12.8, -6.2)  | -24.2 (-32.3, -16.2) | -50.9 (-67.4, -34.3) |
| Hainan           | Wuzhishan   | -5.9 (-9.3, -2.5)   | -16.9 (-21.1, -12.7) | -35.1 (-40.3, -29.9) | -6.3 (-9.6, -3.1)   | -18.0 (-23.5, -12.4) | -43.0 (-57.4, -28.5) |
| Hainan           | Qionghai    | -8.0 (-11.3, -4.6)  | -20.2 (-24.9, -15.5) | -38.5 (-44.8, -32.1) | -8.8 (-12.1, -5.6)  | -22.5 (-29.0, -16.1) | -48.8 (-63.4, -34.2) |
| Hainan           | Danzhou     | -7.7 (-11.3, -4.0)  | -19.6 (-24.8, -14.5) | -37.9 (-44.7, -31.0) | -8.3 (-11.1, -5.5)  | -21.5 (-28.6, -14.3) | -46.9 (-62.9, -30.8) |
| Hainan           | Wenchang    | -8.0 (-11.3, -4.6)  | -20.2 (-24.9, -15.5) | -38.5 (-44.8, -32.1) | -8.8 (-12.1, -5.6)  | -22.5 (-29.0, -16.1) | -48.8 (-63.4, -34.2) |
| Hainan           | Wanning     | -8.0 (-11.4, -4.5)  | -20.3 (-25.1, -15.5) | -38.6 (-45.0, -32.1) | -8.9 (-12.2, -5.6)  | -22.6 (-29.2, -16.0) | -49.1 (-63.9, -34.2) |
| Hainan           | Dongfang    | -7.9 (-12.0, -3.7)  | -20.3 (-26.1, -14.6) | -38.6 (-46.3, -31.0) | -8.9 (-11.6, -6.2)  | -22.8 (-30.8, -14.9) | -48.9 (-67.0, -30.8) |
| Hainan           | Ding'an     | -7.5 (-11.2, -3.9)  | -19.9 (-26.1, -13.7) | -38.1 (-45.4, -30.9) | -9.0 (-12.4, -5.6)  | -22.4 (-29.4, -15.4) | -48.1 (-60.7, -35.6) |
| Hainan           | Tunchang    | -8.1 (-11.8, -4.4)  | -20.5 (-25.7, -15.3) | -38.8 (-45.8, -31.9) | -9.0 (-12.6, -5.5)  | -23.0 (-30.1, -15.9) | -50.1 (-66.1, -34.2) |
| Hainan           | Chengmai    | -7.5 (-11.1, -4.0)  | -19.8 (-25.9, -13.7) | -38.1 (-45.2, -31.0) | -8.9 (-12.3, -5.6)  | -22.3 (-29.2, -15.5) | -47.8 (-60.1, -35.6) |
| Hainan           | Lingao      | -7.7 (-11.6, -3.8)  | -19.8 (-25.2, -14.4) | -38.0 (-45.3, -30.8) | -8.4 (-11.4, -5.4)  | -21.7 (-29.2, -14.2) | -47.5 (-64.5, -30.6) |
| Hainan           | Baisha      | -7.7 (-11.4, -3.9)  | -19.7 (-24.9, -14.4) | -37.9 (-44.9, -30.9) | -8.3 (-11.2, -5.4)  | -21.6 (-28.8, -14.3) | -47.1 (-63.5, -30.7) |
| Hainan           | Changjiang  | -7.9 (-12.0, -3.7)  | -20.3 (-26.1, -14.6) | -38.6 (-46.3, -31.0) | -8.9 (-11.6, -6.2)  | -22.8 (-30.8, -14.9) | -48.9 (-67.0, -30.8) |
| Hainan           | Ledong      | -8.9 (-12.3, -5.4)  | -21.4 (-26.8, -16.1) | -39.9 (-47.0, -32.9) | -9.5 (-12.8, -6.2)  | -24.2 (-32.3, -16.2) | -50.9 (-67.4, -34.3) |
| Hainan           | Lingshui    | -8.3 (-11.9, -4.8)  | -20.5 (-25.8, -15.3) | -39.1 (-45.3, -32.8) | -8.8 (-12.2, -5.4)  | -22.9 (-30.2, -15.5) | -50.9 (-67.6, -34.3) |
| Hainan           | Baoting     | -8.4 (-12.2, -4.6)  | -20.7 (-26.3, -15.1) | -39.3 (-45.9, -32.7) | -8.9 (-12.6, -5.3)  | -23.2 (-31.0, -15.4) | -51.9 (-69.5, -34.2) |
| Hainan           | Qiongzong   | -5.9 (-9.3, -2.5)   | -16.9 (-21.1, -12.7) | -35.1 (-40.3, -29.9) | -6.3 (-9.6, -3.1)   | -18.0 (-23.5, -12.4) | -43.0 (-57.4, -28.5) |
| <b>Southwest</b> |             |                     |                      |                      |                     |                      |                      |
| Chongqing        | Chongqing   | -6.6 (-9.2, -3.9)   | -16.9 (-19.4, -14.5) | -34.7 (-36.6, -32.7) | -6.5 (-8.2, -4.8)   | -16.9 (-19.2, -14.6) | -35.7 (-38.5, -33.0) |
| Sichuan          | Chengdu     | -6.8 (-9.3, -4.3)   | -16.9 (-19.2, -14.5) | -34.8 (-37.0, -32.6) | -6.6 (-9.0, -4.2)   | -17.0 (-19.6, -14.5) | -36.2 (-40.3, -32.2) |
| Sichuan          | Zigong      | -7.8 (-11.8, -3.7)  | -18.8 (-23.0, -14.6) | -37.0 (-40.8, -33.2) | -8.1 (-11.3, -4.9)  | -20.0 (-24.5, -15.5) | -41.9 (-48.7, -35.0) |
| Sichuan          | Panzhihua   | -12.7 (-18.4, -7.1) | -26.5 (-32.2, -20.9) | -45.8 (-52.9, -38.6) | -14.1 (-18.5, -9.7) | -32.0 (-39.8, -24.2) | -62.4 (-76.0, -48.8) |
| Sichuan          | Luzhou      | -8.4 (-13.0, -3.7)  | -20.1 (-25.0, -15.3) | -38.1 (-42.2, -33.9) | -9.1 (-13.4, -4.7)  | -21.7 (-26.9, -16.6) | -44.6 (-53.1, -36.2) |
| Sichuan          | Deyang      | -7.3 (-10.4, -4.2)  | -17.7 (-20.9, -14.6) | -35.7 (-38.5, -32.9) | -7.1 (-9.4, -4.8)   | -18.2 (-21.1, -15.3) | -38.2 (-42.6, -33.9) |
| Sichuan          | Mianyang    | -7.3 (-10.4, -4.2)  | -17.7 (-20.9, -14.6) | -35.7 (-38.5, -32.9) | -7.1 (-9.4, -4.8)   | -18.2 (-21.1, -15.3) | -38.2 (-42.6, -33.9) |
| Sichuan          | Guangyuan   | -7.0 (-9.8, -4.1)   | -17.6 (-20.3, -14.8) | -35.3 (-38.1, -32.6) | -7.1 (-10.0, -4.2)  | -18.1 (-21.7, -14.4) | -38.3 (-43.0, -33.5) |
| Sichuan          | Suining     | -7.4 (-10.9, -3.9)  | -18.3 (-22.1, -14.5) | -36.5 (-40.4, -32.5) | -7.9 (-10.9, -4.8)  | -19.5 (-23.5, -15.5) | -40.4 (-45.9, -34.9) |
| Sichuan          | Neijiang    | -7.6 (-11.1, -4.1)  | -18.6 (-22.2, -15.0) | -36.7 (-40.0, -33.4) | -7.9 (-10.7, -5.1)  | -19.6 (-23.5, -15.8) | -40.9 (-46.8, -35.0) |
| Sichuan          | Leshan      | -7.5 (-10.1, -4.9)  | -18.2 (-20.9, -15.5) | -36.2 (-38.8, -33.6) | -7.7 (-10.7, -4.7)  | -19.0 (-22.6, -15.3) | -39.9 (-45.6, -34.3) |
| Sichuan          | Nanchong    | -7.7 (-11.7, -3.8)  | -18.8 (-23.1, -14.5) | -36.9 (-40.9, -32.9) | -8.2 (-11.4, -4.9)  | -20.1 (-24.2, -16.1) | -41.2 (-46.7, -35.6) |
| Sichuan          | Meishan     | -7.5 (-10.2, -4.8)  | -18.2 (-21.0, -15.5) | -36.3 (-38.9, -33.6) | -7.7 (-10.8, -4.6)  | -19.0 (-22.8, -15.3) | -40.1 (-45.9, -34.2) |
| Sichuan          | Yibin       | -7.9 (-12.6, -3.2)  | -19.1 (-23.9, -14.2) | -37.4 (-41.7, -33.0) | -8.3 (-12.0, -4.6)  | -20.4 (-25.6, -15.3) | -43.0 (-50.9, -35.1) |
| Sichuan          | Guibian     | -7.7 (-11.7, -3.8)  | -18.8 (-23.1, -14.5) | -36.9 (-40.9, -32.9) | -8.2 (-11.4, -4.9)  | -20.1 (-24.2, -16.1) | -41.2 (-46.7, -35.6) |
| Sichuan          | Dazhou      | -7.7 (-11.0, -4.4)  | -18.7 (-22.5, -14.9) | -36.8 (-40.4, -33.3) | -8.1 (-11.4, -4.8)  | -20.1 (-24.1, -16.0) | -41.5 (-47.0, -36.0) |
| Sichuan          | Ya'an       | -7.0 (-9.8, -4.3)   | -17.5 (-20.1, -15.0) | -35.5 (-37.8, -33.1) | -7.2 (-9.8, -4.6)   | -18.0 (-20.8, -15.2) | -37.9 (-42.3, -33.5) |
| Sichuan          | Bazhong     | -7.4 (-10.3, -4.6)  | -18.3 (-21.5, -15.1) | -36.2 (-39.2, -33.2) | -7.7 (-10.4, -5.1)  | -19.2 (-22.8, -15.7) | -39.8 (-44.8, -34.9) |
| Sichuan          | Ziyang      | -7.5 (-11.2, -3.7)  | -18.4 (-22.5, -14.3) | -36.6 (-40.8, -32.4) | -7.9 (-11.2, -4.7)  | -19.7 (-24.0, -15.3) | -40.8 (-46.7, -34.9) |
| Sichuan          | Aba         | -4.5 (-7.3, -1.7)   | -14.0 (-17.0, -11.0) | -31.5 (-34.1, -29.0) | -4.0 (-6.7, -1.3)   | -12.4 (-15.4, -9.5)  | -28.7 (-32.3, -25.0) |
| Sichuan          | Garze       | -2.8 (-6.8, 1.2)    | -11.2 (-15.4, -7.0)  | -28.5 (-32.8, -24.2) | -1.9 (-5.5, 1.8)    | -8.3 (-12.6, -3.9)   | -21.4 (-26.3, -16.4) |
| Sichuan          | Liangshan   | -8.1 (-10.2, -6.1)  | -19.4 (-21.4, -17.4) | -37.4 (-39.5, -35.2) | -8.3 (-10.2, -6.4)  | -20.6 (-23.1, -18.0) | -43.2 (-48.8, -37.6) |
| Guizhou          | Guiyang     | -8.1 (-11.7, -4.4)  | -20.0 (-23.5, -16.5) | -38.0 (-41.3, -34.8) | -8.9 (-12.0, -5.8)  | -21.7 (-26.5, -16.9) | -44.1 (-51.5, -36.7) |
| Guizhou          | Liupanshui  | -6.3 (-8.8, -3.8)   | -16.7 (-19.3, -14.1) | -34.4 (-36.8, -31.9) | -6.4 (-8.4, -4.5)   | -16.5 (-18.6, -14.4) | -35.9 (-39.2, -32.6) |
| Guizhou          | Zunyi       | -8.3 (-12.8, -3.8)  | -20.4 (-24.8, -15.9) | -38.6 (-42.6, -34.5) | -9.1 (-13.0, -5.2)  | -22.1 (-27.4, -16.7) | -45.0 (-53.6, -36.3) |
| Guizhou          | Anshun      | -7.8 (-10.2, -5.3)  | -19.0 (-21.9, -16.1) | -36.9 (-39.7, -34.2) | -8.2 (-11.2, -5.3)  | -20.2 (-24.2, -16.2) | -41.6 (-48.0, -35.2) |
| Guizhou          | Bijie       | -7.3 (-10.6, -4.0)  | -18.2 (-21.7, -14.6) | -36.0 (-38.6, -33.5) | -7.5 (-10.4, -4.6)  | -18.9 (-22.4, -15.5) | -39.6 (-45.1, -34.1) |
| Guizhou          | Tongren     | -9.3 (-15.7, -2.9)  | -22.5 (-28.7, -16.2) | -40.9 (-46.9, -35.0) | -10.8 (-15.8, -5.7) | -25.4 (-32.7, -18.1) | -50.5 (-59.8, -41.2) |
| Guizhou          | Qianxinan   | -9.6 (-13.4, -5.8)  | -21.7 (-26.1, -17.2) | -39.9 (-44.3, -35.5) | -10.3 (-14.5, -6.0) | -24.0 (-30.2, -17.9) | -49.2 (-60.5, -37.8) |
| Guizhou          | Qiandongnan | -8.8 (-12.6, -5.0)  | -20.7 (-24.0, -17.4) | -39.0 (-42.3, -35.7) | -9.4 (-12.7, -6.0)  | -22.6 (-27.8, -17.4) | -45.4 (-52.7, -38.1) |
| Guizhou          | Qiannan     | -8.1 (-11.2, -5.1)  | -19.6 (-22.8, -16.5) | -37.6 (-40.6, -34.7) | -8.6 (-11.6, -5.6)  | -21.0 (-25.4, -16.7) | -42.9 (-49.4, -36.3) |
| Yunnan           | Kunming     | -3.1 (-7.0, 0.7)    | -11.8 (-16.3, -7.3)  | -28.8 (-33.2, -24.4) | -2.5 (-6.2, 1.2)    | -9.3 (-13.8, -4.8)   | -23.5 (-29.5, -17.5) |
| Yunnan           | Qujing      | -4.2 (-8.1, -0.2)   | -13.2 (-17.7, -8.7)  | -30.5 (-34.8, -26.2) | -4.0 (-6.7, -1.2)   | -11.8 (-15.8, -7.8)  | -26.9 (-31.7, -22.0) |
| Yunnan           | Yuxi        | -4.2 (-7.7, -0.6)   | -13.3 (-17.3, -9.2)  | -30.5 (-34.6, -26.4) | -3.8 (-7.1, -0.5)   | -11.5 (-15.4, -7.6)  | -27.0 (-31.6, -22.3) |
| Yunnan           | Baoshan     | -3.4 (-7.5, 0.7)    | -12.1 (-17.1, -7.1)  | -29.2 (-34.4, -24.0) | -2.6 (-6.5, 1.2)    | -9.6 (-14.6, -4.5)   | -23.5 (-30.8, -16.3) |
| Yunnan           | Zhaotong    | -2.6 (-7.5, 2.2)    | -10.9 (-15.7, -6.0)  | -28.0 (-33.0, -22.9) | -2.0 (-5.4, 1.5)    | -8.1 (-13.5, -2.7)   | -21.0 (-28.5, -13.4) |
| Yunnan           | Lijiang     | -2.2 (-6.0, 1.6)    | -10.4 (-14.8, -6.0)  | -27.0 (-32.1, -21.8) | -1.1 (-4.0, 1.7)    | -6.6 (-11.2, -2.0)   | -18.4 (-25.1, -11.6) |

|                  |               |                    |                      |                      |                    |                      |                      |
|------------------|---------------|--------------------|----------------------|----------------------|--------------------|----------------------|----------------------|
| Yunnan           | Pu'er         | -5.4 (-8.8, -2.0)  | -15.0 (-19.0, -11.0) | -32.4 (-35.8, -29.0) | -4.9 (-8.1, -1.7)  | -13.8 (-16.9, -10.6) | -31.0 (-33.7, -28.2) |
| Yunnan           | Lincang       | -4.9 (-8.0, -1.9)  | -14.5 (-18.0, -10.9) | -31.8 (-35.1, -28.6) | -4.6 (-7.7, -1.4)  | -13.1 (-16.5, -9.7)  | -29.4 (-33.4, -25.4) |
| Yunnan           | Chuxiong      | -3.6 (-7.3, 0.0)   | -12.7 (-17.2, -8.2)  | -29.8 (-34.3, -25.3) | -3.1 (-7.9, 1.7)   | -10.4 (-15.6, -5.2)  | -25.3 (-31.9, -18.7) |
| Yunnan           | Honghe        | -5.7 (-8.6, -2.7)  | -15.5 (-19.0, -11.9) | -33.0 (-35.8, -30.2) | -5.6 (-8.0, -3.2)  | -14.8 (-17.6, -11.9) | -32.4 (-35.1, -29.7) |
| Yunnan           | Wenshan       | -4.3 (-8.2, -0.3)  | -13.3 (-18.3, -8.3)  | -30.6 (-35.0, -26.2) | -4.0 (-7.0, -1.0)  | -11.8 (-16.0, -7.6)  | -27.3 (-31.9, -22.7) |
| Yunnan           | Xishuangbanna | -8.0 (-9.7, -6.3)  | -19.0 (-20.9, -17.0) | -36.8 (-39.0, -34.5) | -8.0 (-9.8, -6.2)  | -19.8 (-22.5, -17.1) | -40.7 (-45.4, -36.0) |
| Yunnan           | Dali          | -3.5 (-6.6, -0.5)  | -12.2 (-16.4, -8.1)  | -29.4 (-33.7, -25.1) | -2.9 (-5.6, -0.2)  | -9.9 (-14.1, -5.8)   | -23.8 (-29.8, -17.8) |
| Yunnan           | Dehong        | -3.0 (-7.0, 1.0)   | -11.4 (-16.4, -6.4)  | -28.1 (-33.7, -22.4) | -2.0 (-5.7, 1.7)   | -8.1 (-13.7, -2.4)   | -21.0 (-29.2, -12.8) |
| Yunnan           | Nujiang       | -3.3 (-7.6, 0.9)   | -12.0 (-17.1, -6.9)  | -29.1 (-34.3, -23.8) | -2.5 (-6.4, 1.4)   | -9.4 (-14.6, -4.3)   | -23.3 (-30.7, -16.0) |
| Yunnan           | Deqen         | 2.6 (-3.9, 9.1)    | -2.6 (-11.9, 6.7)    | -17.7 (-29.3, -6.1)  | 5.2 (-1.1, 11.4)   | 6.6 (-4.4, 17.5)     | 6.6 (-11.1, 24.3)    |
| <b>Qingzang</b>  |               |                    |                      |                      |                    |                      |                      |
| Tibet            | Lhasa         | -6.0 (-9.6, -2.3)  | -16.3 (-20.0, -12.5) | -33.7 (-36.9, -30.4) | -5.4 (-10.8, 0.0)  | -14.9 (-20.7, -9.2)  | -33.2 (-40.7, -25.7) |
| Tibet            | Rikaze        | -5.6 (-9.4, -1.8)  | -15.8 (-20.2, -11.4) | -33.1 (-37.2, -29.0) | -5.3 (-10.7, 0.1)  | -14.6 (-20.6, -8.5)  | -32.2 (-40.6, -23.8) |
| Tibet            | Qamdo         | -9.4 (-25.5, 6.7)  | -20.0 (-39.0, -1.1)  | -36.3 (-52.0, -20.6) | -9.0 (-24.6, 6.6)  | -22.3 (-37.0, -7.6)  | -36.7 (-55.3, -18.0) |
| Tibet            | Shannan       | -6.6 (-9.8, -3.3)  | -17.3 (-20.9, -13.6) | -34.8 (-37.9, -31.8) | -6.0 (-10.6, -1.4) | -16.8 (-21.8, -11.7) | -36.1 (-43.0, -29.2) |
| Tibet            | Nagari        | 0.0 (-8.8, 8.7)    | -6.4 (-15.3, 2.5)    | -23.3 (-32.3, -14.3) | 1.0 (-5.5, 7.4)    | -1.3 (-13.6, 10.9)   | -8.8 (-26.3, 8.8)    |
| Tibet            | Ngari         | -7.2 (-12.4, -1.9) | -17.3 (-22.3, -12.3) | -34.9 (-40.1, -29.8) | -6.5 (-12.2, -0.8) | -17.5 (-24.1, -10.8) | -34.7 (-40.4, -29.1) |
| Tibet            | Nyingchi      | -6.5 (-9.6, -3.5)  | -16.8 (-20.1, -13.6) | -34.5 (-37.4, -31.6) | -6.0 (-10.1, -1.9) | -16.2 (-20.5, -11.9) | -35.4 (-40.5, -30.4) |
| Qinghai          | Xining        | -4.9 (-9.2, -0.7)  | -14.2 (-18.3, -10.2) | -31.6 (-34.8, -28.5) | -4.0 (-8.7, 0.6)   | -12.3 (-17.5, -7.1)  | -28.5 (-34.1, -22.9) |
| Qinghai          | Haidong       | -4.9 (-9.2, -0.7)  | -14.2 (-18.3, -10.2) | -31.6 (-34.8, -28.5) | -4.0 (-8.7, 0.6)   | -12.3 (-17.5, -7.1)  | -28.5 (-34.1, -22.9) |
| Qinghai          | Haibei        | -1.3 (-6.0, 3.5)   | -9.0 (-15.2, -2.8)   | -25.9 (-32.1, -19.6) | 0.0 (-5.4, 5.5)    | -4.8 (-12.6, 3.0)    | -15.9 (-24.9, -7.0)  |
| Qinghai          | Huangnan      | -1.2 (-14.8, 12.4) | -9.6 (-23.0, 3.8)    | -27.8 (-37.7, -17.9) | 0.5 (-14.0, 15.0)  | -6.1 (-21.2, 8.9)    | -23.0 (-42.6, -3.4)  |
| Qinghai          | Hainan        | -3.7 (-8.3, 0.8)   | -12.9 (-17.3, -8.5)  | -30.4 (-34.1, -26.7) | -2.6 (-7.0, 1.9)   | -10.2 (-15.4, -4.9)  | -25.3 (-32.8, -17.8) |
| Qinghai          | Golog         | 3.0 (-7.6, 13.5)   | -3.1 (-13.9, 7.8)    | -19.4 (-30.2, -8.7)  | 4.5 (-5.3, 14.3)   | 3.9 (-9.1, 17.0)     | -0.4 (-17.7, 17.0)   |
| Qinghai          | Yushu         | -1.2 (-11.4, 9.0)  | -9.7 (-18.5, -0.9)   | -27.0 (-34.9, -19.2) | -0.7 (-9.7, 8.3)   | -6.3 (-15.3, 2.7)    | -19.6 (-28.2, -11.0) |
| Qinghai          | Haixi         | -3.1 (-8.4, 2.1)   | -11.9 (-16.8, -7.0)  | -29.3 (-33.9, -24.7) | -2.1 (-7.4, 3.1)   | -8.9 (-14.3, -3.5)   | -22.2 (-29.2, -15.2) |
| <b>Northwest</b> |               |                    |                      |                      |                    |                      |                      |
| Shaanxi          | Xi'an         | -6.5 (-8.9, -4.1)  | -16.5 (-18.7, -14.3) | -34.0 (-36.1, -32.0) | -6.1 (-8.7, -3.5)  | -16.2 (-18.9, -13.4) | -34.1 (-36.2, -31.9) |
| Shaanxi          | Tongchuan     | -6.5 (-8.9, -4.1)  | -16.5 (-18.7, -14.3) | -34.0 (-36.1, -32.0) | -6.1 (-8.7, -3.5)  | -16.2 (-18.9, -13.4) | -34.1 (-36.2, -31.9) |
| Shaanxi          | Baoji         | -6.5 (-8.9, -4.1)  | -16.5 (-18.7, -14.3) | -34.0 (-36.1, -32.0) | -6.1 (-8.7, -3.5)  | -16.2 (-18.9, -13.4) | -34.1 (-36.2, -31.9) |
| Shaanxi          | Xianyang      | -6.5 (-8.9, -4.1)  | -16.5 (-18.7, -14.3) | -34.0 (-36.1, -32.0) | -6.1 (-8.7, -3.5)  | -16.2 (-18.9, -13.4) | -34.1 (-36.2, -31.9) |
| Shaanxi          | Weinan        | -4.1 (-7.5, -0.7)  | -12.4 (-16.3, -8.5)  | -29.5 (-34.0, -25.0) | -2.7 (-6.6, 1.2)   | -9.2 (-14.6, -3.9)   | -23.1 (-29.2, -17.0) |
| Shaanxi          | Yan'an        | -5.9 (-8.3, -3.4)  | -15.4 (-17.5, -13.2) | -32.7 (-35.6, -29.9) | -5.0 (-7.9, -2.0)  | -14.0 (-17.3, -10.8) | -30.9 (-33.7, -28.1) |
| Shaanxi          | Hanzhong      | -6.5 (-8.8, -4.2)  | -16.6 (-18.9, -14.3) | -34.2 (-36.1, -32.3) | -6.2 (-8.6, -3.9)  | -16.4 (-19.3, -13.6) | -34.8 (-38.0, -31.7) |
| Shaanxi          | Yulin         | -5.7 (-8.7, -2.6)  | -14.7 (-17.6, -11.9) | -32.0 (-35.5, -28.6) | -4.6 (-8.3, -1.0)  | -12.9 (-16.4, -9.5)  | -28.7 (-32.6, -24.9) |
| Shaanxi          | Ankang        | -7.1 (-9.3, -4.8)  | -17.6 (-19.7, -15.6) | -35.4 (-37.8, -33.0) | -7.1 (-9.3, -5.0)  | -18.0 (-20.4, -15.7) | -37.3 (-40.2, -34.5) |
| Shaanxi          | Shangluo      | -6.4 (-8.2, -4.6)  | -16.3 (-18.1, -14.6) | -33.7 (-35.6, -31.9) | -6.0 (-8.3, -3.7)  | -16.0 (-18.3, -13.7) | -33.8 (-36.2, -31.3) |
| Shaanxi          | Xixian        | -6.5 (-8.9, -4.1)  | -16.5 (-18.7, -14.3) | -34.0 (-36.1, -32.0) | -6.1 (-8.7, -3.5)  | -16.2 (-18.9, -13.4) | -34.1 (-36.2, -31.9) |
| Gansu            | Lanzhou       | -3.6 (-6.7, -0.4)  | -12.0 (-15.7, -8.2)  | -29.2 (-32.6, -25.7) | -2.6 (-6.5, 1.4)   | -9.3 (-14.1, -4.5)   | -21.9 (-27.7, -16.1) |
| Gansu            | Jiayuguan     | -3.8 (-6.6, -1.0)  | -12.4 (-15.8, -9.1)  | -29.3 (-33.2, -25.4) | -2.9 (-5.8, -0.1)  | -9.7 (-14.9, -4.5)   | -22.0 (-29.0, -15.1) |
| Gansu            | Jinchang      | -2.8 (-7.0, 1.3)   | -10.8 (-15.8, -5.8)  | -27.8 (-33.1, -22.5) | -1.6 (-5.5, 2.2)   | -7.4 (-13.8, -0.9)   | -18.4 (-27.1, -9.8)  |
| Gansu            | Baiyin        | -4.6 (-7.9, -1.2)  | -13.7 (-17.5, -9.9)  | -30.9 (-34.3, -27.5) | -3.9 (-6.5, -1.3)  | -11.8 (-16.1, -7.6)  | -26.3 (-31.6, -21.1) |
| Gansu            | Tianshui      | -1.5 (-6.2, 3.2)   | -8.5 (-14.6, -2.4)   | -25.5 (-31.6, -19.5) | 0.1 (-5.2, 5.4)    | -3.9 (-11.5, 3.7)    | -12.7 (-22.3, -3.1)  |
| Gansu            | Wuwei         | -4.0 (-8.4, 0.4)   | -12.8 (-17.4, -8.1)  | -29.9 (-34.2, -25.6) | -3.0 (-6.2, 0.1)   | -10.1 (-15.8, -4.5)  | -23.3 (-30.6, -16.1) |
| Gansu            | Zhangye       | -3.9 (-7.1, -0.7)  | -12.5 (-16.3, -8.8)  | -29.7 (-33.7, -25.7) | -2.9 (-5.8, -0.1)  | -9.9 (-14.8, -5.0)   | -22.9 (-29.6, -16.2) |
| Gansu            | Pingliang     | -4.2 (-6.9, -1.6)  | -12.8 (-15.9, -9.8)  | -30.2 (-33.6, -26.8) | -3.3 (-6.6, 0.1)   | -10.8 (-15.2, -6.4)  | -24.7 (-30.0, -19.4) |
| Gansu            | Jiuquan       | -3.8 (-6.6, -1.0)  | -12.4 (-15.8, -9.1)  | -29.3 (-33.2, -25.4) | -2.9 (-5.8, -0.1)  | -9.7 (-14.9, -4.5)   | -22.0 (-29.0, -15.1) |
| Gansu            | Qingyang      | -4.2 (-7.3, -1.1)  | -12.6 (-16.3, -8.9)  | -30.0 (-34.0, -26.0) | -3.0 (-6.7, 0.6)   | -10.4 (-15.1, -5.6)  | -23.8 (-29.7, -17.9) |
| Gansu            | Dingxi        | -1.5 (-6.2, 3.2)   | -8.5 (-14.6, -2.4)   | -25.5 (-31.6, -19.5) | 0.1 (-5.2, 5.4)    | -3.9 (-11.5, 3.7)    | -12.7 (-22.3, -3.1)  |
| Gansu            | Longnan       | -5.6 (-8.0, -3.3)  | -15.1 (-17.5, -12.6) | -32.7 (-34.9, -30.4) | -4.9 (-7.0, -2.9)  | -14.0 (-16.5, -11.4) | -30.2 (-32.8, -27.6) |
| Gansu            | Linxia        | -3.4 (-6.4, -0.4)  | -11.9 (-15.7, -8.1)  | -29.0 (-32.6, -25.5) | -2.4 (-6.5, 1.7)   | -9.1 (-14.2, -4.0)   | -22.0 (-28.0, -15.9) |
| Gansu            | Gannan        | -0.4 (-5.1, 4.2)   | -7.4 (-14.0, -0.9)   | -24.3 (-30.7, -17.9) | 0.9 (-6.0, 7.9)    | -2.4 (-10.7, 6.0)    | -10.5 (-21.7, 0.7)   |
| Ningxia          | Yinchuan      | -3.6 (-6.9, -0.3)  | -11.9 (-15.4, -8.4)  | -28.9 (-33.2, -24.6) | -2.7 (-5.5, 0.1)   | -8.9 (-14.3, -3.6)   | -20.7 (-27.8, -13.5) |
| Ningxia          | Shizuishan    | -3.2 (-6.6, 0.2)   | -11.4 (-15.3, -7.4)  | -28.4 (-33.2, -23.6) | -2.4 (-5.6, 0.7)   | -8.3 (-14.2, -2.4)   | -19.6 (-27.6, -11.7) |
| Ningxia          | Wuzhong       | -3.6 (-6.9, -0.3)  | -11.9 (-15.4, -8.4)  | -28.9 (-33.2, -24.6) | -2.7 (-5.5, 0.1)   | -8.9 (-14.3, -3.6)   | -20.7 (-27.8, -13.5) |
| Ningxia          | Guyuan        | -2.5 (-6.5, 1.5)   | -10.0 (-15.0, -5.0)  | -27.1 (-32.7, -21.6) | -1.0 (-5.6, 3.5)   | -6.3 (-13.4, 0.8)    | -16.7 (-26.1, -7.3)  |
| Ningxia          | Zhongwei      | -3.8 (-6.9, -0.8)  | -12.2 (-15.7, -8.7)  | -29.2 (-33.5, -25.0) | -2.9 (-5.4, -0.4)  | -9.4 (-14.5, -4.3)   | -21.6 (-28.4, -14.8) |
| Xinjiang         | Urumqi        | -6.2 (-12.1, -0.2) | -15.1 (-19.7, -10.4) | -33.0 (-37.2, -28.8) | -5.1 (-11.2, 1.0)  | -14.8 (-23.4, -6.1)  | -33.1 (-41.2, -25.1) |
| Xinjiang         | Karamay       | -6.3 (-14.3, 1.6)  | -14.8 (-21.6, -7.9)  | -32.7 (-39.4, -25.9) | -4.7 (-11.4, 2.0)  | -13.9 (-21.2, -6.6)  | -30.9 (-37.5, -24.4) |
| Xinjiang         | Turpan        | -6.9 (-13.5, -0.4) | -16.6 (-21.9, -11.4) | -34.4 (-38.7, -30.2) | -6.2 (-10.5, -1.9) | -16.4 (-22.1, -10.7) | -34.8 (-40.1, -29.6) |

|          |          |                    |                      |                      |                    |                      |                      |
|----------|----------|--------------------|----------------------|----------------------|--------------------|----------------------|----------------------|
| Xinjiang | Hami     | -6.0 (-10.6, -1.5) | -15.3 (-18.8, -11.8) | -33.1 (-36.3, -29.9) | -5.3 (-8.8, -1.8)  | -14.7 (-19.9, -9.5)  | -32.1 (-36.7, -27.5) |
| Xinjiang | Changji  | -4.8 (-11.5, 1.9)  | -12.7 (-18.8, -6.6)  | -31.1 (-36.3, -25.8) | -3.3 (-9.1, 2.4)   | -11.6 (-18.8, -4.4)  | -27.7 (-34.9, -20.6) |
| Xinjiang | Bortala  | -6.9 (-12.8, -0.9) | -15.8 (-22.9, -8.8)  | -33.5 (-40.7, -26.3) | -5.4 (-11.7, 1.0)  | -15.0 (-20.9, -9.1)  | -31.2 (-37.2, -25.1) |
| Xinjiang | Bayingol | -6.6 (-10.5, -2.8) | -16.4 (-20.3, -12.4) | -34.0 (-37.0, -31.0) | -5.8 (-8.6, -3.0)  | -16.0 (-19.8, -12.3) | -34.3 (-38.1, -30.5) |
| Xinjiang | Aksu     | -6.1 (-9.4, -2.8)  | -15.4 (-18.4, -12.4) | -33.0 (-35.5, -30.6) | -5.2 (-7.8, -2.5)  | -14.7 (-18.0, -11.3) | -31.5 (-34.6, -28.4) |
| Xinjiang | Kizilsu  | -4.3 (-20.7, 12.2) | -10.5 (-29.1, 8.1)   | -28.6 (-43.6, -13.6) | -1.3 (-15.8, 13.3) | -7.0 (-23.5, 9.6)    | -23.6 (-42.4, -4.9)  |
| Xinjiang | Kashgar  | -6.3 (-9.9, -2.7)  | -15.7 (-19.8, -11.7) | -33.4 (-36.7, -30.0) | -5.6 (-9.0, -2.1)  | -14.9 (-18.7, -11.1) | -32.2 (-36.6, -27.8) |
| Xinjiang | Hotan    | -6.4 (-10.9, -1.8) | -16.3 (-20.9, -11.6) | -33.8 (-37.6, -30.0) | -5.8 (-9.9, -1.7)  | -15.9 (-20.8, -10.9) | -33.4 (-38.1, -28.8) |
| Xinjiang | Ili      | -5.4 (-10.3, -0.6) | -13.6 (-17.6, -9.7)  | -31.3 (-35.3, -27.3) | -3.1 (-7.7, 1.6)   | -11.5 (-16.6, -6.5)  | -26.7 (-31.4, -22.0) |
| Xinjiang | Qoqek    | -4.3 (-12.2, 3.6)  | -12.1 (-18.9, -5.4)  | -30.1 (-36.8, -23.5) | -2.8 (-8.3, 2.7)   | -10.7 (-16.1, -5.3)  | -25.1 (-31.1, -19.2) |
| Xinjiang | Altay    | -3.3 (-11.6, 5.0)  | -11.4 (-19.3, -3.4)  | -28.8 (-35.8, -21.7) | -1.5 (-7.9, 5.0)   | -8.3 (-15.3, -1.4)   | -21.2 (-27.8, -14.7) |
| Xinjiang | Shihezi  | -6.4 (-12.7, -0.1) | -14.8 (-20.6, -9.0)  | -32.5 (-37.8, -27.3) | -4.0 (-9.6, 1.5)   | -13.7 (-20.1, -7.2)  | -30.4 (-37.2, -23.7) |
| Xinjiang | Aral     | -6.5 (-10.1, -3.0) | -16.0 (-19.3, -12.7) | -33.7 (-36.4, -30.9) | -5.6 (-8.3, -2.9)  | -15.5 (-18.7, -12.3) | -33.0 (-36.6, -29.4) |
| Xinjiang | Tumxuk   | -6.8 (-10.5, -3.2) | -16.7 (-20.0, -13.4) | -34.3 (-36.8, -31.8) | -6.5 (-9.9, -3.2)  | -16.7 (-20.0, -13.4) | -34.6 (-37.3, -31.9) |
| Xinjiang | Wujiaqu  | -4.8 (-11.5, 1.9)  | -12.7 (-18.8, -6.6)  | -31.1 (-36.3, -25.8) | -3.3 (-9.1, 2.4)   | -11.6 (-18.8, -4.4)  | -27.7 (-34.9, -20.6) |

Note: eCI, empirical confidence interval; HFMD, hand, foot, and mouth disease; RCP, Representative Concentration Pathway; CJP, county under the jurisdiction of province. Pooled province level temperature-HFMD associations were used for projecting, with controlling for long-term trend and seasonality, relative humidity, day of the week, holidays (public holidays, and summer and winter school holidays), and autocorrelations in the residuals.

Data on population projections aged 0–14 years by 2100 were downloaded from the Population Division, United Nations

(<https://esa.un.org/unpd/wpp/Download/Probabilistic/Population/>).

**Table S7.** Projected percentage change (and 95% eCIs) in HFMD incidence (national level) among children aged 0–14 years due to climate change (RCP 4.5 and 8.5 scenarios), relative to baseline estimates for 2009–2014, estimated using models including natural cubic splines (seven to nine degrees of freedom per year) to control for seasonality and long-term trend.

| No. of dfs | RCP 4.5 (percentage change and 95% eCI) |                   |                   | RCP 8.5 (percentage change and 95% eCI) |                   |                   |
|------------|-----------------------------------------|-------------------|-------------------|-----------------------------------------|-------------------|-------------------|
|            | 2030s                                   | 2050s             | 2090s             | 2030s                                   | 2050s             | 2090s             |
| 7          | 1.8 (-6.2, 9.8)                         | 3.0 (-11.2, 17.2) | 4.0 (-15.9, 23.8) | 2.2 (-7.7, 12.0)                        | 4.5 (-17.5, 26.5) | 8.2 (-42.9, 59.3) |
| 8          | 1.7 (-9.4, 12.8)                        | 2.9 (-16.8, 22.5) | 3.7 (-23.8, 31.3) | 2.0 (-10.5, 14.5)                       | 4.2 (-23.6, 32.0) | 7.0 (-61.4, 75.4) |
| 9          | 1.4 (-7.1, 9.9)                         | 2.3 (-12.9, 17.6) | 3.0 (-18.2, 24.2) | 1.7 (-8.4, 11.8)                        | 3.5 (-19.4, 26.3) | 5.7 (-46.5, 57.9) |

Note: eCI, empirical confidence interval; HFMD, hand, foot, and mouth disease; RCP, Representative Concentration Pathway; dfs, degrees of freedom. Pooled province level temperature-HFMD associations were used for projecting, with controlling for long-term trend and seasonality, relative humidity, day of the week, holidays (public holidays, and summer and winter school holidays), and autocorrelations in the residuals. Projections were performed holding population sizes and temperature-HFMD associations constant over time.

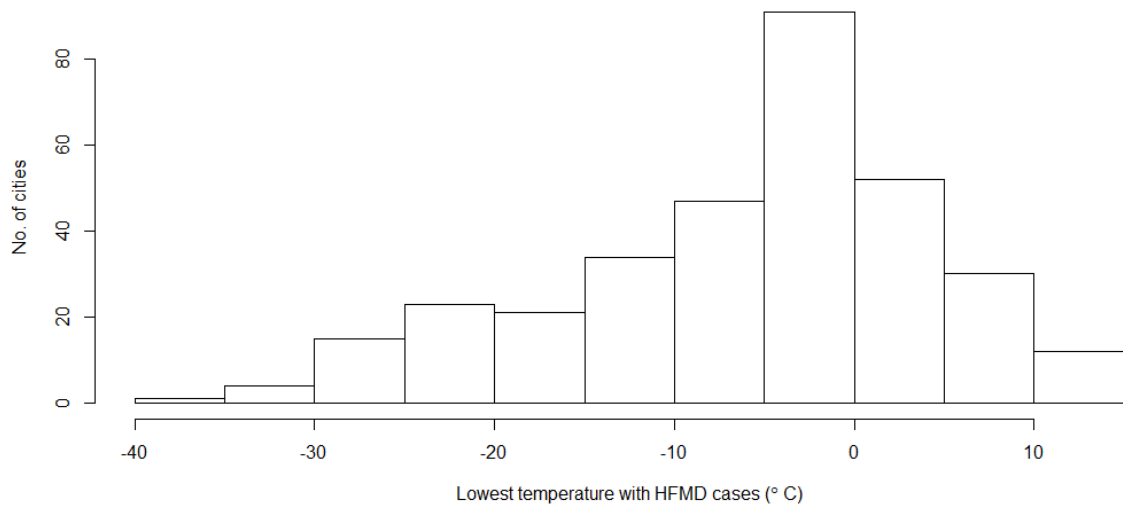

**Figure S1.** Distribution of the lowest daily mean temperature at which HFMD cases were diagnosed across 362 sites in China during 2009–2014. Abbreviation: HFMD, hand, foot, and mouth disease.

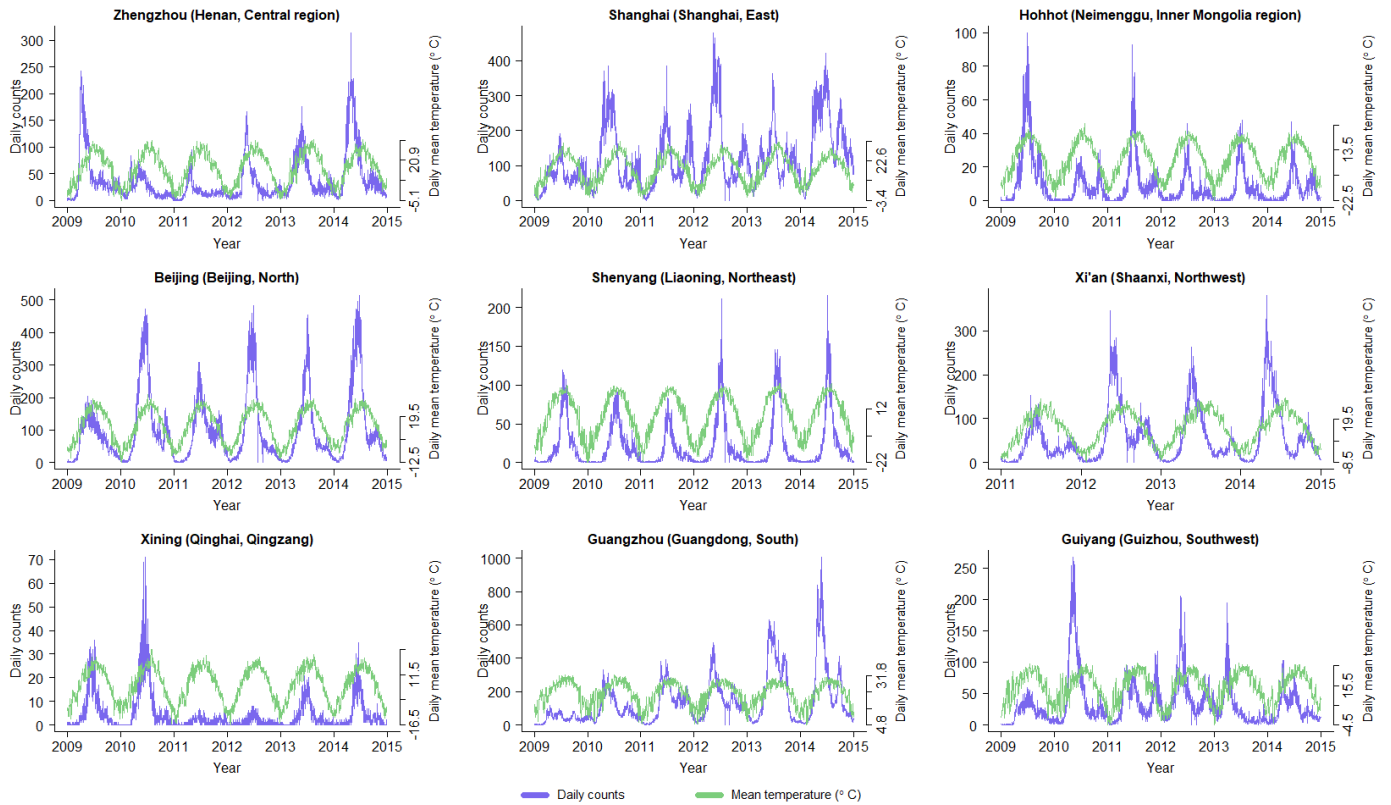

**Figure S2.** Daily HFMD counts and mean temperature in representative cities in nine Chinese regions during 2009–2014. Data on daily HFMD and weather for each city were extracted from the China Information System for Disease Control and Prevention (<http://www.cdpc.chinacdc.cn>) and China Meteorological Data Sharing Service System (<http://data.cma.gov.cn>), respectively. Abbreviation: HFMD, hand, foot, and mouth disease.



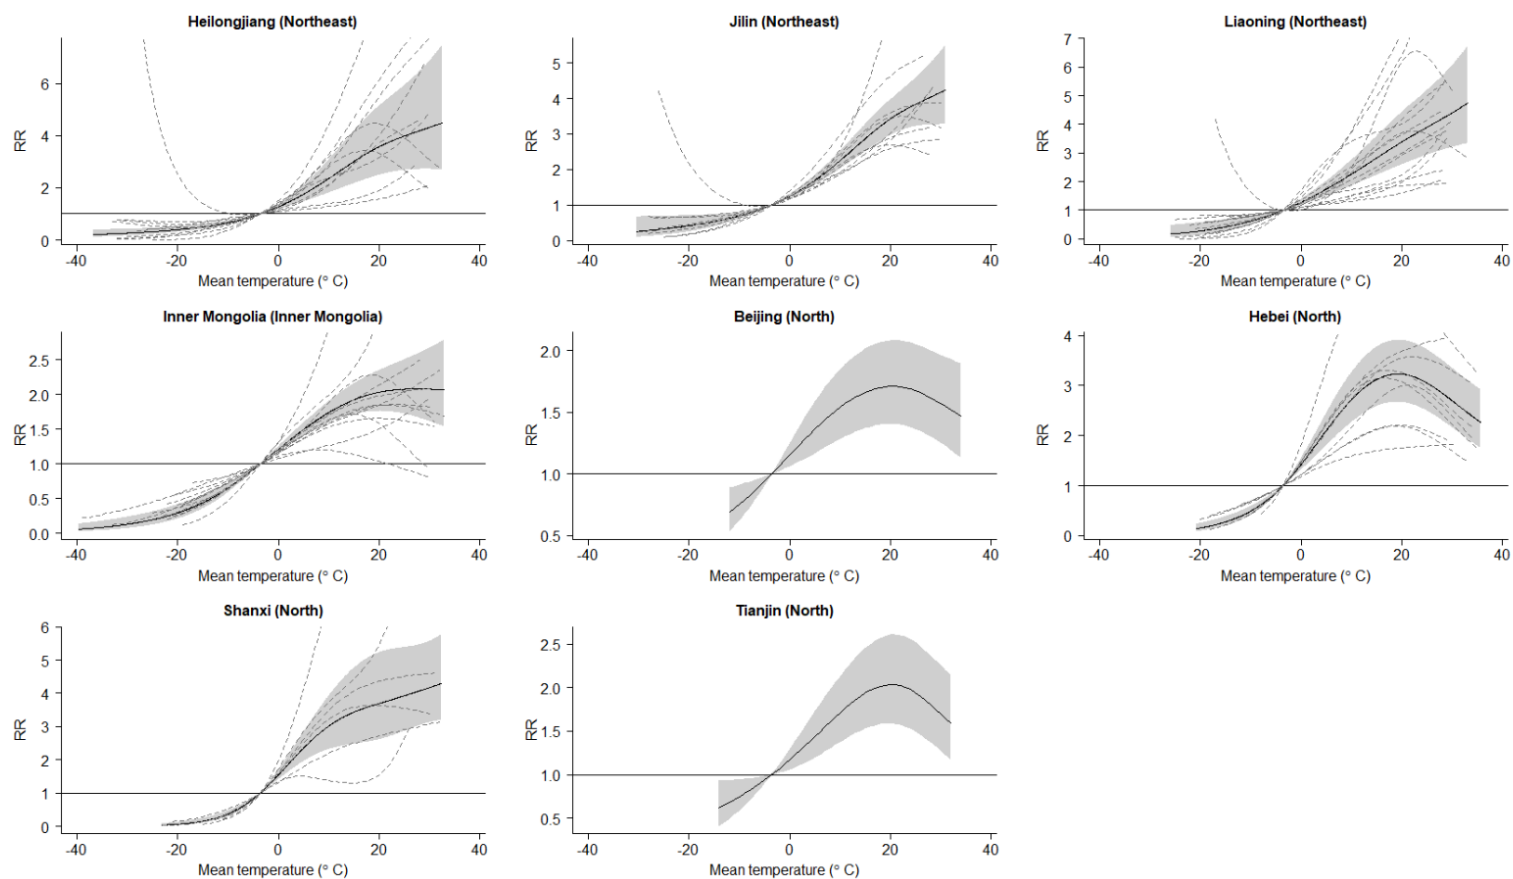

**Figure S3.** Pooled associations between daily mean temperature and HFMD in each province or municipality in the Northeast, Inner Mongolia, and North over a 0–14 day cumulative lag during 2009–2014. Solid lines represent province- or municipality-specific associations; shaded areas indicate 95% confidence interval bands. Grey-dashed lines indicate associations estimated for individual prefectures or CJPs. Natural cubic splines (with three degrees of freedom) were used to model temperature and lag days, respectively.  $I^2$  statistics for each pooled estimate are provided in Table S3. Patterns of associations are irregular for some prefecture- or CJP-specific associations because of small numbers of HFMD cases. Abbreviations: HFMD, hand, foot, and mouth disease; CJP, county under the jurisdiction of province; RR, relative risk.

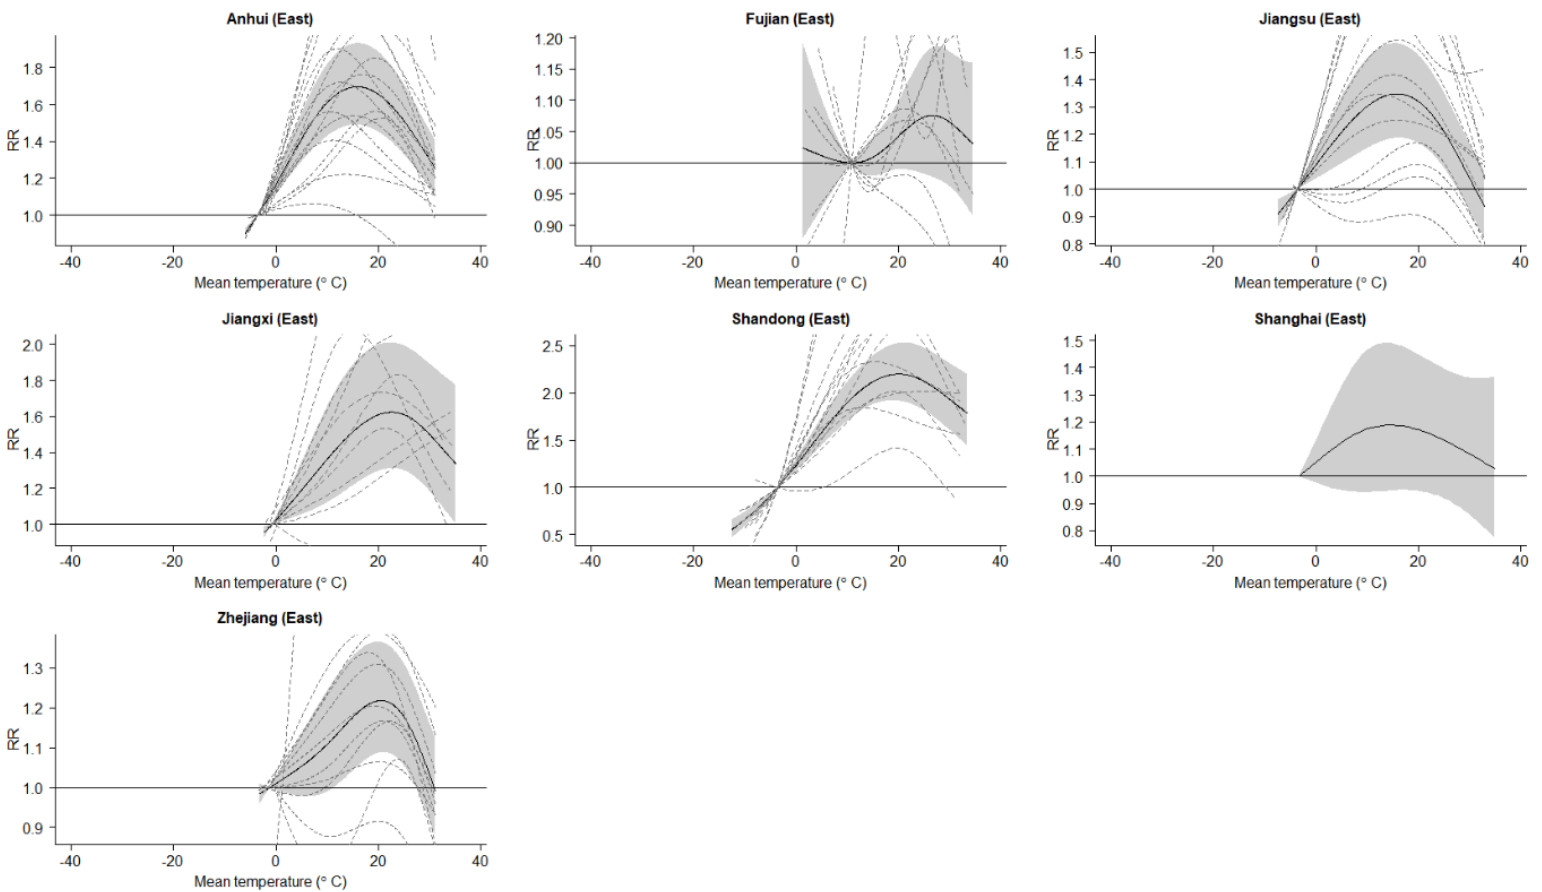

**Figure S4.** Pooled associations between daily mean temperature and HFMD in each province or municipality in the East over a 0–14 day cumulative lag during 2009–2014. Solid lines represent province- or municipality-specific associations; shaded areas indicate 95% confidence interval bands. Grey-dashed lines indicate associations estimated for individual prefectures or CJPs. Natural cubic splines (with three degrees of freedom) were used to model temperature and lag days, respectively.  $I^2$  statistics for each pooled estimate are provided in Table S3. Patterns of associations are irregular for some prefecture- or CJP-specific associations because of small numbers of HFMD cases. Abbreviations: HFMD, hand, foot, and mouth disease; CJP, county under the jurisdiction of province; RR, relative risk.

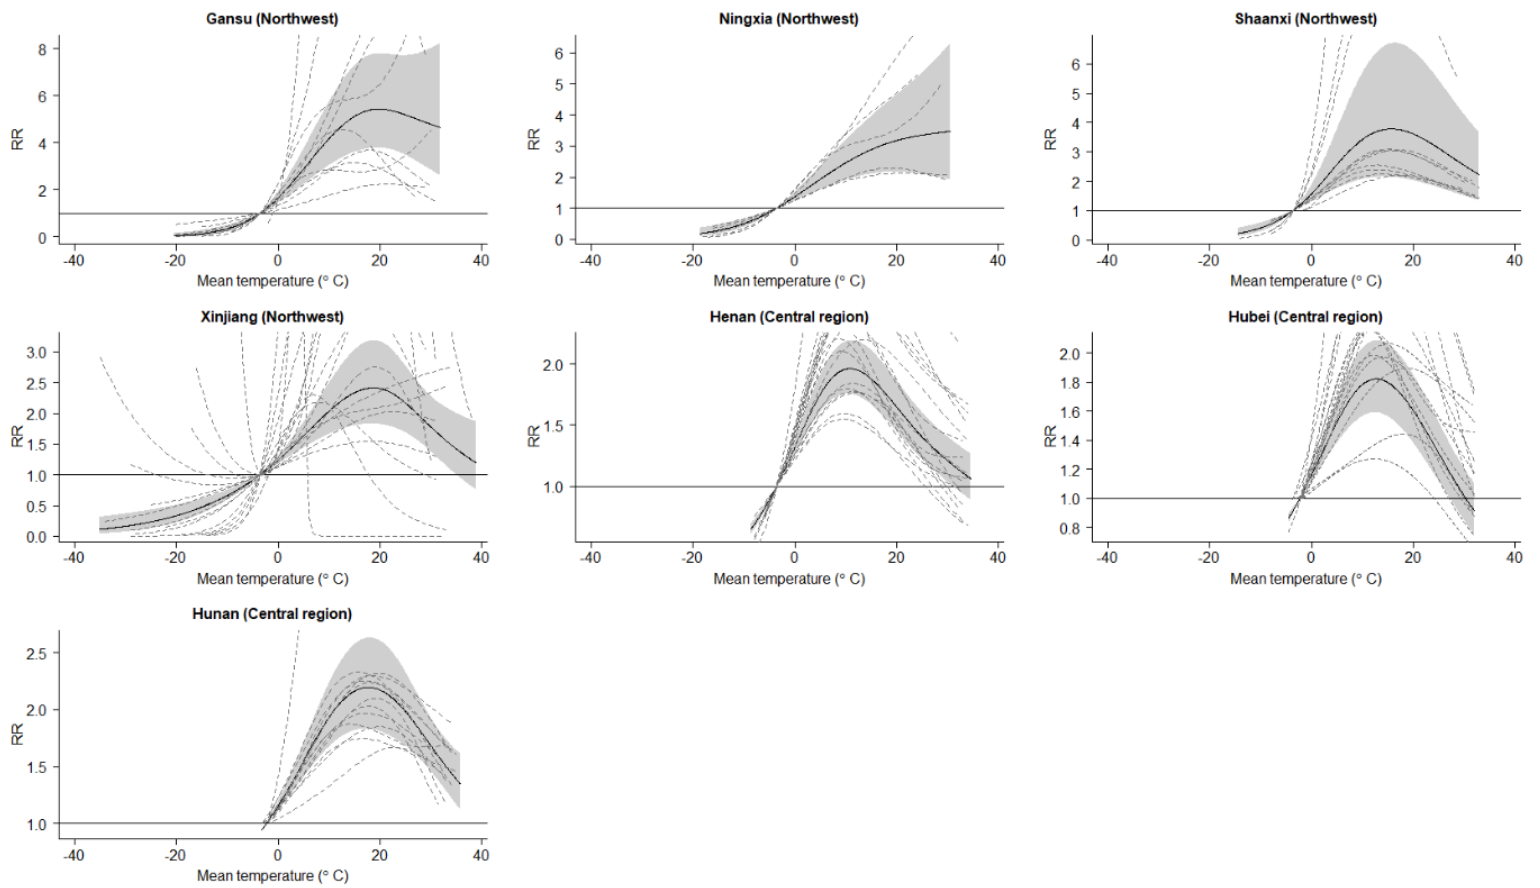

**Figure S5.** Pooled associations between daily mean temperature and HFMD in each province or municipality in the Northwest and Central regions over a 0–14 day cumulative lag during 2009–2014. Solid lines represent province- or municipality-specific associations; shaded areas indicate 95% confidence interval bands. Grey-dashed lines indicate associations estimated for individual prefectures or CJPs. Natural cubic splines (with three degrees of freedom) were used to model temperature and lag days, respectively.  $I^2$  statistics for each pooled estimate are provided in Table S3. Patterns of associations are irregular for some prefecture- or CJP-specific associations because of small numbers of HFMD cases. Abbreviations: HFMD, hand, foot, and mouth disease; CJP, county under the jurisdiction of province; RR, relative risk.

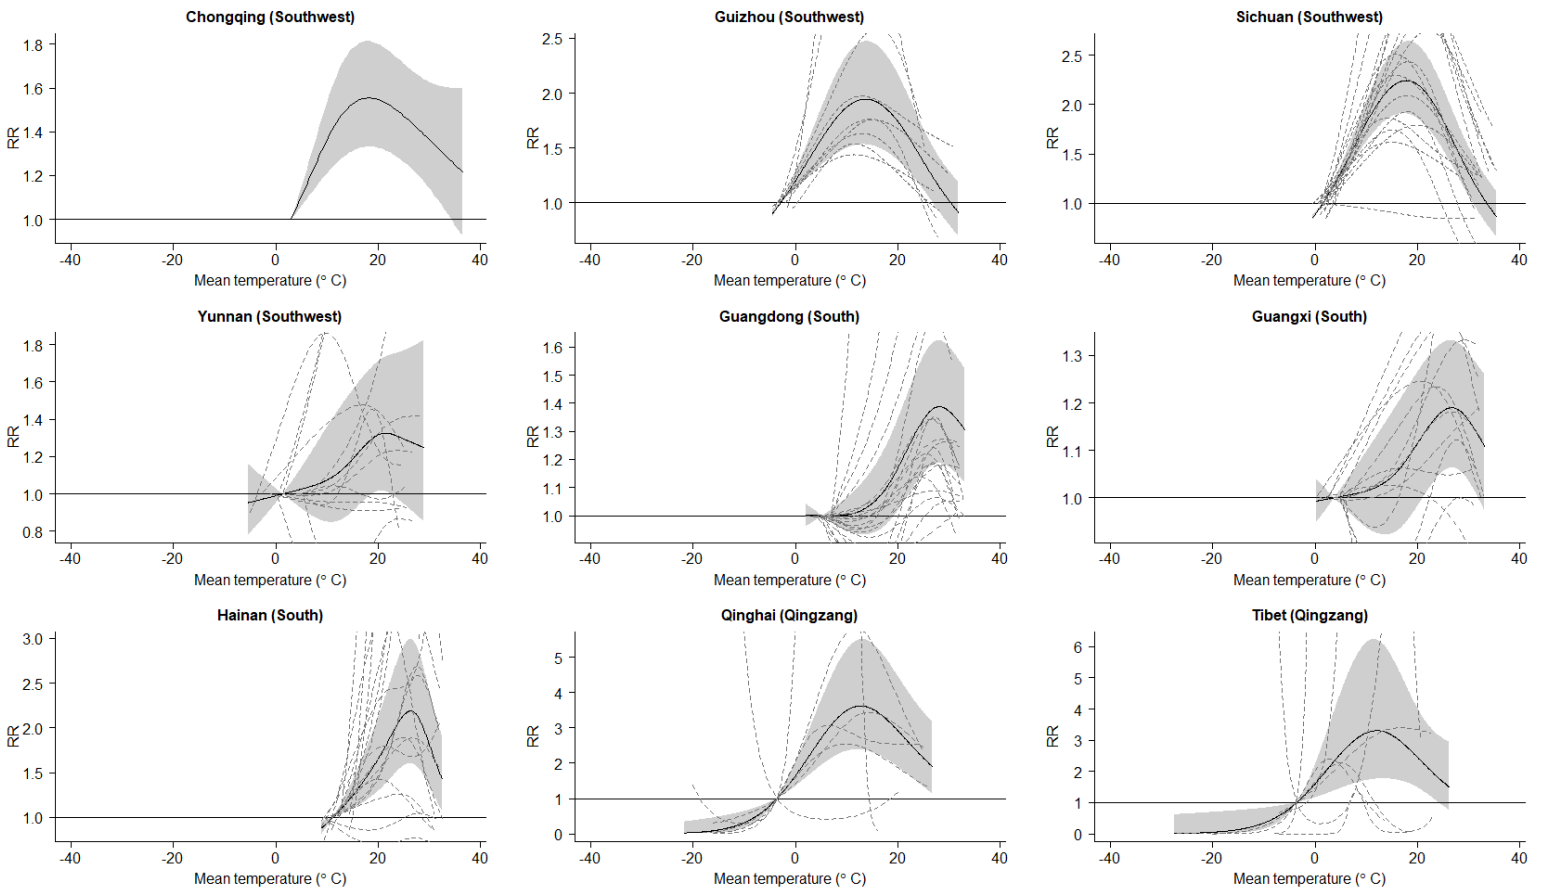

**Figure S6.** Pooled associations between daily mean temperature and HFMD in each province or municipality in the Southwest, South and Qingzang regions over a 0–14 day cumulative lag during 2009–2014. Solid lines represent province- or municipality-specific associations; shaded areas indicate 95% confidence interval bands. Grey-dashed lines indicate associations estimated for individual prefectures or CJPs. Natural cubic splines (with three degrees of freedom) were used to model temperature and lag days, respectively.  $I^2$  statistics for each pooled estimate are provided in Table S3. Patterns of associations are irregular for some prefecture- or CJP-specific associations because of small numbers of HFMD cases. Abbreviations: HFMD, hand, foot, and mouth disease; CJP, county under the jurisdiction of province; RR, relative risk.

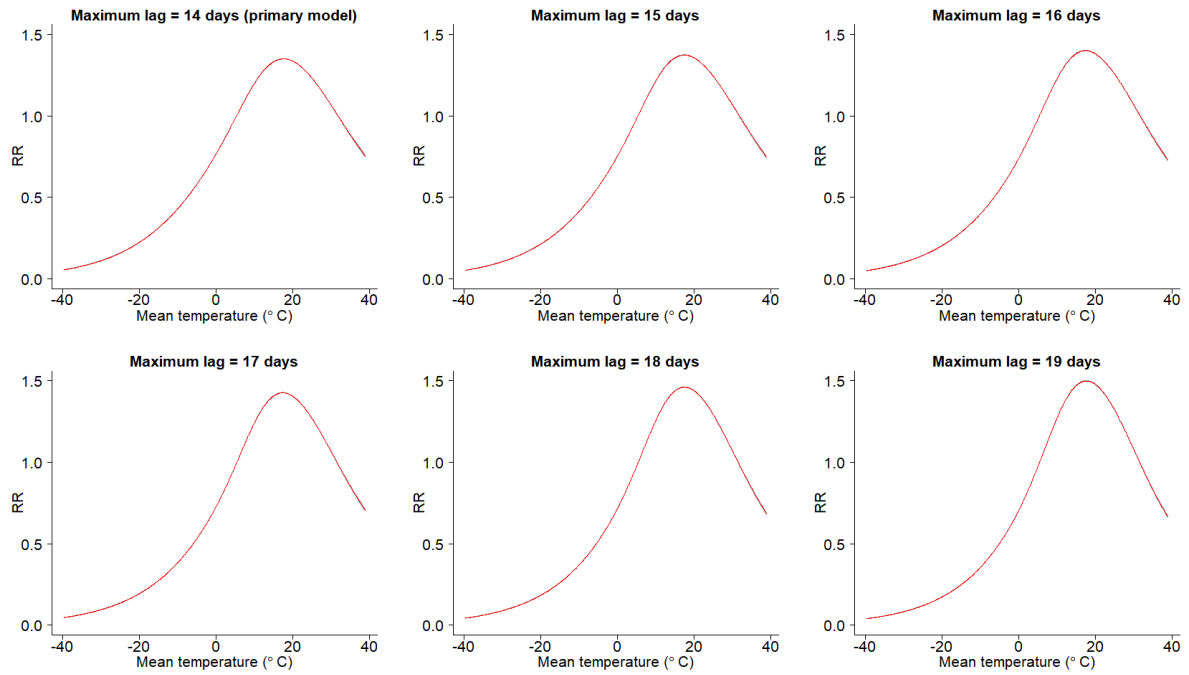

**Figure S7.** Pooled associations between daily mean temperature and HFMD for all locations (national level) during 2009–2014 for models with the maximum lag set at 14 days (the primary model) and 15–19 days. The grey-shaded areas indicate the 95% confidence interval bands, which are negligible due to the narrow values. Natural cubic splines (with three degrees of freedom) were used to model temperature and lag days, respectively. Abbreviations: HFMD, hand, foot, and mouth disease; RR, relative risk.

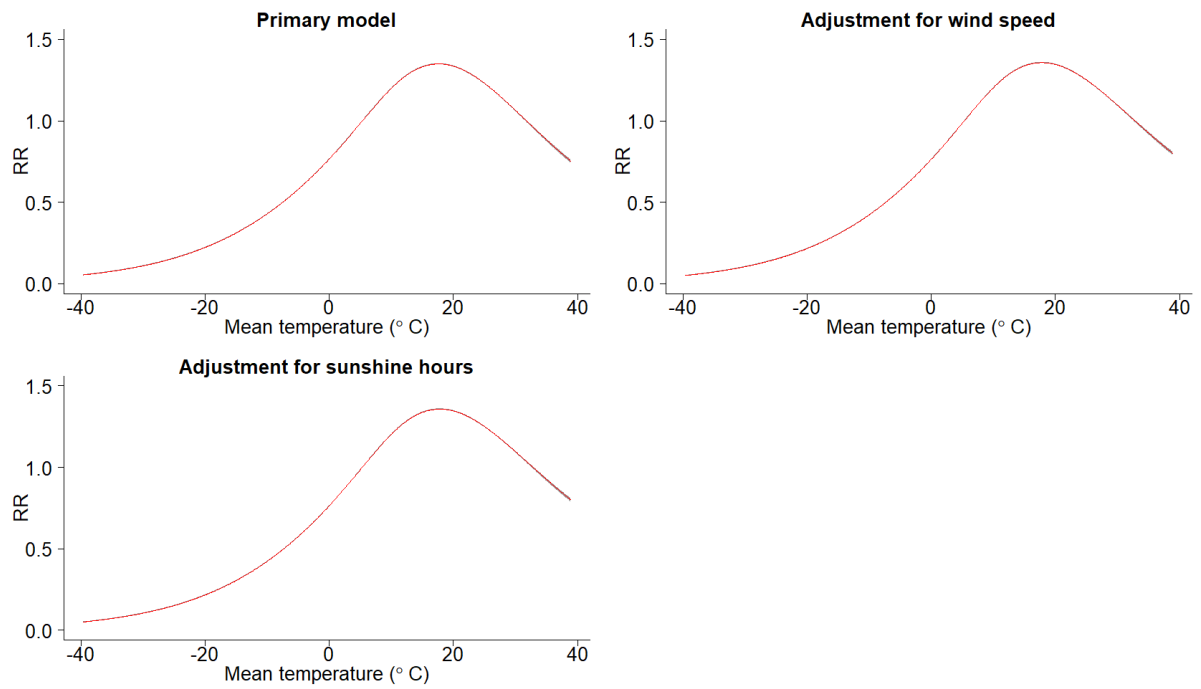

**Figure S8.** Pooled associations between daily mean temperature and HFMD for all locations (national level) during 2009–2014 based on the primary model, and with additional adjustment for daily wind velocity and daily sunshine hours, respectively. The grey-shaded areas indicate the 95% confidence interval bands, which are negligible due to the narrow values. Natural cubic splines (with three degrees of freedom) were used to model temperature and lag days, respectively. Abbreviations: HFMD, hand, foot, and mouth disease; RR, relative risk.

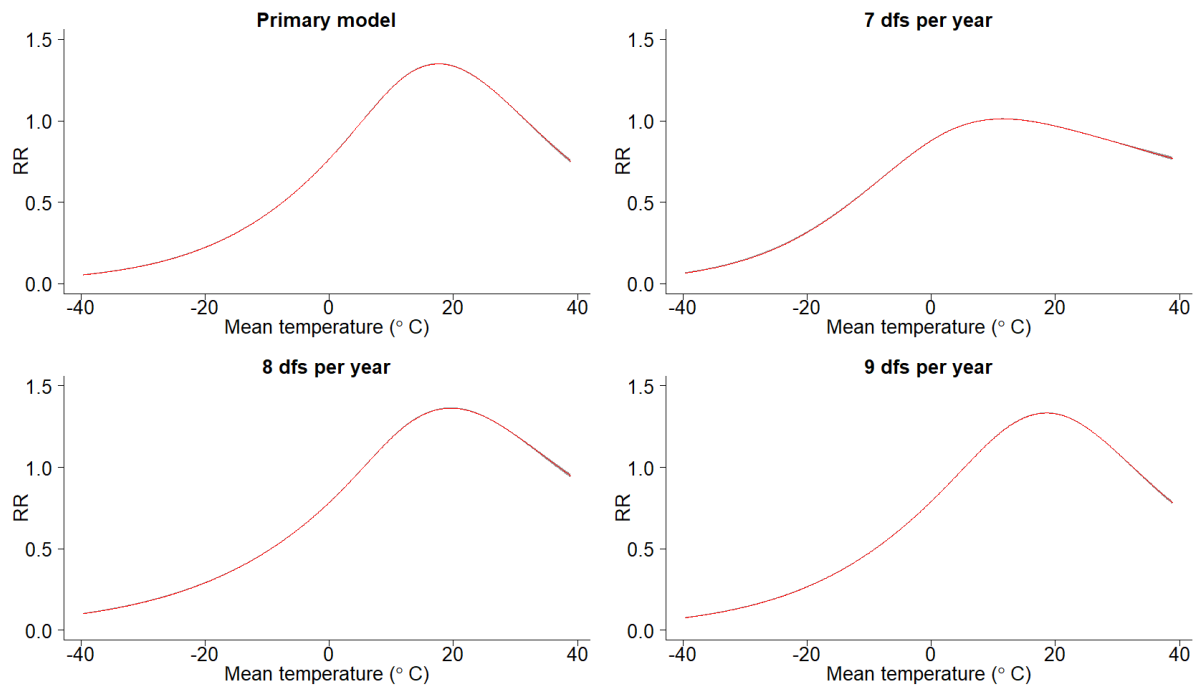

**Figure S9.** Pooled associations between daily mean temperature and HFMD for all locations (national level) during 2009–2014 based on the primary model (with indicator terms for year and month) and alternative models using natural cubic splines (with seven to nine degrees of freedom per year) to control for seasonality and long-term trend. The grey-shaded areas indicate the 95% confidence interval bands, which are negligible due to the narrow values. Natural cubic splines (with three degrees of freedom) were used to model temperature and lag days, respectively. Abbreviations: HFMD, hand, foot, and mouth disease; RR, relative risk.
